# Supplementary material for: Light-induced dissolution and concomitant crystallization of a Keggin-type polyoxometalate mimicking a naturally occurring phenomenon
Source: Royal Society of Chemistry journal article supplement (doi:10.1039/d2cc03273b), 2023-01-01
Supplement: d2cc03273b1.pdf [file d2cc03273b1.pdf]

## ESI

**Light induced dissolution and concomitant crystallization of a Keggin-type polyoxometalate mimicking a Naturally occurring phenomenon**

## S1 Fourier Transform Infrared (FTIR) Spectroscopic Analysis

The infrared spectra for the polycrystalline parent compound is shown in **Figure S2**.

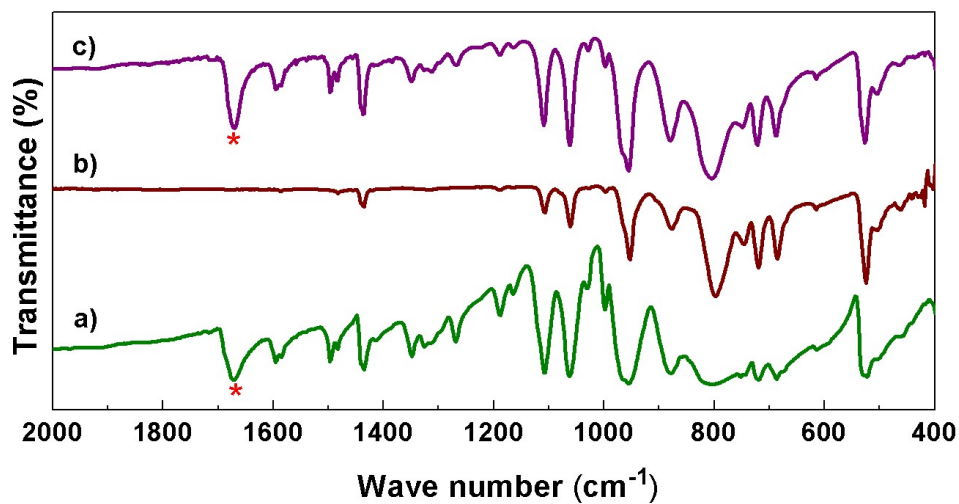

**Fig. S1.** Comparative IR spectra for a) Compound 1; b) Compound 2; c) Compound 3. The marked peaks represent the carbonyl stretching of the NMF solvent.

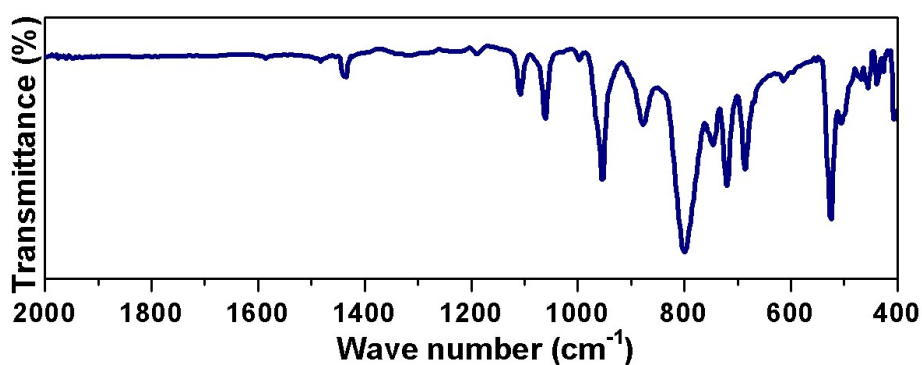

**Fig. S2.** Infrared spectra for compound polycrystalline parent

IR bands for Compound polycrystalline parent compound:  $\bar{\nu} = 1435$  (s,  $\nu(\text{C}=\text{C})$ ), 1104 (s,  $\nu_s(\text{P}-\text{C})$ ), 1060 (m,  $\nu_{as}(\text{PO}_4)$ ), 952 (m,  $\nu(\text{Mo}=\text{O}_t)$ ), 879 (s), 794 (s), 714 (m), 680 (s,  $\nu(\text{C}-\text{H})$ ), 522 (s), 408 (s)  $\text{cm}^{-1}$ .

## S2 Powder X-Ray Diffraction (PXRD) Analysis

The powder XRD pattern for the polycrystalline parent compound is shown in **Figure S3**

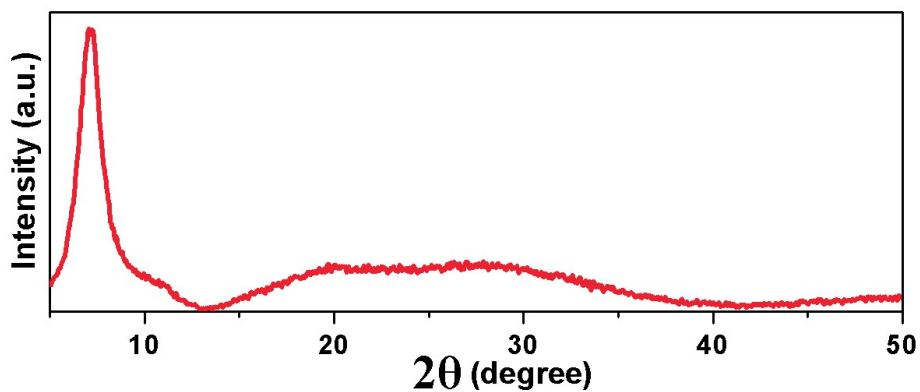

**Fig. S3.** Powder X-ray pattern for parent compound

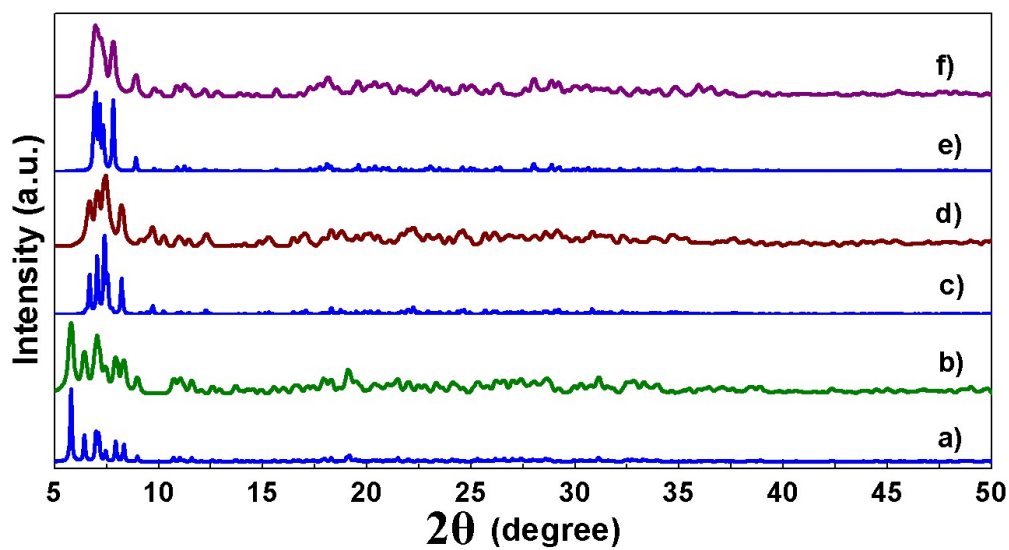

**Fig. S4.** a) Simulated powder XRD pattern for compound 1; b) Powder XRD pattern for as synthesized compound 1; c) Simulated powder XRD pattern for compound 2; d) Powder XRD pattern for as synthesized 2; e) Simulated powder pattern for compound 3; f) Powder XRD pattern for as synthesized compound 3.

# compound1

## $R_1=6.80\%$

### Crystal Data and Experimental

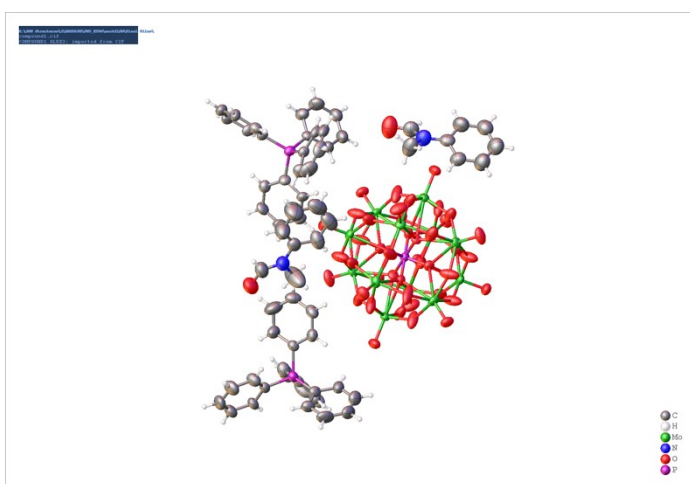

**Experimental.** Single clear dark green block-shaped crystals of **compound1** recrystallised from N-Methyl Formanilide by slow evaporation. A suitable crystal with dimensions  $0.22 \times 0.20 \times 0.19 \text{ mm}^3$  was selected and mounted on a Bruker APEX-II CCD diffractometer. The crystal was kept at a steady  $T = 292(2) \text{ K}$  during data collection. The structure was solved with the ShelXT 2018/2 (Sheldrick, 2018) solution program using iterative methods and by using Olex2 1.5-alpha (Dolomanov et al., 2009) as the graphical interface. The model was refined with ShelXL 2018/3 (Sheldrick, 2015) using full matrix least squares minimisation on  $F^2$ .

**Crystal Data.**  $\text{C}_{120}\text{H}_{107}\text{Mo}_{12}\text{N}_3\text{O}_{43}\text{P}_5$ ,  $M_r = 3585.21$ , triclinic,  $P-1$  (No. 2),  $a = 14.9244(8) \text{ \AA}$ ,  $b = 14.9531(9) \text{ \AA}$ ,  $c = 16.6482(9) \text{ \AA}$ ,  $\alpha = 84.920(3)^\circ$ ,  $\beta = 66.901(2)^\circ$ ,  $\gamma = 67.164(2)^\circ$ ,  $V = 3140.7(3) \text{ \AA}^3$ ,  $T = 292(2) \text{ K}$ ,  $Z = 1$ ,  $Z' = 0.5$ ,  $\mu(\text{MoK}\alpha) = 1.304$ , 90355 reflections measured, 10960 unique ( $R_{\text{int}} = 0.0363$ ) which were used in all calculations. The final  $wR_2$  was 0.1442 (all data) and  $R_1$  was 0.0680 ( $I \geq 2 \sigma(I)$ ).

| Compound                              | compound1                                                                     |
|---------------------------------------|-------------------------------------------------------------------------------|
| Formula                               | $\text{C}_{120}\text{H}_{107}\text{Mo}_{12}\text{N}_3\text{O}_{43}\text{P}_5$ |
| $D_{\text{calc.}} / \text{g cm}^{-3}$ | 1.896                                                                         |
| $\mu / \text{mm}^{-1}$                | 1.304                                                                         |
| Formula Weight                        | 3585.21                                                                       |
| Colour                                | clear dark green                                                              |
| Shape                                 | block-shaped                                                                  |
| Size/ $\text{mm}^3$                   | $0.22 \times 0.20 \times 0.19$                                                |
| $T / \text{K}$                        | 292(2)                                                                        |
| Crystal System                        | triclinic                                                                     |
| Space Group                           | $P-1$                                                                         |
| $a / \text{ \AA}$                     | 14.9244(8)                                                                    |
| $b / \text{ \AA}$                     | 14.9531(9)                                                                    |
| $c / \text{ \AA}$                     | 16.6482(9)                                                                    |
| $\alpha / ^\circ$                     | 84.920(3)                                                                     |
| $\beta / ^\circ$                      | 66.901(2)                                                                     |
| $\gamma / ^\circ$                     | 67.164(2)                                                                     |
| $V / \text{ \AA}^3$                   | 3140.7(3)                                                                     |
| $Z$                                   | 1                                                                             |
| $Z'$                                  | 0.5                                                                           |
| Wavelength/ $\text{ \AA}$             | 0.71073                                                                       |
| Radiation type                        | MoK $\alpha$                                                                  |
| $\Theta_{\text{min}} / ^\circ$        | 2.457                                                                         |
| $\Theta_{\text{max}} / ^\circ$        | 24.999                                                                        |
| Measured Refl's.                      | 90355                                                                         |
| Indep't Refl's                        | 10960                                                                         |
| Refl's $I \geq 2 \sigma(I)$           | 9992                                                                          |
| $R_{\text{int}}$                      | 0.0363                                                                        |
| Parameters                            | 868                                                                           |
| Restraints                            | 526                                                                           |
| Largest Peak                          | 0.826                                                                         |
| Deepest Hole                          | -0.985                                                                        |
| GooF                                  | 1.362                                                                         |
| $wR_2$ (all data)                     | 0.1442                                                                        |
| $wR_2$                                | 0.1419                                                                        |
| $R_1$ (all data)                      | 0.0741                                                                        |
| $R_1$                                 | 0.0680                                                                        |

## Structure Quality Indicators

|                     |                                 |       |                        |      |                 |       |             |       |
|---------------------|---------------------------------|-------|------------------------|------|-----------------|-------|-------------|-------|
| <b>Reflections:</b> | d min (Mo)<br>2 $\theta$ =50.0° | 0.84  | I/ $\sigma$ (I)<br>CIF | 46.9 | Rint<br>CIF     | 3.63% | Full 50.0°  | 99.0  |
| <b>Refinement:</b>  | Shift<br>CIF                    | 0.001 | Max Peak<br>CIF        | 0.8  | Min Peak<br>CIF | -1.0  | Goof<br>CIF | 1.362 |

A clear dark green block-shaped crystal with dimensions  $0.22 \times 0.20 \times 0.19 \text{ mm}^3$  was mounted. Data were collected using a Bruker APEX-II CCD diffractometer operating at  $T = 292(2) \text{ K}$ .

Data were measured using  $\phi$  and  $\omega$  scans with  $\text{MoK}\alpha$  radiation. The maximum resolution that was achieved was  $\theta = 24.999^\circ$  ( $0.84 \text{ \AA}$ ).

The unit cell was refined using SAINT v8.34A (Bruker, 2013) on 9990 reflections, 11% of the observed reflections.

Data reduction, scaling and absorption corrections were performed using SAINT v8.34A (Bruker, 2013). The final completeness is 99.00 % out to  $24.999^\circ$  in  $\theta$ . SADABS-2008/1 (Bruker, 2008) was used for absorption correction.  $wR_2(\text{int})$  was 0.0725 before and 0.0497 after correction. The Ratio of minimum to maximum transmission is 0.6868. The  $\lambda/2$  correction factor is 0.0015. The absorption coefficient  $\mu$  of this material is  $1.304 \text{ mm}^{-1}$  at this wavelength ( $\lambda = 0.71073 \text{ \AA}$ ) and the minimum and maximum transmissions are 0.066 and 0.096.

The structure was solved and the space group  $P-1$  (# 2) determined by the ShelXT 2018/2 (Sheldrick, 2018) structure solution program using iterative methods and refined by full matrix least squares minimisation on  $F^2$  using version 2018/3 of ShelXL 2018/3 (Sheldrick, 2015). All non-hydrogen atoms were refined anisotropically. Hydrogen atom positions were calculated geometrically and refined using the riding model. Hydrogen atom positions were calculated geometrically and refined using the riding model.

*\_exptl\_absorpt\_process\_details:* SADABS-2008/1 (Bruker,2008) was used for absorption correction.  $wR_2(\text{int})$  was 0.0725 before and 0.0497 after correction. The Ratio of minimum to maximum transmission is 0.6868. The  $\lambda/2$  correction factor is 0.0015.

The value of  $Z'$  is 0.5. This means that only half of the formula unit is present in the asymmetric unit, with the other half consisting of symmetry equivalent atoms. The moiety formula is  $\text{Mo}_{12} \text{O}_{40} \text{P}_4(\text{C}_{24} \text{H}_{20} \text{N}_4 \text{O})_3$ .

## Data Plots: Diffraction Data

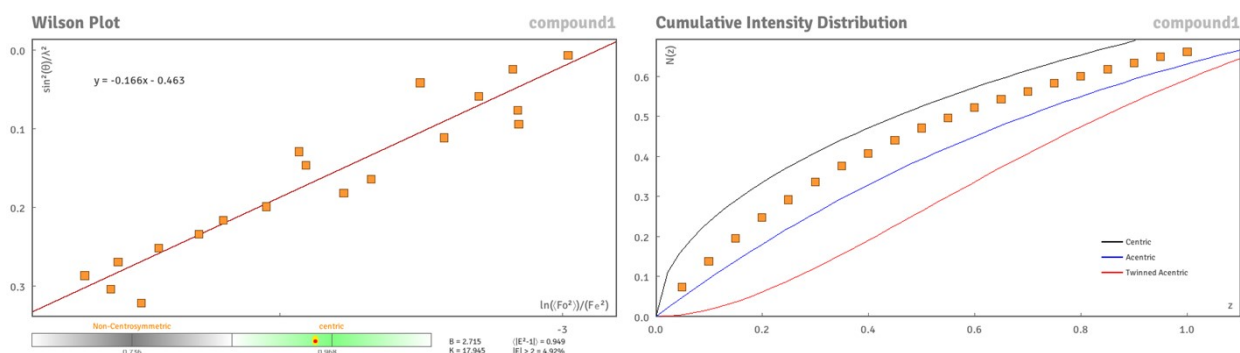

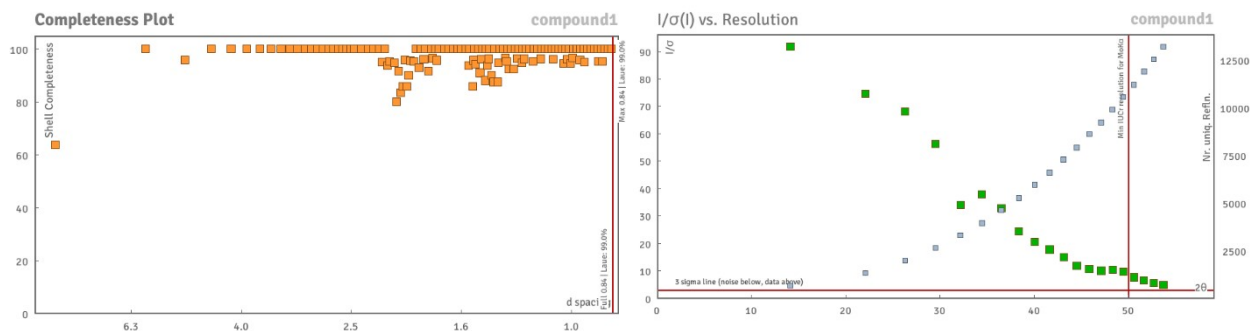

## Data Plots: Refinement and Data

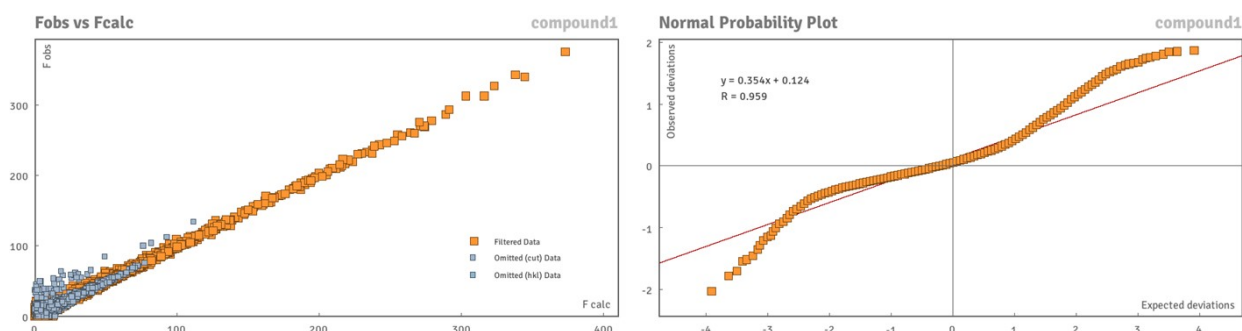

## Reflection Statistics

|                                     |                                                              |                            |                 |
|-------------------------------------|--------------------------------------------------------------|----------------------------|-----------------|
| Total reflections (after filtering) | 91400                                                        | Unique reflections         | 10960           |
| Completeness                        | 0.991                                                        | Mean $I/\sigma$            | 32.77           |
| $hkl_{\max}$ collected              | (19, 19, 21)                                                 | $hkl_{\min}$ collected     | (-19, -19, -21) |
| $hkl_{\max}$ used                   | (17, 17, 19)                                                 | $hkl_{\min}$ used          | (-15, -17, 0)   |
| Lim $d_{\max}$ collected            | 100.0                                                        | Lim $d_{\min}$ collected   | 0.84            |
| $d_{\max}$ used                     | 8.29                                                         | $d_{\min}$ used            | 0.84            |
| Friedel pairs                       | 13846                                                        | Friedel pairs merged       | 1               |
| Inconsistent equivalents            | 0                                                            | $R_{\text{int}}$           | 0.0363          |
| $R_{\text{sigma}}$                  | 0.0213                                                       | Intensity transformed      | 0               |
| Omitted reflections                 | 0                                                            | Omitted by user (OMIT hkl) | 1045            |
| Multiplicity                        | (934, 6346, 6875, 5192, 3563, 2530, 1356, 478, 249, 149, 28) | Maximum multiplicity       | 18              |
| Removed systematic absences         | 0                                                            | Filtered off (Shel/OMIT)   | 13969           |

There are no images if the crystal on the diffractometer, but the inclusion of these images has been requested from the GUI. Please uncheck the relevant box if you don't have these images!

**Table 1:** Fractional Atomic Coordinates ( $\times 10^4$ ) and Equivalent Isotropic Displacement Parameters ( $\text{\AA}^2 \times 10^3$ ) for **compound1**.  $U_{eq}$  is defined as 1/3 of the trace of the orthogonalised  $U_{ij}$ .

| Atom | x          | y          | z          | $U_{eq}$ |
|------|------------|------------|------------|----------|
| Mo6  | 1305.5(7)  | 7475.8(5)  | 4324.8(5)  | 34.8(2)  |
| Mo1  | 1413.0(6)  | 11543.7(6) | 4280.8(5)  | 33.7(2)  |
| Mo5  | -591.5(6)  | 9029.1(6)  | 3487.3(5)  | 34.8(2)  |
| Mo3  | 1045.9(6)  | 10381.6(6) | 2726.5(5)  | 35.7(2)  |
| Mo4  | -1711.5(6) | 11579.5(6) | 4011.9(6)  | 36.8(2)  |
| Mo2  | 2775.4(6)  | 8990.1(6)  | 3770.0(5)  | 36.4(2)  |
| P1   | 0          | 10000      | 5000       | 29.3(7)  |
| P3   | 6580(2)    | 6818.9(18) | 4728.6(17) | 37.7(6)  |
| P2   | 1405(2)    | 5490.5(19) | 675.0(17)  | 40.9(6)  |

| Atom | x         | y        | z        | $U_{eq}$ |
|------|-----------|----------|----------|----------|
| O20  | -2536(5)  | 12290(5) | 3557(5)  | 47.6(17) |
| O18  | 4067(5)   | 8482(5)  | 3176(5)  | 51.1(18) |
| O13  | -1372(5)  | 8680(6)  | 4546(5)  | 61(2)    |
| O11  | 635(6)    | 7937(6)  | 3568(5)  | 62(2)    |
| O22  | 1909(6)   | 6280(5)  | 4036(5)  | 60(2)    |
| O19  | 1518(6)   | 10602(5) | 1673(4)  | 53.4(18) |
| O14  | 2374(7)   | 7908(7)  | 3713(5)  | 69(2)    |
| O7   | 2226(6)   | 9446(5)  | 2849(5)  | 57.3(19) |
| O16  | 1621(7)   | 7533(7)  | 5361(5)  | 71(2)    |
| O12  | -34(6)    | 7557(6)  | 5226(5)  | 64(2)    |
| O6   | 2563(7)   | 10260(5) | 3991(6)  | 69(2)    |
| O21  | -800(6)   | 8517(6)  | 2767(5)  | 53.5(18) |
| O8   | -415(6)   | 11356(5) | 3116(7)  | 75(3)    |
| O5   | 1257(7)   | 11331(5) | 3266(5)  | 67(2)    |
| O15  | 2714(7)   | 8655(7)  | 4890(5)  | 67(2)    |
| O10  | 491(6)    | 9467(5)  | 2703(6)  | 67(2)    |
| O9   | -1548(6)  | 10293(5) | 3657(6)  | 72(2)    |
| O17  | 2094(6)   | 12259(6) | 3952(6)  | 67(2)    |
| C43  | 7991(7)   | 6184(7)  | 4338(6)  | 38(2)    |
| C31  | 6311(8)   | 8014(7)  | 4373(7)  | 41(2)    |
| C44  | 8634(8)   | 6644(7)  | 3812(6)  | 42(2)    |
| C37  | 6011(8)   | 6853(7)  | 5906(6)  | 40(2)    |
| C26  | 4984(8)   | 6689(7)  | 4364(6)  | 42(2)    |
| C45  | 9724(8)   | 6182(7)  | 3524(7)  | 47(2)    |
| C30  | 6506(8)   | 5233(7)  | 4037(7)  | 47(2)    |
| C19  | 2155(8)   | 5873(7)  | 1096(6)  | 42(2)    |
| C25  | 6016(8)   | 6212(7)  | 4316(6)  | 41(2)    |
| C27  | 4485(9)   | 6209(8)  | 4135(7)  | 52(3)    |
| C7   | 2310(8)   | 4766(7)  | -320(6)  | 44(2)    |
| C36  | 6175(10)  | 8235(9)  | 3583(8)  | 61(3)    |
| N1   | 5249(9)   | 8417(8)  | 405(8)   | 74(3)    |
| C13  | 423(9)    | 6538(7)  | 475(7)   | 49(3)    |
| C23  | 2365(10)  | 7086(9)  | 1772(8)  | 60(3)    |
| C32  | 6379(7)   | 8715(7)  | 4824(8)  | 46(2)    |
| C1   | 799(9)    | 4760(7)  | 1418(6)  | 47(2)    |
| C28  | 5009(9)   | 5245(9)  | 3853(7)  | 54(3)    |
| C33  | 6339(8)   | 9592(8)  | 4485(9)  | 59(3)    |
| C34  | 6220(10)  | 9788(8)  | 3710(10) | 70(4)    |
| C8   | 2245(9)   | 3924(8)  | -543(7)  | 53(3)    |
| C24  | 1781(9)   | 6807(8)  | 1451(7)  | 52(3)    |
| C48  | 8427(9)   | 5259(7)  | 4587(7)  | 50(3)    |
| C6   | 1447(11)  | 3942(9)  | 1684(8)  | 64(3)    |
| C14  | -414(9)   | 7161(8)  | 1169(9)  | 62(3)    |
| C46  | 10158(9)  | 5252(8)  | 3771(8)  | 55(3)    |
| C4   | -32(15)   | 3519(12) | 2499(9)  | 88(5)    |
| C42  | 4915(9)   | 7192(8)  | 6334(7)  | 54(3)    |
| O23  | 5909(9)   | 7171(8)  | -593(8)  | 105(4)   |
| C22  | 3316(11)  | 6419(9)  | 1757(9)  | 67(3)    |
| O4   | 1022(10)  | 9084(9)  | 4819(8)  | 39(2)    |
| C15  | -1127(11) | 7999(9)  | 993(11)  | 76(4)    |
| C5   | 1027(14)  | 3337(10) | 2223(9)  | 80(4)    |
| C41  | 4445(10)  | 7204(9)  | 7225(8)  | 65(3)    |
| C20  | 3144(10)  | 5206(9)  | 1042(9)  | 65(3)    |
| C47  | 9507(9)   | 4791(8)  | 4281(8)  | 57(3)    |
| C38  | 6615(9)   | 6559(9)  | 6400(8)  | 57(3)    |
| C2   | -259(9)   | 4930(8)  | 1673(7)  | 56(3)    |
| C29  | 5999(10)  | 4766(7)  | 3801(7)  | 54(3)    |
| C40  | 5065(10)  | 6895(9)  | 7699(8)  | 66(3)    |
| C10  | 3784(11)  | 3629(11) | -1850(9) | 78(4)    |
| C18  | 540(10)   | 6766(8)  | -378(8)  | 59(3)    |
| C3   | -673(12)  | 4314(11) | 2249(9)  | 77(4)    |
| C11  | 3822(12)  | 4496(11) | -1671(8) | 79(4)    |
| C39  | 6124(11)  | 6584(11) | 7296(8)  | 73(4)    |

| Atom | x         | y         | z         | $U_{eq}$ |
|------|-----------|-----------|-----------|----------|
| C16  | -1012(11) | 8213(9)   | 164(11)   | 79(4)    |
| C12  | 3104(10)  | 5055(10)  | -901(7)   | 64(3)    |
| C9   | 2986(11)  | 3369(9)   | -1315(8)  | 67(3)    |
| C35  | 6124(12)  | 9118(11)  | 3266(11)  | 88(5)    |
| C52  | 5518(11)  | 10681(7)  | 1482(8)   | 110(5)   |
| C51  | 6355(8)   | 10109(9)  | 753(9)    | 142(8)   |
| C50  | 6270(7)   | 9362(8)   | 386(6)    | 117(6)   |
| C49  | 5347(8)   | 9186(6)   | 748(6)    | 66(3)    |
| C54  | 4509(7)   | 9758(7)   | 1478(6)   | 88(4)    |
| C53  | 4595(9)   | 10505(7)  | 1845(6)   | 107(5)   |
| C17  | -198(13)  | 7604(10)  | -529(11)  | 82(4)    |
| C56  | 5945(13)  | 7872(10)  | -283(10)  | 84(4)    |
| C21  | 3737(13)  | 5495(13)  | 1361(13)  | 104(6)   |
| C55  | 4290(18)  | 8210(20)  | 841(15)   | 185(12)  |
| O2   | -221(9)   | 10153(8)  | 4136(8)   | 36(2)    |
| O3   | -118(10)  | 9120(8)   | 4766(8)   | 35(2)    |
| O24  | 2520(20)  | 7734(17)  | 9245(16)  | 118(8)   |
| C58  | -83(15)   | 10019(17) | 10774(12) | 88(8)    |
| C57  | 211(12)   | 9882(16)  | 9878(12)  | 63(4)    |
| C62  | -489(16)  | 10413(16) | 9491(9)   | 75(6)    |
| C61  | -1483(14) | 11082(15) | 10000(15) | 98(10)   |
| C60  | -1777(13) | 11219(16) | 10897(14) | 101(10)  |
| C59  | -1077(17) | 10687(17) | 11284(9)  | 90(8)    |
| O1   | 927(10)   | 10177(9)  | 4269(8)   | 38(2)    |
| C63  | 1680(30)  | 9280(30)  | 8458(19)  | 102(12)  |
| C64  | 1680(30)  | 8420(20)  | 9640(20)  | 81(8)    |
| N2   | 1188(15)  | 9227(16)  | 9347(14)  | 79(6)    |

**Table 2:** Anisotropic Displacement Parameters ( $\times 10^4$ ) for **compound1**. The anisotropic displacement factor exponent takes the form:  $-2\pi^2[h^2a^{*2} \times U_{11} + \dots + 2hka^* \times b^* \times U_{12}]$

| Atom | $U_{11}$ | $U_{22}$ | $U_{33}$ | $U_{23}$ | $U_{13}$  | $U_{12}$  |
|------|----------|----------|----------|----------|-----------|-----------|
| Mo6  | 43.2(5)  | 19.9(4)  | 39.0(5)  | 1.9(3)   | -17.6(4)  | -8.3(3)   |
| Mo1  | 37.3(4)  | 30.2(4)  | 41.6(5)  | 10.7(3)  | -17.5(4)  | -20.7(3)  |
| Mo5  | 36.6(4)  | 33.1(4)  | 39.3(5)  | -4.3(3)  | -17.2(4)  | -14.0(3)  |
| Mo3  | 38.2(5)  | 32.4(4)  | 26.4(4)  | 7.9(3)   | -6.7(3)   | -10.7(4)  |
| Mo4  | 33.1(4)  | 33.9(4)  | 48.5(5)  | 17.1(4)  | -24.4(4)  | -12.4(3)  |
| Mo2  | 23.2(4)  | 44.9(5)  | 33.7(4)  | 1.5(4)   | -7.6(3)   | -8.9(3)   |
| P1   | 29.3(16) | 26.9(16) | 32.2(17) | 6.0(13)  | -13.5(13) | -10.7(13) |
| P3   | 39.8(13) | 33.4(13) | 45.6(14) | 10.9(11) | -21.5(12) | -16.8(11) |
| P2   | 47.1(15) | 36.4(13) | 38.2(14) | 1.7(11)  | -19.2(12) | -12.4(11) |
| O20  | 49(4)    | 46(4)    | 59(4)    | 17(3)    | -36(4)    | -17(3)    |
| O18  | 32(4)    | 59(4)    | 51(4)    | -6(3)    | -13(3)    | -8(3)     |
| O13  | 37(4)    | 86(6)    | 45(4)    | 19(4)    | -18(3)    | -9(4)     |
| O11  | 43(4)    | 82(5)    | 40(4)    | 11(4)    | -17(3)    | -4(4)     |
| O22  | 80(5)    | 25(3)    | 47(4)    | 5(3)     | -8(4)     | -9(3)     |
| O19  | 69(5)    | 47(4)    | 38(4)    | 11(3)    | -18(3)    | -21(4)    |
| O14  | 99(6)    | 104(6)   | 41(4)    | 17(4)    | -31(4)    | -76(5)    |
| O7   | 71(5)    | 37(4)    | 65(4)    | -6(3)    | -48(4)    | 2(3)      |
| O16  | 112(7)   | 112(7)   | 45(4)    | 36(4)    | -44(5)    | -92(6)    |
| O12  | 47(4)    | 81(5)    | 46(4)    | 23(4)    | -18(3)    | -12(4)    |
| O6   | 88(6)    | 43(4)    | 83(6)    | -3(4)    | -65(5)    | 0(4)      |
| O21  | 51(4)    | 70(5)    | 43(4)    | -12(4)   | -18(3)    | -24(4)    |
| O8   | 41(4)    | 25(4)    | 129(7)   | 1(4)     | -2(4)     | -11(3)    |
| O5   | 100(6)   | 30(4)    | 79(5)    | 0(3)     | -68(5)    | -1(4)     |
| O15  | 99(6)    | 106(7)   | 44(4)    | 28(4)    | -37(4)    | -83(6)    |
| O10  | 38(4)    | 35(4)    | 100(6)   | -6(4)    | 2(4)      | -14(3)    |
| O9   | 39(4)    | 35(4)    | 120(7)   | -1(4)    | -4(4)     | -17(3)    |
| O17  | 70(5)    | 68(5)    | 96(6)    | 42(5)    | -51(5)    | -49(5)    |
| C43  | 40(5)    | 37(5)    | 42(5)    | 10(4)    | -23(4)    | -13(4)    |
| C31  | 42(5)    | 35(5)    | 48(6)    | 11(4)    | -22(5)    | -14(4)    |



| Atom | $U_{11}$ | $U_{22}$ | $U_{33}$ | $U_{23}$ | $U_{13}$ | $U_{12}$ |
|------|----------|----------|----------|----------|----------|----------|
| C44  | 55(6)    | 42(5)    | 41(5)    | 8(4)     | -19(5)   | -29(5)   |
| C37  | 52(6)    | 36(5)    | 44(6)    | 6(4)     | -24(5)   | -24(5)   |
| C26  | 46(6)    | 46(6)    | 43(6)    | 10(4)    | -27(5)   | -19(5)   |
| C45  | 41(6)    | 45(6)    | 52(6)    | 2(5)     | -15(5)   | -16(5)   |
| C30  | 50(6)    | 40(6)    | 48(6)    | 10(5)    | -18(5)   | -17(5)   |
| C19  | 51(6)    | 41(5)    | 37(5)    | 2(4)     | -17(5)   | -20(5)   |
| C25  | 45(6)    | 39(5)    | 48(6)    | 11(4)    | -19(5)   | -27(5)   |
| C27  | 45(6)    | 55(7)    | 61(7)    | 6(5)     | -26(5)   | -19(5)   |
| C7   | 48(6)    | 42(6)    | 38(5)    | -2(4)    | -20(5)   | -10(5)   |
| C36  | 79(9)    | 59(7)    | 55(7)    | 23(6)    | -35(6)   | -32(7)   |
| N1   | 72(6)    | 68(5)    | 77(6)    | -2(4)    | -30(5)   | -19(4)   |
| C13  | 57(7)    | 36(5)    | 61(7)    | 4(5)     | -33(6)   | -16(5)   |
| C23  | 67(8)    | 58(7)    | 55(7)    | -6(6)    | -12(6)   | -34(6)   |
| C32  | 33(5)    | 33(5)    | 70(7)    | 6(5)     | -23(5)   | -10(4)   |
| C1   | 61(7)    | 43(6)    | 36(5)    | 3(4)     | -18(5)   | -21(5)   |
| C28  | 68(8)    | 64(7)    | 53(7)    | 13(6)    | -34(6)   | -39(6)   |
| C33  | 43(6)    | 38(6)    | 93(10)   | -4(6)    | -27(6)   | -11(5)   |
| C34  | 64(8)    | 34(6)    | 103(11)  | 24(7)    | -27(8)   | -20(6)   |
| C8   | 63(7)    | 48(6)    | 43(6)    | -10(5)   | -21(5)   | -13(5)   |
| C24  | 46(6)    | 51(6)    | 51(6)    | 0(5)     | -12(5)   | -15(5)   |
| C48  | 55(7)    | 41(6)    | 64(7)    | 26(5)    | -35(6)   | -21(5)   |
| C6   | 74(8)    | 53(7)    | 55(7)    | 8(6)     | -17(6)   | -24(6)   |
| C14  | 48(7)    | 55(7)    | 80(9)    | -17(6)   | -26(6)   | -9(6)    |
| C46  | 46(6)    | 53(7)    | 65(7)    | -1(6)    | -30(6)   | -9(5)    |
| C4   | 132(15)  | 76(10)   | 65(9)    | 7(8)     | -14(10)  | -74(11)  |
| C42  | 49(6)    | 64(7)    | 44(6)    | -8(5)    | -18(5)   | -13(6)   |
| O23  | 117(9)   | 72(6)    | 121(9)   | -20(5)   | -56(7)   | -15(6)   |
| C22  | 89(10)   | 61(8)    | 81(9)    | 15(7)    | -53(8)   | -41(8)   |
| O4   | 41(5)    | 31(5)    | 45(7)    | 8(5)     | -24(5)   | -9(4)    |
| C15  | 73(9)    | 50(8)    | 100(11)  | -8(7)    | -41(8)   | -7(7)    |
| C5   | 115(13)  | 52(8)    | 59(8)    | 12(6)    | -23(8)   | -30(8)   |
| C41  | 54(7)    | 74(9)    | 59(8)    | -13(6)   | -14(6)   | -21(6)   |
| C20  | 60(7)    | 47(7)    | 91(10)   | -3(6)    | -40(7)   | -11(6)   |
| C47  | 63(7)    | 37(6)    | 79(8)    | 12(6)    | -45(7)   | -11(5)   |
| C38  | 55(7)    | 71(8)    | 54(7)    | 11(6)    | -24(6)   | -31(6)   |
| C2   | 57(7)    | 54(7)    | 53(7)    | -2(5)    | -11(6)   | -26(6)   |
| C29  | 71(8)    | 32(5)    | 62(7)    | -2(5)    | -27(6)   | -20(5)   |
| C40  | 68(8)    | 74(9)    | 53(7)    | -6(6)    | -17(6)   | -29(7)   |
| C10  | 64(8)    | 95(11)   | 54(8)    | -28(7)   | -9(7)    | -15(8)   |
| C18  | 72(8)    | 46(6)    | 71(8)    | 9(6)     | -45(7)   | -18(6)   |
| C3   | 87(10)   | 85(10)   | 61(8)    | -8(7)    | -7(7)    | -56(9)   |
| C11  | 88(10)   | 103(11)  | 42(7)    | -6(7)    | -11(7)   | -45(9)   |
| C39  | 84(10)   | 95(10)   | 54(8)    | 19(7)    | -42(7)   | -35(8)   |
| C16  | 78(9)    | 43(7)    | 120(13)  | -9(8)    | -64(10)  | 2(7)     |
| C12  | 77(9)    | 73(8)    | 47(7)    | 3(6)     | -18(6)   | -40(7)   |
| C9   | 79(9)    | 62(8)    | 59(8)    | -15(6)   | -27(7)   | -22(7)   |
| C35  | 91(11)   | 89(11)   | 102(12)  | 55(10)   | -60(10)  | -39(9)   |
| C52  | 168(12)  | 72(9)    | 115(11)  | 13(7)    | -92(9)   | -35(8)   |
| C51  | 150(12)  | 122(12)  | 169(13)  | -24(10)  | -55(10)  | -67(9)   |
| C50  | 90(7)    | 105(11)  | 143(12)  | -32(9)   | -19(7)   | -43(8)   |
| C49  | 74(6)    | 60(5)    | 62(6)    | 8(4)     | -36(4)   | -15(4)   |
| C54  | 110(8)   | 64(7)    | 66(6)    | 4(5)     | -21(5)   | -22(6)   |
| C53  | 156(11)  | 67(8)    | 90(9)    | 2(6)     | -61(8)   | -21(8)   |
| C17  | 112(12)  | 63(9)    | 104(12)  | 24(8)    | -85(11)  | -26(9)   |
| C56  | 88(8)    | 67(6)    | 85(7)    | -9(5)    | -30(5)   | -17(6)   |
| C21  | 88(11)   | 107(13)  | 148(17)  | 13(12)   | -77(12)  | -39(10)  |
| C55  | 152(12)  | 250(30)  | 149(17)  | -79(17)  | 22(12)   | -141(17) |
| O2   | 34(6)    | 25(5)    | 42(5)    | 3(4)     | -15(5)   | -4(5)    |
| O3   | 42(6)    | 24(5)    | 44(6)    | 4(4)     | -16(5)   | -19(5)   |
| O24  | 110(14)  | 94(13)   | 104(15)  | 27(11)   | -20(12)  | -19(9)   |
| C58  | 94(14)   | 110(20)  | 67(9)    | 8(9)     | -33(8)   | -41(12)  |
| C57  | 73(10)   | 71(10)   | 66(8)    | 14(8)    | -30(7)   | -46(7)   |
| C62  | 75(10)   | 87(15)   | 75(11)   | 20(11)   | -34(9)   | -41(9)   |

| Atom | $U_{11}$ | $U_{22}$ | $U_{33}$ | $U_{23}$ | $U_{13}$ | $U_{12}$ |
|------|----------|----------|----------|----------|----------|----------|
| C61  | 83(11)   | 110(20)  | 90(12)   | 13(13)   | -28(10)  | -31(11)  |
| C60  | 87(15)   | 120(20)  | 90(12)   | 11(13)   | -25(11)  | -43(14)  |
| C59  | 92(14)   | 101(19)  | 82(12)   | 2(12)    | -28(9)   | -49(12)  |
| O1   | 37(6)    | 35(6)    | 37(6)    | 0(4)     | -4(4)    | -18(5)   |
| C63  | 84(18)   | 120(30)  | 68(10)   | 31(10)   | -23(9)   | -17(17)  |
| C64  | 93(14)   | 83(12)   | 67(13)   | 21(10)   | -36(10)  | -32(9)   |
| N2   | 81(10)   | 84(11)   | 67(9)    | 24(8)    | -26(8)   | -33(8)   |

**Table 3:** Bond Lengths in Å for **compound1**.

| Atom | Atom             | Length/Å  | Atom | Atom | Length/Å  |
|------|------------------|-----------|------|------|-----------|
| Mo6  | O11              | 1.834(7)  | P3   | C31  | 1.774(9)  |
| Mo6  | O22              | 1.674(7)  | P3   | C37  | 1.801(10) |
| Mo6  | O14              | 1.845(8)  | P3   | C25  | 1.777(9)  |
| Mo6  | O16              | 1.975(7)  | P2   | C19  | 1.805(10) |
| Mo6  | O12              | 1.936(7)  | P2   | C7   | 1.780(10) |
| Mo6  | O4               | 2.435(12) | P2   | C13  | 1.794(10) |
| Mo6  | O3               | 2.478(12) | P2   | C1   | 1.786(11) |
| Mo1  | O13 <sup>1</sup> | 1.932(7)  | C43  | C44  | 1.380(13) |
| Mo1  | O12 <sup>1</sup> | 1.855(8)  | C43  | C48  | 1.386(13) |
| Mo1  | O6               | 1.955(7)  | C31  | C36  | 1.400(14) |
| Mo1  | O5               | 1.863(7)  | C31  | C32  | 1.399(14) |
| Mo1  | O17              | 1.668(7)  | C44  | C45  | 1.389(14) |
| Mo1  | O3 <sup>1</sup>  | 2.458(12) | C37  | C42  | 1.396(14) |
| Mo1  | O1               | 2.424(12) | C37  | C38  | 1.375(14) |
| Mo5  | O13              | 1.853(7)  | C26  | C25  | 1.396(13) |
| Mo5  | O11              | 1.967(7)  | C26  | C27  | 1.379(14) |
| Mo5  | O21              | 1.663(7)  | C45  | C46  | 1.390(15) |
| Mo5  | O10              | 1.938(7)  | C30  | C25  | 1.385(14) |
| Mo5  | O9               | 1.836(7)  | C30  | C29  | 1.380(15) |
| Mo5  | O2               | 2.409(12) | C19  | C24  | 1.375(14) |
| Mo5  | O3               | 2.521(12) | C19  | C20  | 1.397(15) |
| Mo3  | O19              | 1.671(7)  | C27  | C28  | 1.367(15) |
| Mo3  | O7               | 1.849(7)  | C7   | C8   | 1.392(14) |
| Mo3  | O8               | 1.972(7)  | C7   | C12  | 1.397(15) |
| Mo3  | O5               | 1.928(7)  | C36  | C35  | 1.362(17) |
| Mo3  | O10              | 1.864(7)  | N1   | C49  | 1.408(13) |
| Mo3  | O2               | 2.466(12) | N1   | C56  | 1.277(17) |
| Mo3  | O1               | 2.503(13) | N1   | C55  | 1.47(2)   |
| Mo4  | O20              | 1.671(6)  | C13  | C14  | 1.385(15) |
| Mo4  | O16 <sup>1</sup> | 1.834(8)  | C13  | C18  | 1.390(15) |
| Mo4  | O8               | 1.845(8)  | C23  | C24  | 1.381(16) |
| Mo4  | O15 <sup>1</sup> | 1.962(7)  | C23  | C22  | 1.374(17) |
| Mo4  | O9               | 1.958(8)  | C32  | C33  | 1.369(15) |
| Mo4  | O4 <sup>1</sup>  | 2.504(12) | C1   | C6   | 1.396(15) |
| Mo4  | O2               | 2.478(11) | C1   | C2   | 1.385(15) |
| Mo2  | O18              | 1.664(7)  | C28  | C29  | 1.338(16) |
| Mo2  | O14              | 1.953(8)  | C33  | C34  | 1.360(18) |
| Mo2  | O7               | 1.964(7)  | C34  | C35  | 1.38(2)   |
| Mo2  | O6               | 1.845(8)  | C8   | C9   | 1.387(15) |
| Mo2  | O15              | 1.863(7)  | C48  | C47  | 1.375(15) |
| Mo2  | O4               | 2.467(13) | C6   | C5   | 1.368(17) |
| Mo2  | O1               | 2.473(12) | C14  | C15  | 1.390(17) |
| P1   | O4               | 1.544(12) | C46  | C47  | 1.381(16) |
| P1   | O4 <sup>1</sup>  | 1.544(12) | C4   | C5   | 1.38(2)   |
| P1   | O2               | 1.577(12) | C4   | C3   | 1.36(2)   |
| P1   | O2 <sup>1</sup>  | 1.577(12) | C42  | C41  | 1.368(16) |
| P1   | O3               | 1.497(11) | O23  | C56  | 1.236(17) |
| P1   | O3 <sup>1</sup>  | 1.497(11) | C22  | C21  | 1.38(2)   |
| P1   | O1               | 1.539(12) | C15  | C16  | 1.35(2)   |
| P1   | O1 <sup>1</sup>  | 1.539(12) | C41  | C40  | 1.367(17) |
| P3   | C43              | 1.802(10) | C20  | C21  | 1.399(18) |

| Atom | Atom | Length/Å  |
|------|------|-----------|
| C38  | C39  | 1.376(16) |
| C2   | C3   | 1.405(17) |
| C40  | C39  | 1.347(18) |
| C10  | C11  | 1.383(19) |
| C10  | C9   | 1.352(18) |
| C18  | C17  | 1.392(16) |
| C11  | C12  | 1.381(17) |
| C16  | C17  | 1.37(2)   |
| C52  | C51  | 1.3900    |
| C52  | C53  | 1.3900    |
| C51  | C50  | 1.3900    |
| C50  | C49  | 1.3900    |
| C49  | C54  | 1.3900    |

| Atom                                              | Atom | Length/Å  |
|---------------------------------------------------|------|-----------|
| C54                                               | C53  | 1.3900    |
| O24                                               | C64  | 1.24(4)   |
| C58                                               | C57  | 1.3900    |
| C58                                               | C59  | 1.3900    |
| C57                                               | C62  | 1.3900    |
| C57                                               | N2   | 1.378(17) |
| C62                                               | C61  | 1.3900    |
| C61                                               | C60  | 1.3900    |
| C60                                               | C59  | 1.3900    |
| C63                                               | N2   | 1.38(3)   |
| C64                                               | N2   | 1.31(3)   |
| ----                                              |      |           |
| <sup>1</sup> -x, <sup>2</sup> -y, <sup>1</sup> -z |      |           |

**Table 4:** Bond Angles in ° for **compound1**.

| Atom             | Atom | Atom             | Angle/°  |
|------------------|------|------------------|----------|
| O11              | Mo6  | O14              | 93.6(4)  |
| O11              | Mo6  | O16              | 155.9(4) |
| O11              | Mo6  | O12              | 88.6(3)  |
| O11              | Mo6  | O4               | 94.3(4)  |
| O11              | Mo6  | O3               | 65.2(4)  |
| O22              | Mo6  | O11              | 102.8(4) |
| O22              | Mo6  | O14              | 101.9(4) |
| O22              | Mo6  | O16              | 100.7(4) |
| O22              | Mo6  | O12              | 101.5(4) |
| O22              | Mo6  | O4               | 159.0(4) |
| O22              | Mo6  | O3               | 159.7(4) |
| O14              | Mo6  | O16              | 86.8(3)  |
| O14              | Mo6  | O12              | 155.4(4) |
| O14              | Mo6  | O4               | 64.5(4)  |
| O14              | Mo6  | O3               | 95.4(4)  |
| O16              | Mo6  | O4               | 64.2(4)  |
| O16              | Mo6  | O3               | 90.8(4)  |
| O12              | Mo6  | O16              | 81.5(3)  |
| O12              | Mo6  | O4               | 91.0(4)  |
| O12              | Mo6  | O3               | 63.4(4)  |
| O4               | Mo6  | O3               | 40.9(4)  |
| O13 <sup>1</sup> | Mo1  | O6               | 83.5(3)  |
| O13 <sup>1</sup> | Mo1  | O3 <sup>1</sup>  | 63.9(4)  |
| O13 <sup>1</sup> | Mo1  | O1               | 90.9(4)  |
| O12 <sup>1</sup> | Mo1  | O13 <sup>1</sup> | 88.0(3)  |
| O12 <sup>1</sup> | Mo1  | O6               | 156.9(4) |
| O12 <sup>1</sup> | Mo1  | O5               | 92.3(4)  |
| O12 <sup>1</sup> | Mo1  | O3 <sup>1</sup>  | 64.8(4)  |
| O12 <sup>1</sup> | Mo1  | O1               | 94.9(4)  |
| O6               | Mo1  | O3 <sup>1</sup>  | 92.3(4)  |
| O6               | Mo1  | O1               | 63.9(4)  |
| O5               | Mo1  | O13 <sup>1</sup> | 155.8(4) |
| O5               | Mo1  | O6               | 86.9(3)  |
| O5               | Mo1  | O3 <sup>1</sup>  | 94.4(4)  |
| O5               | Mo1  | O1               | 64.9(4)  |
| O17              | Mo1  | O13 <sup>1</sup> | 101.7(4) |
| O17              | Mo1  | O12 <sup>1</sup> | 102.1(4) |
| O17              | Mo1  | O6               | 100.6(4) |
| O17              | Mo1  | O5               | 101.9(4) |
| O17              | Mo1  | O3 <sup>1</sup>  | 159.6(4) |
| O17              | Mo1  | O1               | 159.1(4) |
| O1               | Mo1  | O3 <sup>1</sup>  | 41.1(4)  |
| O13              | Mo5  | O11              | 85.8(3)  |
| O13              | Mo5  | O10              | 155.6(4) |
| O13              | Mo5  | O2               | 94.9(4)  |

| Atom | Atom | Atom             | Angle/°  |
|------|------|------------------|----------|
| O13  | Mo5  | O3               | 63.4(4)  |
| O11  | Mo5  | O2               | 90.9(4)  |
| O11  | Mo5  | O3               | 62.8(4)  |
| O21  | Mo5  | O13              | 102.7(4) |
| O21  | Mo5  | O11              | 99.5(4)  |
| O21  | Mo5  | O10              | 100.3(4) |
| O21  | Mo5  | O9               | 103.8(4) |
| O21  | Mo5  | O2               | 160.1(4) |
| O21  | Mo5  | O3               | 156.9(4) |
| O10  | Mo5  | O11              | 82.5(3)  |
| O10  | Mo5  | O2               | 64.0(4)  |
| O10  | Mo5  | O3               | 92.3(4)  |
| O9   | Mo5  | O13              | 93.8(4)  |
| O9   | Mo5  | O11              | 156.2(4) |
| O9   | Mo5  | O10              | 88.5(3)  |
| O9   | Mo5  | O2               | 65.4(4)  |
| O9   | Mo5  | O3               | 95.7(4)  |
| O2   | Mo5  | O3               | 42.2(4)  |
| O19  | Mo3  | O7               | 102.5(4) |
| O19  | Mo3  | O8               | 100.5(4) |
| O19  | Mo3  | O5               | 101.1(4) |
| O19  | Mo3  | O10              | 102.5(4) |
| O19  | Mo3  | O2               | 158.3(4) |
| O19  | Mo3  | O1               | 158.2(4) |
| O7   | Mo3  | O8               | 156.6(4) |
| O7   | Mo3  | O5               | 88.2(3)  |
| O7   | Mo3  | O10              | 92.5(3)  |
| O7   | Mo3  | O2               | 95.1(4)  |
| O7   | Mo3  | O1               | 64.9(4)  |
| O8   | Mo3  | O2               | 63.6(4)  |
| O8   | Mo3  | O1               | 91.9(4)  |
| O5   | Mo3  | O8               | 83.2(4)  |
| O5   | Mo3  | O2               | 92.0(4)  |
| O5   | Mo3  | O1               | 62.4(4)  |
| O10  | Mo3  | O8               | 86.6(3)  |
| O10  | Mo3  | O5               | 155.6(4) |
| O10  | Mo3  | O2               | 63.7(4)  |
| O10  | Mo3  | O1               | 96.0(4)  |
| O2   | Mo3  | O1               | 43.1(4)  |
| O20  | Mo4  | O16 <sup>1</sup> | 102.4(4) |
| O20  | Mo4  | O8               | 101.6(4) |
| O20  | Mo4  | O15 <sup>1</sup> | 100.7(4) |
| O20  | Mo4  | O9               | 100.4(4) |
| O20  | Mo4  | O4 <sup>1</sup>  | 158.5(4) |
| O20  | Mo4  | O2               | 157.4(4) |

| Atom             | Atom | Atom             | Angle/°  |
|------------------|------|------------------|----------|
| O16 <sup>1</sup> | Mo4  | O8               | 94.3(4)  |
| O16 <sup>1</sup> | Mo4  | O15 <sup>1</sup> | 88.1(3)  |
| O16 <sup>1</sup> | Mo4  | O9               | 156.4(4) |
| O16 <sup>1</sup> | Mo4  | O4 <sup>1</sup>  | 64.3(4)  |
| O16 <sup>1</sup> | Mo4  | O2               | 96.7(4)  |
| O8               | Mo4  | O15 <sup>1</sup> | 156.5(4) |
| O8               | Mo4  | O9               | 86.8(3)  |
| O8               | Mo4  | O4 <sup>1</sup>  | 96.4(4)  |
| O8               | Mo4  | O2               | 64.8(4)  |
| O15 <sup>1</sup> | Mo4  | O4 <sup>1</sup>  | 63.7(4)  |
| O15 <sup>1</sup> | Mo4  | O2               | 91.7(4)  |
| O9               | Mo4  | O15 <sup>1</sup> | 81.9(3)  |
| O9               | Mo4  | O4 <sup>1</sup>  | 92.1(4)  |
| O9               | Mo4  | O2               | 62.4(4)  |
| O2               | Mo4  | O4 <sup>1</sup>  | 43.6(4)  |
| O18              | Mo2  | O14              | 99.8(4)  |
| O18              | Mo2  | O7               | 101.1(3) |
| O18              | Mo2  | O6               | 103.1(4) |
| O18              | Mo2  | O15              | 101.6(4) |
| O18              | Mo2  | O4               | 157.5(4) |
| O18              | Mo2  | O1               | 159.7(4) |
| O14              | Mo2  | O7               | 82.6(3)  |
| O14              | Mo2  | O4               | 62.5(4)  |
| O14              | Mo2  | O1               | 92.4(4)  |
| O7               | Mo2  | O4               | 90.9(4)  |
| O7               | Mo2  | O1               | 64.3(4)  |
| O6               | Mo2  | O14              | 156.5(4) |
| O6               | Mo2  | O7               | 87.8(3)  |
| O6               | Mo2  | O15              | 93.2(4)  |
| O6               | Mo2  | O4               | 96.4(4)  |
| O6               | Mo2  | O1               | 64.1(4)  |
| O15              | Mo2  | O14              | 87.4(3)  |
| O15              | Mo2  | O7               | 156.4(4) |
| O15              | Mo2  | O4               | 65.6(4)  |
| O15              | Mo2  | O1               | 95.0(4)  |
| O4               | Mo2  | O1               | 42.3(4)  |
| O4 <sup>1</sup>  | P1   | O4               | 180.0    |
| O4               | P1   | O2               | 107.3(6) |
| O4 <sup>1</sup>  | P1   | O2               | 72.7(6)  |
| O4 <sup>1</sup>  | P1   | O2 <sup>1</sup>  | 107.3(6) |
| O4               | P1   | O2 <sup>1</sup>  | 72.7(6)  |
| O2 <sup>1</sup>  | P1   | O2               | 180.0    |
| O3               | P1   | O4               | 68.8(7)  |
| O3               | P1   | O4 <sup>1</sup>  | 111.2(7) |
| O3 <sup>1</sup>  | P1   | O4               | 111.2(7) |
| O3 <sup>1</sup>  | P1   | O4 <sup>1</sup>  | 68.8(7)  |
| O3 <sup>1</sup>  | P1   | O2               | 109.3(6) |
| O3               | P1   | O2 <sup>1</sup>  | 109.3(6) |
| O3 <sup>1</sup>  | P1   | O2 <sup>1</sup>  | 70.7(6)  |
| O3               | P1   | O2               | 70.7(6)  |
| O3               | P1   | O3 <sup>1</sup>  | 180.0    |
| O3 <sup>1</sup>  | P1   | O1               | 68.7(6)  |
| O3               | P1   | O1 <sup>1</sup>  | 68.7(6)  |
| O3 <sup>1</sup>  | P1   | O1 <sup>1</sup>  | 111.3(6) |
| O3               | P1   | O1               | 111.3(6) |
| O1 <sup>1</sup>  | P1   | O4               | 109.3(7) |
| O1               | P1   | O4               | 70.7(7)  |
| O1 <sup>1</sup>  | P1   | O4 <sup>1</sup>  | 70.7(7)  |
| O1               | P1   | O4 <sup>1</sup>  | 109.3(7) |
| O1               | P1   | O2               | 71.7(7)  |
| O1 <sup>1</sup>  | P1   | O2               | 108.3(7) |
| O1 <sup>1</sup>  | P1   | O2 <sup>1</sup>  | 71.7(7)  |
| O1               | P1   | O2 <sup>1</sup>  | 108.3(7) |

| Atom             | Atom | Atom             | Angle/°   |
|------------------|------|------------------|-----------|
| O1 <sup>1</sup>  | P1   | O1               | 180.0     |
| C31              | P3   | C43              | 108.0(5)  |
| C31              | P3   | C37              | 110.7(5)  |
| C31              | P3   | C25              | 110.0(5)  |
| C37              | P3   | C43              | 109.6(5)  |
| C25              | P3   | C43              | 110.8(5)  |
| C25              | P3   | C37              | 107.7(4)  |
| C7               | P2   | C19              | 107.2(5)  |
| C7               | P2   | C13              | 110.3(5)  |
| C7               | P2   | C1               | 108.3(5)  |
| C13              | P2   | C19              | 109.7(5)  |
| C1               | P2   | C19              | 111.0(5)  |
| C1               | P2   | C13              | 110.4(5)  |
| Mo5              | O13  | Mo1 <sup>1</sup> | 140.8(4)  |
| Mo6              | O11  | Mo5              | 140.1(4)  |
| Mo6              | O14  | Mo2              | 139.4(5)  |
| Mo3              | O7   | Mo2              | 138.5(4)  |
| Mo4 <sup>1</sup> | O16  | Mo6              | 138.7(5)  |
| Mo1 <sup>1</sup> | O12  | Mo6              | 138.8(4)  |
| Mo2              | O6   | Mo1              | 138.5(5)  |
| Mo4              | O8   | Mo3              | 138.8(5)  |
| Mo1              | O5   | Mo3              | 139.6(5)  |
| Mo2              | O15  | Mo4 <sup>1</sup> | 138.2(4)  |
| Mo3              | O10  | Mo5              | 138.2(5)  |
| Mo5              | O9   | Mo4              | 138.6(5)  |
| C44              | C43  | P3               | 119.2(7)  |
| C44              | C43  | C48              | 120.4(9)  |
| C48              | C43  | P3               | 120.4(8)  |
| C36              | C31  | P3               | 121.2(8)  |
| C32              | C31  | P3               | 119.4(8)  |
| C32              | C31  | C36              | 118.8(9)  |
| C43              | C44  | C45              | 120.3(9)  |
| C42              | C37  | P3               | 118.7(8)  |
| C38              | C37  | P3               | 122.6(8)  |
| C38              | C37  | C42              | 118.7(10) |
| C27              | C26  | C25              | 121.5(10) |
| C44              | C45  | C46              | 119.1(10) |
| C29              | C30  | C25              | 121.2(10) |
| C24              | C19  | P2               | 121.4(8)  |
| C24              | C19  | C20              | 119.8(10) |
| C20              | C19  | P2               | 118.7(8)  |
| C26              | C25  | P3               | 120.1(8)  |
| C30              | C25  | P3               | 123.0(8)  |
| C30              | C25  | C26              | 116.5(9)  |
| C28              | C27  | C26              | 119.5(10) |
| C8               | C7   | P2               | 122.1(8)  |
| C8               | C7   | C12              | 118.8(10) |
| C12              | C7   | P2               | 119.1(8)  |
| C35              | C36  | C31              | 119.7(13) |
| C49              | N1   | C55              | 119.8(13) |
| C56              | N1   | C49              | 124.4(13) |
| C56              | N1   | C55              | 115.9(15) |
| C14              | C13  | P2               | 120.1(9)  |
| C14              | C13  | C18              | 119.6(11) |
| C18              | C13  | P2               | 120.1(9)  |
| C22              | C23  | C24              | 119.7(11) |
| C33              | C32  | C31              | 120.3(11) |
| C6               | C1   | P2               | 117.8(9)  |
| C2               | C1   | P2               | 122.3(9)  |
| C2               | C1   | C6               | 119.6(11) |
| C29              | C28  | C27              | 120.5(10) |
| C34              | C33  | C32              | 120.1(11) |
| C33              | C34  | C35              | 120.7(11) |

| Atom | Atom | Atom             | Angle/°   | Atom             | Atom | Atom             | Angle/°   |
|------|------|------------------|-----------|------------------|------|------------------|-----------|
| C9   | C8   | C7               | 120.0(12) | C54              | C53  | C52              | 120.0     |
| C19  | C24  | C23              | 120.6(11) | C16              | C17  | C18              | 119.6(14) |
| C47  | C48  | C43              | 119.3(10) | O23              | C56  | N1               | 126.6(17) |
| C5   | C6   | C1               | 120.0(13) | C22              | C21  | C20              | 119.5(14) |
| C13  | C14  | C15              | 118.9(13) | Mo5              | O2   | Mo3              | 93.6(4)   |
| C47  | C46  | C45              | 120.0(10) | Mo5              | O2   | Mo4              | 93.1(4)   |
| C3   | C4   | C5               | 120.1(13) | Mo3              | O2   | Mo4              | 92.6(4)   |
| C41  | C42  | C37              | 121.0(11) | P1               | O2   | Mo5              | 124.7(6)  |
| C23  | C22  | C21              | 120.8(12) | P1               | O2   | Mo3              | 122.7(6)  |
| Mo6  | O4   | Mo4 <sup>1</sup> | 92.4(4)   | P1               | O2   | Mo4              | 121.7(6)  |
| Mo6  | O4   | Mo2              | 93.2(4)   | Mo6              | O3   | Mo5              | 91.3(4)   |
| Mo2  | O4   | Mo4 <sup>1</sup> | 91.9(4)   | Mo1 <sup>1</sup> | O3   | Mo6              | 92.0(4)   |
| P1   | O4   | Mo6              | 125.1(7)  | Mo1 <sup>1</sup> | O3   | Mo5              | 91.5(4)   |
| P1   | O4   | Mo4 <sup>1</sup> | 121.9(7)  | P1               | O3   | Mo6              | 125.0(7)  |
| P1   | O4   | Mo2              | 123.4(7)  | P1               | O3   | Mo1 <sup>1</sup> | 125.2(7)  |
| C16  | C15  | C14              | 121.2(13) | P1               | O3   | Mo5              | 122.2(6)  |
| C6   | C5   | C4               | 120.6(14) | C57              | C58  | C59              | 120.0     |
| C40  | C41  | C42              | 119.0(12) | C58              | C57  | C62              | 120.0     |
| C19  | C20  | C21              | 119.3(12) | N2               | C57  | C58              | 122.0(18) |
| C48  | C47  | C46              | 120.9(10) | N2               | C57  | C62              | 118.0(18) |
| C37  | C38  | C39              | 119.1(11) | C61              | C62  | C57              | 120.0     |
| C1   | C2   | C3               | 118.9(12) | C60              | C61  | C62              | 120.0     |
| C28  | C29  | C30              | 120.7(10) | C61              | C60  | C59              | 120.0     |
| C39  | C40  | C41              | 120.6(12) | C60              | C59  | C58              | 120.0     |
| C9   | C10  | C11              | 120.3(12) | Mo1              | O1   | Mo3              | 92.5(4)   |
| C13  | C18  | C17              | 119.8(13) | Mo1              | O1   | Mo2              | 93.1(4)   |
| C4   | C3   | C2               | 120.6(14) | Mo2              | O1   | Mo3              | 91.6(4)   |
| C12  | C11  | C10              | 120.0(13) | P1               | O1   | Mo1              | 124.9(7)  |
| C40  | C39  | C38              | 121.5(12) | P1               | O1   | Mo3              | 122.4(7)  |
| C15  | C16  | C17              | 120.8(12) | P1               | O1   | Mo2              | 123.4(7)  |
| C11  | C12  | C7               | 120.0(12) | P1               | O1   | O3 <sup>1</sup>  | 54.5(5)   |
| C10  | C9   | C8               | 120.6(12) | O3 <sup>1</sup>  | O1   | Mo1              | 70.5(6)   |
| C36  | C35  | C34              | 120.5(13) | O3 <sup>1</sup>  | O1   | Mo3              | 133.6(8)  |
| C51  | C52  | C53              | 120.0     | O3 <sup>1</sup>  | O1   | Mo2              | 130.8(8)  |
| C52  | C51  | C50              | 120.0     | O24              | C64  | N2               | 129(3)    |
| C49  | C50  | C51              | 120.0     | C57              | N2   | C63              | 125(2)    |
| C50  | C49  | N1               | 121.2(8)  | C64              | N2   | C57              | 121(2)    |
| C54  | C49  | N1               | 118.8(8)  | C64              | N2   | C63              | 114(3)    |
| C54  | C49  | C50              | 120.0     | ----             |      |                  |           |
| C49  | C54  | C53              | 120.0     |                  |      |                  |           |

<sup>1</sup>-x,2-y,1-z

**Table 5:** Torsion Angles in ° for **compound1**.

| Atom             | Atom | Atom | Atom             | Angle/°    |
|------------------|------|------|------------------|------------|
| P3               | C43  | C44  | C45              | 178.0(8)   |
| P3               | C43  | C48  | C47              | -179.8(9)  |
| P3               | C31  | C36  | C35              | -170.4(11) |
| P3               | C31  | C32  | C33              | 169.7(8)   |
| P3               | C37  | C42  | C41              | 177.9(9)   |
| P3               | C37  | C38  | C39              | -178.5(10) |
| P2               | C19  | C24  | C23              | 179.9(9)   |
| P2               | C19  | C20  | C21              | 179.6(12)  |
| P2               | C7   | C8   | C9               | -178.2(9)  |
| P2               | C7   | C12  | C11              | 179.1(10)  |
| P2               | C13  | C14  | C15              | 176.0(9)   |
| P2               | C13  | C18  | C17              | -177.0(10) |
| P2               | C1   | C6   | C5               | -177.2(10) |
| P2               | C1   | C2   | C3               | 179.0(9)   |
| O20              | Mo4  | O8   | Mo3              | -156.2(8)  |
| O18              | Mo2  | O6   | Mo1              | 156.2(7)   |
| O18              | Mo2  | O15  | Mo4 <sup>1</sup> | -152.2(7)  |
| O13 <sup>1</sup> | Mo1  | O5   | Mo3              | -12.5(14)  |

| Atom             | Atom | Atom | Atom             | Angle/°   |
|------------------|------|------|------------------|-----------|
| O13              | Mo5  | O9   | Mo4              | 101.6(8)  |
| O11              | Mo6  | O14  | Mo2              | 100.1(7)  |
| O11              | Mo5  | O13  | Mo1 <sup>1</sup> | 54.4(7)   |
| O11              | Mo5  | O9   | Mo4              | 13.5(14)  |
| O22              | Mo6  | O11  | Mo5              | 154.3(7)  |
| O22              | Mo6  | O14  | Mo2              | -156.0(7) |
| O19              | Mo3  | O7   | Mo2              | 152.2(7)  |
| O19              | Mo3  | O10  | Mo5              | -154.2(7) |
| O14              | Mo6  | O11  | Mo5              | -102.6(8) |
| O14              | Mo2  | O6   | Mo1              | -10.3(14) |
| O14              | Mo2  | O15  | Mo4 <sup>1</sup> | -52.7(8)  |
| O7               | Mo3  | O10  | Mo5              | 102.5(7)  |
| O7               | Mo2  | O6   | Mo1              | 55.3(7)   |
| O7               | Mo2  | O15  | Mo4 <sup>1</sup> | 11.9(14)  |
| O16              | Mo6  | O11  | Mo5              | -12.4(14) |
| O16              | Mo6  | O14  | Mo2              | -55.8(7)  |
| O16 <sup>1</sup> | Mo4  | O8   | Mo3              | 100.1(8)  |
| O12              | Mo6  | O11  | Mo5              | 52.9(8)   |
| O12              | Mo6  | O14  | Mo2              | 5.6(14)   |
| O12 <sup>1</sup> | Mo1  | O5   | Mo3              | -102.6(8) |
| O6               | Mo1  | O5   | Mo3              | 54.3(8)   |
| O6               | Mo2  | O15  | Mo4 <sup>1</sup> | 103.8(8)  |
| O21              | Mo5  | O13  | Mo1 <sup>1</sup> | 153.3(7)  |
| O21              | Mo5  | O9   | Mo4              | -154.3(7) |
| O8               | Mo3  | O7   | Mo2              | -17.0(13) |
| O8               | Mo3  | O10  | Mo5              | -54.2(7)  |
| O5               | Mo3  | O7   | Mo2              | 51.3(7)   |
| O5               | Mo3  | O10  | Mo5              | 11.2(13)  |
| O15 <sup>1</sup> | Mo4  | O8   | Mo3              | 5.0(15)   |
| O15              | Mo2  | O6   | Mo1              | -101.1(7) |
| O10              | Mo5  | O13  | Mo1 <sup>1</sup> | -6.9(13)  |
| O10              | Mo5  | O9   | Mo4              | -54.1(8)  |
| O10              | Mo3  | O7   | Mo2              | -104.3(7) |
| O9               | Mo5  | O13  | Mo1 <sup>1</sup> | -101.7(7) |
| O9               | Mo4  | O8   | Mo3              | -56.2(8)  |
| O17              | Mo1  | O5   | Mo3              | 154.5(7)  |
| C43              | P3   | C31  | C36              | 92.2(10)  |
| C43              | P3   | C31  | C32              | -78.9(9)  |
| C43              | P3   | C37  | C42              | -171.2(8) |
| C43              | P3   | C37  | C38              | 8.9(10)   |
| C43              | P3   | C25  | C26              | -164.9(8) |
| C43              | P3   | C25  | C30              | 23.1(10)  |
| C43              | C44  | C45  | C46              | 0.1(15)   |
| C43              | C48  | C47  | C46              | 3.6(17)   |
| C31              | P3   | C43  | C44              | -3.6(9)   |
| C31              | P3   | C43  | C48              | 174.1(8)  |
| C31              | P3   | C37  | C42              | 69.8(9)   |
| C31              | P3   | C37  | C38              | -110.1(9) |
| C31              | P3   | C25  | C26              | -45.5(9)  |
| C31              | P3   | C25  | C30              | 142.4(8)  |
| C31              | C36  | C35  | C34              | 1(2)      |
| C31              | C32  | C33  | C34              | 0.8(16)   |
| C44              | C43  | C48  | C47              | -2.1(16)  |
| C44              | C45  | C46  | C47              | 1.4(16)   |
| C37              | P3   | C43  | C44              | -124.3(8) |
| C37              | P3   | C43  | C48              | 53.5(10)  |
| C37              | P3   | C31  | C36              | -147.8(9) |
| C37              | P3   | C31  | C32              | 41.1(9)   |
| C37              | P3   | C25  | C26              | 75.2(9)   |
| C37              | P3   | C25  | C30              | -96.8(9)  |
| C37              | C42  | C41  | C40              | 1.3(19)   |
| C37              | C38  | C39  | C40              | 0(2)      |
| C26              | C27  | C28  | C29              | 0.2(17)   |

| Atom            | Atom | Atom | Atom             | Angle/°   |
|-----------------|------|------|------------------|-----------|
| C45             | C46  | C47  | C48              | -3.2(18)  |
| C19             | P2   | C7   | C8               | 139.7(9)  |
| C19             | P2   | C7   | C12              | -41.0(10) |
| C19             | P2   | C13  | C14              | -67.7(10) |
| C19             | P2   | C13  | C18              | 107.7(9)  |
| C19             | P2   | C1   | C6               | -54.6(10) |
| C19             | P2   | C1   | C2               | 131.1(9)  |
| C19             | C20  | C21  | C22              | 3(2)      |
| C25             | P3   | C43  | C44              | 117.0(8)  |
| C25             | P3   | C43  | C48              | -65.3(10) |
| C25             | P3   | C31  | C36              | -28.9(11) |
| C25             | P3   | C31  | C32              | 160.1(8)  |
| C25             | P3   | C37  | C42              | -50.5(9)  |
| C25             | P3   | C37  | C38              | 129.6(9)  |
| C25             | C26  | C27  | C28              | -0.2(16)  |
| C25             | C30  | C29  | C28              | -1.4(17)  |
| C27             | C26  | C25  | P3               | -173.1(8) |
| C27             | C26  | C25  | C30              | -0.6(15)  |
| C27             | C28  | C29  | C30              | 0.6(18)   |
| C7              | P2   | C19  | C24              | 138.1(9)  |
| C7              | P2   | C19  | C20              | -40.6(10) |
| C7              | P2   | C13  | C14              | 174.5(9)  |
| C7              | P2   | C13  | C18              | -10.1(11) |
| C7              | P2   | C1   | C6               | 62.7(10)  |
| C7              | P2   | C1   | C2               | -111.6(9) |
| C7              | C8   | C9   | C10              | 0.9(19)   |
| C36             | C31  | C32  | C33              | -1.6(15)  |
| N1              | C49  | C54  | C53              | 178.2(9)  |
| C13             | P2   | C19  | C24              | 18.4(10)  |
| C13             | P2   | C19  | C20              | -160.4(9) |
| C13             | P2   | C7   | C8               | -101.0(9) |
| C13             | P2   | C7   | C12              | 78.4(10)  |
| C13             | P2   | C1   | C6               | -176.4(9) |
| C13             | P2   | C1   | C2               | 9.3(11)   |
| C13             | C14  | C15  | C16              | 0(2)      |
| C13             | C18  | C17  | C16              | 2(2)      |
| C23             | C22  | C21  | C20              | -6(2)     |
| C32             | C31  | C36  | C35              | 0.7(18)   |
| C32             | C33  | C34  | C35              | 1.0(19)   |
| C1              | P2   | C19  | C24              | -103.8(9) |
| C1              | P2   | C19  | C20              | 77.4(10)  |
| C1              | P2   | C7   | C8               | 19.9(10)  |
| C1              | P2   | C7   | C12              | -160.8(9) |
| C1              | P2   | C13  | C14              | 54.9(10)  |
| C1              | P2   | C13  | C18              | -129.7(9) |
| C1              | C6   | C5   | C4               | 1(2)      |
| C1              | C2   | C3   | C4               | -5.2(19)  |
| C33             | C34  | C35  | C36              | -2(2)     |
| C8              | C7   | C12  | C11              | -1.5(18)  |
| C24             | C19  | C20  | C21              | 0.9(19)   |
| C24             | C23  | C22  | C21              | 5(2)      |
| C48             | C43  | C44  | C45              | 0.3(15)   |
| C6              | C1   | C2   | C3               | 4.9(16)   |
| C14             | C13  | C18  | C17              | -1.6(17)  |
| C14             | C15  | C16  | C17              | 1(2)      |
| C42             | C37  | C38  | C39              | 1.6(17)   |
| C42             | C41  | C40  | C39              | 0(2)      |
| C22             | C23  | C24  | C19              | -1.7(18)  |
| O4              | Mo6  | O11  | Mo5              | -38.0(8)  |
| O4              | Mo6  | O14  | Mo2              | 7.1(7)    |
| O4 <sup>1</sup> | Mo4  | O8   | Mo3              | 35.6(8)   |
| O4              | Mo2  | O6   | Mo1              | -35.3(8)  |
| O4              | Mo2  | O15  | Mo4 <sup>1</sup> | 8.3(7)    |

| Atom            | Atom | Atom | Atom             | Angle/°    |
|-----------------|------|------|------------------|------------|
| O4              | P1   | O2   | Mo5              | 63.4(9)    |
| O4 <sup>1</sup> | P1   | O2   | Mo5              | -116.6(9)  |
| O4              | P1   | O2   | Mo3              | -58.9(8)   |
| O4 <sup>1</sup> | P1   | O2   | Mo3              | 121.1(8)   |
| O4 <sup>1</sup> | P1   | O2   | Mo4              | 3.8(7)     |
| O4              | P1   | O2   | Mo4              | -176.2(7)  |
| O4              | P1   | O3   | Mo6              | -3.9(7)    |
| O4 <sup>1</sup> | P1   | O3   | Mo6              | 176.1(7)   |
| O4 <sup>1</sup> | P1   | O3   | Mo1 <sup>1</sup> | -60.9(9)   |
| O4              | P1   | O3   | Mo1 <sup>1</sup> | 119.1(9)   |
| O4 <sup>1</sup> | P1   | O3   | Mo5              | 57.9(9)    |
| O4              | P1   | O3   | Mo5              | -122.1(9)  |
| O4              | P1   | O1   | Mo1              | -126.2(10) |
| O4 <sup>1</sup> | P1   | O1   | Mo1              | 53.8(10)   |
| O4 <sup>1</sup> | P1   | O1   | Mo3              | -66.6(9)   |
| O4              | P1   | O1   | Mo3              | 113.4(9)   |
| O4 <sup>1</sup> | P1   | O1   | Mo2              | 176.3(7)   |
| O4              | P1   | O1   | Mo2              | -3.7(7)    |
| O4              | P1   | O1   | O3 <sup>1</sup>  | -123.2(8)  |
| O4 <sup>1</sup> | P1   | O1   | O3 <sup>1</sup>  | 56.8(8)    |
| C15             | C16  | C17  | C18              | -2(2)      |
| C5              | C4   | C3   | C2               | 3(2)       |
| C41             | C40  | C39  | C38              | -1(2)      |
| C20             | C19  | C24  | C23              | -1.4(17)   |
| C38             | C37  | C42  | C41              | -2.2(17)   |
| C2              | C1   | C6   | C5               | -2.8(18)   |
| C29             | C30  | C25  | P3               | 173.6(8)   |
| C29             | C30  | C25  | C26              | 1.3(15)    |
| C10             | C11  | C12  | C7               | -3(2)      |
| C18             | C13  | C14  | C15              | 0.6(17)    |
| C3              | C4   | C5   | C6               | -1(2)      |
| C11             | C10  | C9   | C8               | -5(2)      |
| C12             | C7   | C8   | C9               | 2.5(17)    |
| C9              | C10  | C11  | C12              | 6(2)       |
| C52             | C51  | C50  | C49              | 0.0        |
| C51             | C52  | C53  | C54              | 0.0        |
| C51             | C50  | C49  | N1               | -178.2(10) |
| C51             | C50  | C49  | C54              | 0.0        |
| C50             | C49  | C54  | C53              | 0.0        |
| C49             | N1   | C56  | O23              | 177.5(13)  |
| C49             | C54  | C53  | C52              | 0.0        |
| C53             | C52  | C51  | C50              | 0.0        |
| C56             | N1   | C49  | C50              | -5.1(17)   |
| C56             | N1   | C49  | C54              | 176.7(12)  |
| C55             | N1   | C49  | C50              | 175.8(16)  |
| C55             | N1   | C49  | C54              | -2.5(19)   |
| C55             | N1   | C56  | O23              | -3(3)      |
| O2              | Mo5  | O13  | Mo1 <sup>1</sup> | -36.1(8)   |
| O2              | Mo5  | O9   | Mo4              | 7.9(7)     |
| O2              | Mo3  | O7   | Mo2              | -40.6(7)   |
| O2              | Mo3  | O10  | Mo5              | 8.0(6)     |
| O2              | Mo4  | O8   | Mo3              | 4.7(7)     |
| O2              | P1   | O4   | Mo6              | -56.5(9)   |
| O2 <sup>1</sup> | P1   | O4   | Mo6              | 123.5(9)   |
| O2              | P1   | O4   | Mo4 <sup>1</sup> | -176.3(7)  |
| O2 <sup>1</sup> | P1   | O4   | Mo4 <sup>1</sup> | 3.7(7)     |
| O2 <sup>1</sup> | P1   | O4   | Mo2              | -113.5(9)  |
| O2              | P1   | O4   | Mo2              | 66.5(9)    |
| O2              | P1   | O3   | Mo6              | 114.4(9)   |
| O2 <sup>1</sup> | P1   | O3   | Mo6              | -65.6(9)   |
| O2 <sup>1</sup> | P1   | O3   | Mo1 <sup>1</sup> | 57.4(9)    |
| O2              | P1   | O3   | Mo1 <sup>1</sup> | -122.6(9)  |
| O2              | P1   | O3   | Mo5              | -3.8(6)    |



| Atom            | Atom | Atom | Atom             | Angle/°    |
|-----------------|------|------|------------------|------------|
| O2 <sup>1</sup> | P1   | O3   | Mo5              | 176.2(6)   |
| O2              | P1   | O1   | Mo1              | 117.1(9)   |
| O2 <sup>1</sup> | P1   | O1   | Mo1              | -62.9(9)   |
| O2              | P1   | O1   | Mo3              | -3.2(6)    |
| O2 <sup>1</sup> | P1   | O1   | Mo3              | 176.8(6)   |
| O2              | P1   | O1   | Mo2              | -120.3(9)  |
| O2 <sup>1</sup> | P1   | O1   | Mo2              | 59.7(9)    |
| O2              | P1   | O1   | O3 <sup>1</sup>  | 120.2(7)   |
| O2 <sup>1</sup> | P1   | O1   | O3 <sup>1</sup>  | -59.8(7)   |
| O3              | Mo6  | O11  | Mo5              | -8.3(7)    |
| O3              | Mo6  | O14  | Mo2              | 34.7(8)    |
| O3 <sup>1</sup> | Mo1  | O5   | Mo3              | -37.8(8)   |
| O3              | Mo5  | O13  | Mo1 <sup>1</sup> | -7.2(7)    |
| O3              | Mo5  | O9   | Mo4              | 38.1(8)    |
| O3 <sup>1</sup> | P1   | O4   | Mo6              | -176.0(7)  |
| O3              | P1   | O4   | Mo6              | 4.0(7)     |
| O3              | P1   | O4   | Mo4 <sup>1</sup> | -115.8(9)  |
| O3 <sup>1</sup> | P1   | O4   | Mo4 <sup>1</sup> | 64.2(9)    |
| O3 <sup>1</sup> | P1   | O4   | Mo2              | -53.0(9)   |
| O3              | P1   | O4   | Mo2              | 127.0(9)   |
| O3 <sup>1</sup> | P1   | O2   | Mo5              | -175.9(7)  |
| O3              | P1   | O2   | Mo5              | 4.1(7)     |
| O3              | P1   | O2   | Mo3              | -118.2(8)  |
| O3 <sup>1</sup> | P1   | O2   | Mo3              | 61.8(8)    |
| O3 <sup>1</sup> | P1   | O2   | Mo4              | -55.5(9)   |
| O3              | P1   | O2   | Mo4              | 124.5(9)   |
| O3 <sup>1</sup> | P1   | O1   | Mo1              | -3.0(7)    |
| O3              | P1   | O1   | Mo1              | 177.0(7)   |
| O3 <sup>1</sup> | P1   | O1   | Mo3              | -123.4(9)  |
| O3              | P1   | O1   | Mo3              | 56.6(9)    |
| O3              | P1   | O1   | Mo2              | -60.5(9)   |
| O3 <sup>1</sup> | P1   | O1   | Mo2              | 119.5(9)   |
| O3              | P1   | O1   | O3 <sup>1</sup>  | 180.002(3) |
| O24             | C64  | N2   | C57              | 175(4)     |
| O24             | C64  | N2   | C63              | 1(6)       |
| C58             | C57  | C62  | C61              | 0.0        |
| C58             | C57  | N2   | C63              | -156(3)    |
| C58             | C57  | N2   | C64              | 32(4)      |
| C57             | C58  | C59  | C60              | 0.0        |
| C57             | C62  | C61  | C60              | 0.0        |
| C62             | C57  | N2   | C63              | 24(4)      |
| C62             | C57  | N2   | C64              | -148(3)    |
| C62             | C61  | C60  | C59              | 0.0        |
| C61             | C60  | C59  | C58              | 0.0        |
| C59             | C58  | C57  | C62              | 0.0        |
| C59             | C58  | C57  | N2               | -180(3)    |
| O1              | Mo1  | O5   | Mo3              | -8.3(7)    |
| O1              | Mo3  | O7   | Mo2              | -8.9(6)    |
| O1              | Mo3  | O10  | Mo5              | 37.4(8)    |
| O1              | Mo2  | O6   | Mo1              | -7.0(6)    |
| O1              | Mo2  | O15  | Mo4 <sup>1</sup> | 39.5(8)    |
| O1              | P1   | O4   | Mo6              | -119.3(9)  |
| O1 <sup>1</sup> | P1   | O4   | Mo6              | 60.7(9)    |
| O1              | P1   | O4   | Mo4 <sup>1</sup> | 121.0(9)   |
| O1 <sup>1</sup> | P1   | O4   | Mo4 <sup>1</sup> | -59.0(9)   |
| O1              | P1   | O4   | Mo2              | 3.7(7)     |
| O1 <sup>1</sup> | P1   | O4   | Mo2              | -176.3(7)  |
| O1              | P1   | O2   | Mo5              | 125.5(9)   |
| O1 <sup>1</sup> | P1   | O2   | Mo5              | -54.5(9)   |
| O1 <sup>1</sup> | P1   | O2   | Mo3              | -176.8(6)  |
| O1              | P1   | O2   | Mo3              | 3.2(6)     |
| O1              | P1   | O2   | Mo4              | -114.1(8)  |
| O1 <sup>1</sup> | P1   | O2   | Mo4              | 65.9(8)    |

| Atom            | Atom | Atom | Atom             | Angle/°    |
|-----------------|------|------|------------------|------------|
| O1 <sup>1</sup> | P1   | O3   | Mo6              | -126.0(10) |
| O1              | P1   | O3   | Mo6              | 54.0(10)   |
| O1 <sup>1</sup> | P1   | O3   | Mo1 <sup>1</sup> | -3.0(7)    |
| O1              | P1   | O3   | Mo1 <sup>1</sup> | 177.0(7)   |
| O1 <sup>1</sup> | P1   | O3   | Mo5              | 115.8(9)   |
| O1              | P1   | O3   | Mo5              | -64.2(9)   |
| N2              | C57  | C62  | C61              | 180(3)     |

----

<sup>1</sup>-x,2-y,1-z

**Table 6:** Hydrogen Fractional Atomic Coordinates ( $\times 10^4$ ) and Equivalent Isotropic Displacement Parameters ( $\text{\AA}^2 \times 10^3$ ) for **compound 1**.  $U_{eq}$  is defined as 1/3 of the trace of the orthogonalised  $U_{ij}$ .

| Atom | x        | y        | z        | $U_{eq}$ |
|------|----------|----------|----------|----------|
| H44  | 8334.85  | 7265.73  | 3650.26  | 51       |
| H26  | 4625.38  | 7345.22  | 4554.01  | 51       |
| H45  | 10158.53 | 6490.97  | 3169.84  | 57       |
| H30  | 7187.97  | 4883.54  | 4006.91  | 56       |
| H27  | 3796.45  | 6538.73  | 4172.88  | 62       |
| H36  | 6119.69  | 7782.01  | 3276.27  | 73       |
| H23  | 2116.23  | 7723.17  | 1997.19  | 72       |
| H32  | 6451.31  | 8586.23  | 5357.28  | 55       |
| H28  | 4676.08  | 4918.74  | 3696.95  | 65       |
| H33  | 6392.68  | 10052.92 | 4783.28  | 71       |
| H34  | 6204.73  | 10380.18 | 3478.42  | 84       |
| H8   | 1704.54  | 3734.54  | -175.5   | 63       |
| H24  | 1129.32  | 7254.13  | 1475.05  | 63       |
| H48  | 7993.76  | 4957.6   | 4957.02  | 60       |
| H6   | 2164.04  | 3808.65  | 1494.3   | 77       |
| H14  | -498.63  | 7020.23  | 1743.4   | 75       |
| H46  | 10886.09 | 4939.71  | 3592.75  | 66       |
| H4   | -307.98  | 3096.87  | 2856.1   | 106      |
| H42  | 4496.92  | 7414.04  | 6009.07  | 65       |
| H22  | 3680.51  | 6592.07  | 2016.97  | 81       |
| H15  | -1692.48 | 8419.53  | 1455.84  | 92       |
| H5   | 1460.16  | 2797.53  | 2404.6   | 96       |
| H41  | 3714.72  | 7419.21  | 7504.81  | 78       |
| H20  | 3406.02  | 4576.06  | 795.47   | 78       |
| H47  | 9803.33  | 4156.43  | 4419.65  | 69       |
| H38  | 7346.63  | 6344.74  | 6131.4   | 69       |
| H2   | -687.79  | 5444.32  | 1464.81  | 67       |
| H29  | 6349.71  | 4110.86  | 3602.84  | 65       |
| H40  | 4754.14  | 6899.8   | 8305.05  | 79       |
| H10  | 4308.79  | 3222.83  | -2339.9  | 94       |
| H18  | 1110.49  | 6360.13  | -847.57  | 71       |
| H3   | -1392.76 | 4451.92  | 2462.51  | 92       |
| H11  | 4332.33  | 4702.7   | -2069.22 | 95       |
| H39  | 6531.58  | 6382.81  | 7630.05  | 88       |
| H16  | -1493.6  | 8782.98  | 62.89    | 95       |
| H12  | 3149.28  | 5623.33  | -769.27  | 77       |
| H9   | 2933.6   | 2811.95  | -1465.45 | 81       |
| H35  | 6022.77  | 9269.27  | 2745.75  | 106      |
| H52  | 5575.11  | 11181.19 | 1727.96  | 132      |
| H51  | 6973.12  | 10226.82 | 510.16   | 171      |
| H50  | 6830.28  | 8979.16  | -102.42  | 141      |
| H54  | 3891.41  | 9640.22  | 1720.59  | 106      |
| H53  | 4034.23  | 10887.89 | 2333.18  | 128      |
| H17  | -137.55  | 7748.8   | -1098.11 | 99       |
| H56  | 6538.53  | 8018.05  | -582.78  | 101      |
| H21  | 4408.69  | 5066.88  | 1307.06  | 125      |
| H55A | 4104.59  | 8227.11  | 1462.65  | 277      |
| H55B | 4418.28  | 7574.78  | 632.43   | 277      |

| Atom | x        | y        | z        | $U_{eq}$ |
|------|----------|----------|----------|----------|
| H55C | 3721.67  | 8688.34  | 713.75   | 277      |
| H58  | 385.91   | 9663.13  | 11033.1  | 106      |
| H62  | -292.42  | 10321.58 | 8891.18  | 90       |
| H61  | -1952    | 11437.57 | 9741.44  | 118      |
| H60  | -2442.65 | 11666.36 | 11237.54 | 121      |
| H59  | -1273.71 | 10779.15 | 11883.38 | 108      |
| H63A | 1520.89  | 8897.06  | 8142.24  | 153      |
| H63B | 2430.46  | 9038.13  | 8296.12  | 153      |
| H63C | 1433.55  | 9946.49  | 8317.94  | 153      |
| H64  | 1358.79  | 8365.57  | 10239.03 | 97       |

**Table 7:** Atomic Occupancies for all atoms that are not fully occupied in **compound1**.

| Atom | Occupancy |
|------|-----------|
| O4   | 0.5       |
| O2   | 0.5       |
| O3   | 0.5       |
| O24  | 0.5       |
| C58  | 0.5       |
| H58  | 0.5       |
| C57  | 0.5       |
| C62  | 0.5       |
| H62  | 0.5       |
| C61  | 0.5       |
| H61  | 0.5       |
| C60  | 0.5       |
| H60  | 0.5       |
| C59  | 0.5       |
| H59  | 0.5       |
| O1   | 0.5       |
| C63  | 0.5       |
| H63A | 0.5       |
| H63B | 0.5       |
| H63C | 0.5       |
| C64  | 0.5       |
| H64  | 0.5       |
| N2   | 0.5       |

## Citations

O.V. Dolomanov and L.J. Bourhis and R.J. Gildea and J.A.K. Howard and H. Puschmann, Olex2: A complete structure solution, refinement and analysis program, *J. Appl. Cryst.*, (2009), **42**, 339-341.

SADABS, Bruker axs, Madison, WI (?).

SAINT - Software for the Integration of CCD Detector System Bruker Analytical X-ray Systems, Bruker axs, Madison, WI (?).

Sheldrick, G.M., Crystal structure refinement with ShelXL, *Acta Cryst.*, (2015), **C71**, 3-8.

Sheldrick, G.M., ShelXT-Integrated space-group and crystal-structure determination, *Acta Cryst.*, (2015), **A71**, 3-8.

# Compound 2

## Crystal Data and Experimental

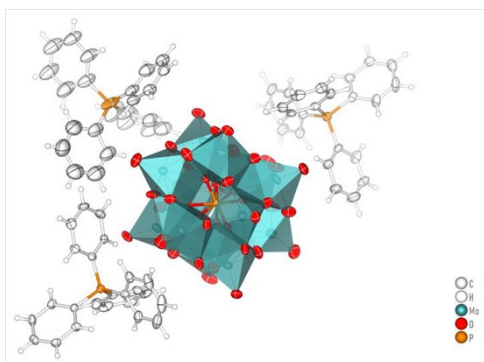

**Experimental.** Single clear yellow plate-shaped crystals of **comp-2\_sg** recrystallised from a mixture of water and methanol by slow evaporation. A suitable crystal with dimensions  $0.20 \times 0.18 \times 0.17 \text{ mm}^3$  was selected and mounted on a Bruker APEX-II CCD diffractometer. The crystal was kept at a steady  $T = 100(2) \text{ K}$  during data collection. The structure was solved with the Superflip (Palatinus & Chapuis, 2007; Palatinus & van der Lee, 2008; Palatinus et al., 2012) solution program using  $\lambda$  and by using Olex2 1.5-dev (Dolomanov et al., 2009) as the graphical interface. The model was refined with ShelXL 2018/3 (Sheldrick, 2015) using full matrix least squares minimisation on  $F^2$ .

**Crystal Data.**  $\text{C}_{86}\text{H}_{75.75}\text{Mo}_{12}\text{N}_{1.75}\text{O}_{41.75}\text{P}_4$ ,  $M_r = 3076.89$ , monoclinic,  $P2_1/n$  (No. 14),  $a = 14.219(3) \text{ \AA}$ ,  $b = 25.074(6) \text{ \AA}$ ,  $c = 27.423(7) \text{ \AA}$ ,  $\beta = 97.437(11)^\circ$ ,  $\alpha = \gamma = 90^\circ$ ,  $V = 9695(4) \text{ \AA}^3$ ,  $T = 100(2) \text{ K}$ ,  $Z = 4$ ,  $Z' = 1$ ,  $\mu(\text{MoK}\alpha) = 1.653$ , 317477 reflections measured, 17041 unique ( $R_{\text{int}} = 0.1447$ ) which were used in all calculations. The final  $wR_2$  was 0.1104 (all data) and  $R_1$  was 0.0530 ( $I \geq 2\sigma(I)$ ).

## $R_1 = 5.30\%$

| Compound                              | comp-2_sg                                                                              |
|---------------------------------------|----------------------------------------------------------------------------------------|
| Formula                               | $\text{C}_{86}\text{H}_{75.75}\text{Mo}_{12}\text{N}_{1.75}\text{O}_{41.75}\text{P}_4$ |
| $D_{\text{calc.}} / \text{g cm}^{-3}$ | 2.108                                                                                  |
| $\mu / \text{mm}^{-1}$                | 1.653                                                                                  |
| Formula Weight                        | 3076.89                                                                                |
| Colour                                | clear yellow                                                                           |
| Shape                                 | plate-shaped                                                                           |
| Size/mm <sup>3</sup>                  | 0.20.0.18.0.17                                                                         |
| $T/\text{K}$                          | 100(2)                                                                                 |
| Crystal System                        | monoclinic                                                                             |
| Space Group                           | $P2_1/n$                                                                               |
| $a/\text{Å}$                          | 14.219(3)                                                                              |
| $b/\text{Å}$                          | 25.074(6)                                                                              |
| $c/\text{Å}$                          | 27.423(7)                                                                              |
| $\alpha/^\circ$                       | 90                                                                                     |
| $\beta/^\circ$                        | 97.437(11)                                                                             |
| $\gamma/^\circ$                       | 90                                                                                     |
| $V/\text{Å}^3$                        | 9695(4)                                                                                |
| $Z$                                   | 4                                                                                      |
| $Z'$                                  | 1                                                                                      |
| Wavelength/Å                          | 0.71073                                                                                |
| Radiation type                        | MoK $\alpha$                                                                           |
| $\theta_{\text{min}}/^\circ$          | 2.105                                                                                  |
| $\theta_{\text{max}}/^\circ$          | 24.999                                                                                 |
| Measured Refl's.                      | 317477                                                                                 |
| Indep't Refl's                        | 17041                                                                                  |
| Refl's $I \geq 2\sigma(I)$            | 12616                                                                                  |
| $R_{\text{int}}$                      | 0.1447                                                                                 |
| Parameters                            | 1190                                                                                   |
| Restraints                            | 360                                                                                    |
| Largest Peak                          | 1.107                                                                                  |
| Deepest Hole                          | -1.129                                                                                 |
| GooF                                  | 1.034                                                                                  |
| $wR_2$ (all data)                     | 0.1104                                                                                 |
| $wR_2$                                | 0.0996                                                                                 |
| $R_1$ (all data)                      | 0.0795                                                                                 |
| $R_1$                                 | 0.0530                                                                                 |

## Structure Quality Indicators

|              |                                                |       |               |      |                                 |        |                   |       |
|--------------|------------------------------------------------|-------|---------------|------|---------------------------------|--------|-------------------|-------|
| Reflections: | $d \text{ min (Mo)}$<br>$2\theta = 50.0^\circ$ | 0.84  | $I/\sigma(I)$ | 19.0 | $R_{\text{int}}$<br>$n = 18,91$ | 14.47% | Full $50.0^\circ$ | 99.9  |
| Refinement:  | Shift                                          | 0.002 | Max Peak      | 1.1  | Min Peak                        | -1.1   | Goof              | 1.034 |

A clear yellow plate-shaped crystal with dimensions  $0.20 \times 0.18 \times 0.17 \text{ mm}^3$  was mounted. Data were collected using a Bruker APEX-II CCD diffractometer equipped with an Oxford Cryosystems low-temperature device operating at  $T = 100(2) \text{ K}$ .

Data were measured using  $\phi$  and  $\omega$  scans with  $\text{MoK}_\alpha$  radiation. The maximum resolution that was achieved was  $\Theta = 24.999^\circ$  ( $0.84 \text{ \AA}$ ).

The unit cell was refined using SAINT v8.37A (Bruker, 2015) on 9634 reflections, 3% of the observed reflections.

Data reduction, scaling and absorption corrections were performed using SAINT v8.37A (Bruker, 2015). The final completeness is 99.90 % out to  $24.999^\circ$  in  $\Theta$ . No absorption correction was performed. The absorption coefficient  $\mu$  of this material is  $1.653 \text{ mm}^{-1}$  at this wavelength ( $\lambda = 0.71073 \text{ \AA}$ ) and the minimum and maximum transmissions are 0.064 and 0.096.

The structure was solved and the space group  $P2_1/n$  (# 14) determined by the Superflip (Palatinus & Chapuis, 2007; Palatinus & van der Lee, 2008; Palatinus et al., 2012) structure solution program using  $\phi$  and refined by full matrix least squares minimisation on  $F^2$  using version 2018/3 of ShelXL 2018/3 (Sheldrick, 2015). All non-hydrogen atoms were refined anisotropically. Hydrogen atom positions were calculated geometrically and refined using the riding model. Hydrogen atom positions were calculated geometrically and refined using the riding model.

\_exptl\_absorpt\_process\_details: SADABS-2008/1 (Bruker, 2008) was used for absorption correction.  $wR_2(\text{int})$  was 0.1105 before and 0.0997 after correction. The Ratio of minimum to maximum transmission is 0.6632. The  $\lambda/2$  correction factor is 0.0015.

\_smtbx\_masks\_special\_details: A solvent mask was calculated and 506 electrons were found in a volume of  $1558 \text{ \AA}^3$  in 2 voids per unit cell. This is consistent with the presence of  $1.75[\text{C}_8\text{H}_9\text{NO}]$  per Formula Unit ( $7^* \text{N-Methyl Formanilide}$  per unit cell) which account for 504 electrons per unit cell.

## Data Plots: Diffraction Data

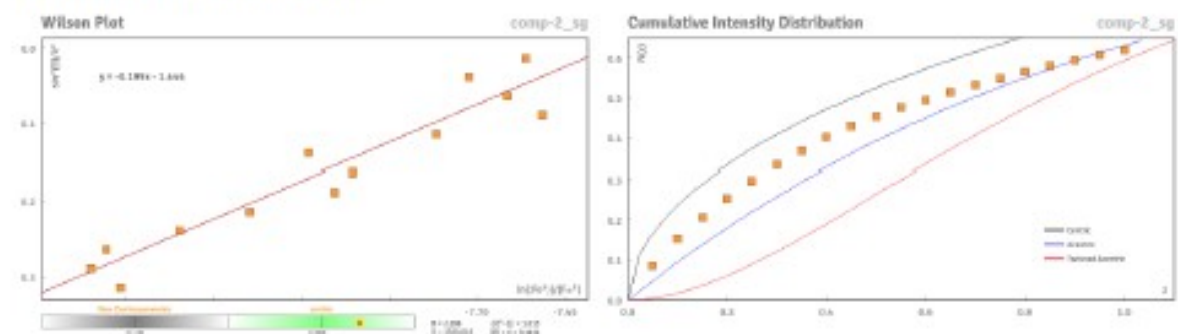

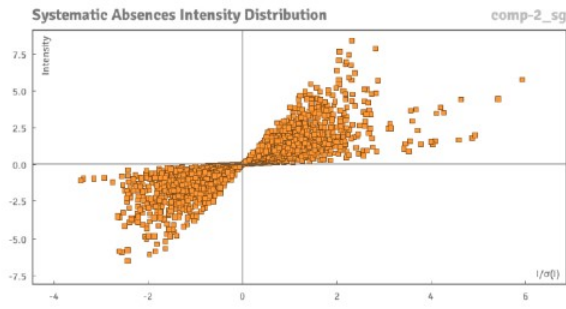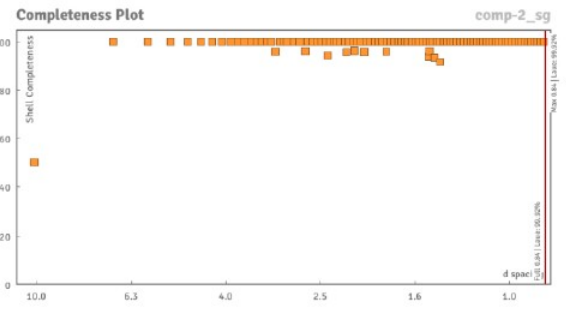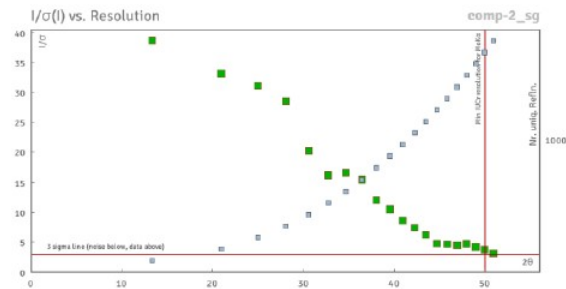

## Data Plots: Refinement and Data

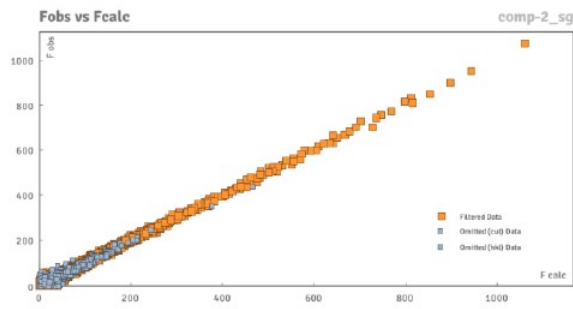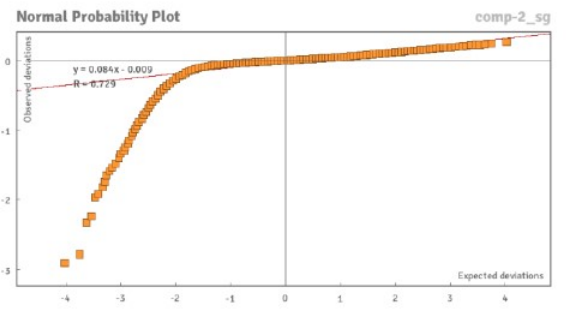

**Table 8:** Bond Lengths in Å for **compound2**.

| Atom | Atom | Length/Å | Atom | Atom | Length/Å |
|------|------|----------|------|------|----------|
| Mo5  | O9   | 1.839(5) | Mo6  | O9   | 2.008(5) |
| Mo5  | O12  | 1.807(5) | Mo6  | O18  | 1.993(5) |
| Mo5  | O11  | 2.030(6) | Mo6  | O10  | 1.838(6) |
| Mo5  | O14  | 2.011(5) | Mo6  | O1   | 2.458(6) |
| Mo5  | O1   | 2.437(5) | Mo6  | O4   | 2.55(2)  |
| Mo5  | O37  | 1.657(5) | Mo2  | O16  | 1.843(5) |
| Mo5  | O2   | 2.51(2)  | Mo2  | O24  | 2.006(5) |
| Mo1  | O33  | 1.671(6) | Mo2  | O17  | 2.018(6) |
| Mo1  | O13  | 1.825(5) | Mo2  | O3   | 2.456(6) |
| Mo1  | O12  | 1.995(5) | Mo2  | O26  | 1.798(6) |
| Mo1  | O15  | 2.008(5) | Mo2  | O34  | 1.657(5) |
| Mo1  | O17  | 1.823(5) | Mo2  | O6   | 2.38(3)  |
| Mo1  | O3   | 2.429(6) | Mo10 | O42  | 1.671(5) |
| Mo1  | O2   | 2.42(2)  | Mo10 | O20  | 1.988(5) |
| Mo3  | O16  | 1.997(5) | Mo10 | O21  | 1.839(6) |
| Mo3  | O15  | 1.844(6) | Mo10 | O23  | 2.009(6) |
| Mo3  | O19  | 1.995(6) | Mo10 | O19  | 1.798(6) |
| Mo3  | O3   | 2.480(6) | Mo10 | O5   | 2.441(6) |
| Mo3  | O18  | 1.812(5) | Mo10 | O4   | 2.41(2)  |
| Mo3  | O35  | 1.666(5) | Mo9  | O41  | 1.671(6) |
| Mo3  | O4   | 2.49(3)  | Mo9  | O30  | 1.997(5) |
| Mo6  | O38  | 1.673(5) | Mo9  | O29  | 1.834(6) |
| Mo6  | O20  | 1.825(5) | Mo9  | O28  | 2.016(6) |

| Atom | Atom | Length/Å | Atom | Atom | Length/Å |
|------|------|----------|------|------|----------|
| Mo9  | O32  | 1.801(6) | Mo11 | O26  | 1.990(6) |
| Mo9  | O7   | 2.446(5) | Mo11 | O22  | 1.835(6) |
| Mo9  | O8   | 2.55(3)  | Mo11 | O25  | 1.794(6) |
| Mo4  | O36  | 1.649(5) | Mo11 | O5   | 2.464(6) |
| Mo4  | O11  | 1.840(6) | Mo11 | O6   | 2.47(3)  |
| Mo4  | O30  | 1.819(6) | Mo12 | O23  | 1.850(6) |
| Mo4  | O31  | 1.989(5) | Mo12 | O22  | 2.002(6) |
| Mo4  | O10  | 2.038(6) | Mo12 | O31  | 1.818(6) |
| Mo4  | O1   | 2.434(5) | Mo12 | O44  | 1.678(6) |
| Mo4  | O8   | 2.57(3)  | Mo12 | O32  | 2.011(6) |
| Mo8  | O40  | 1.677(5) | Mo12 | O5   | 2.441(6) |
| Mo8  | O13  | 1.978(5) | Mo12 | O8   | 2.49(3)  |
| Mo8  | O14  | 1.807(5) | Mo7  | O24  | 1.803(6) |
| Mo8  | O27  | 2.028(6) | Mo7  | O29  | 2.005(6) |
| Mo8  | O28  | 1.843(6) | Mo7  | O27  | 1.829(6) |
| Mo8  | O7   | 2.436(6) | Mo7  | O39  | 1.669(5) |
| Mo8  | O2   | 2.58(2)  | Mo7  | O25  | 2.010(6) |
| Mo11 | O43  | 1.677(5) | Mo7  | O7   | 2.445(6) |
| Mo11 | O21  | 2.002(6) | Mo7  | O6   | 2.52(3)  |



**Table 9:** Bond Angles in ° for **compound 2**.

| Atom | Atom | Atom | Angle/°  | Atom | Atom | Atom | Angle/°  |
|------|------|------|----------|------|------|------|----------|
| 09   | Mo5  | O11  | 86.9(2)  | 017  | Mo1  | O2   | 103.5(6) |
| 09   | Mo5  | O14  | 154.7(2) | 016  | Mo3  | O3   | 69.0(2)  |
| 09   | Mo5  | O1   | 72.7(2)  | 016  | Mo3  | O4   | 95.1(6)  |
| 09   | Mo5  | O2   | 103.3(6) | 015  | Mo3  | O16  | 86.7(2)  |
| 012  | Mo5  | O9   | 97.9(2)  | 015  | Mo3  | O19  | 152.9(2) |
| 012  | Mo5  | O11  | 155.1(3) | 015  | Mo3  | O3   | 71.2(2)  |
| 012  | Mo5  | O14  | 86.0(2)  | 015  | Mo3  | O4   | 105.0(6) |
| 012  | Mo5  | O1   | 88.5(2)  | 019  | Mo3  | O16  | 79.1(2)  |
| 012  | Mo5  | O2   | 55.7(6)  | 019  | Mo3  | O3   | 82.1(2)  |
| 011  | Mo5  | O1   | 69.5(2)  | 019  | Mo3  | O4   | 54.1(6)  |
| 011  | Mo5  | O2   | 99.4(6)  | 018  | Mo3  | O16  | 154.0(3) |
| 014  | Mo5  | O11  | 79.8(2)  | 018  | Mo3  | O15  | 97.6(3)  |
| 014  | Mo5  | O1   | 82.5(2)  | 018  | Mo3  | O19  | 86.0(2)  |
| 014  | Mo5  | O2   | 58.5(6)  | 018  | Mo3  | O3   | 88.0(2)  |
| 037  | Mo5  | O9   | 102.5(3) | 018  | Mo3  | O4   | 59.0(6)  |
| 037  | Mo5  | O12  | 104.4(3) | 035  | Mo3  | O16  | 99.1(2)  |
| 037  | Mo5  | O11  | 98.4(3)  | 035  | Mo3  | O15  | 101.9(3) |
| 037  | Mo5  | O14  | 100.7(3) | 035  | Mo3  | O19  | 103.1(3) |
| 037  | Mo5  | O1   | 166.9(2) | 035  | Mo3  | O3   | 166.2(2) |
| 037  | Mo5  | O2   | 149.3(6) | 035  | Mo3  | O18  | 105.0(3) |
| 033  | Mo1  | O13  | 103.6(3) | 035  | Mo3  | O4   | 150.1(6) |
| 033  | Mo1  | O12  | 101.9(3) | 038  | Mo6  | O20  | 104.1(3) |
| 033  | Mo1  | O15  | 99.7(3)  | 038  | Mo6  | O9   | 99.1(2)  |
| 033  | Mo1  | O17  | 102.5(3) | 038  | Mo6  | O18  | 102.0(3) |
| 033  | Mo1  | O3   | 168.3(3) | 038  | Mo6  | O10  | 101.5(3) |
| 033  | Mo1  | O2   | 150.3(6) | 038  | Mo6  | O1   | 166.9(2) |
| 013  | Mo1  | O12  | 85.9(2)  | 038  | Mo6  | O4   | 148.6(6) |
| 013  | Mo1  | O15  | 154.8(3) | 020  | Mo6  | O9   | 155.1(2) |
| 013  | Mo1  | O3   | 87.5(2)  | 020  | Mo6  | O18  | 85.9(2)  |
| 013  | Mo1  | O2   | 59.2(6)  | 020  | Mo6  | O10  | 97.4(3)  |
| 012  | Mo1  | O15  | 79.9(2)  | 020  | Mo6  | O1   | 88.1(2)  |
| 012  | Mo1  | O3   | 82.3(2)  | 020  | Mo6  | O4   | 56.3(6)  |
| 012  | Mo1  | O2   | 56.0(6)  | 09   | Mo6  | O1   | 69.7(2)  |
| 015  | Mo1  | O3   | 70.1(2)  | 09   | Mo6  | O4   | 98.9(6)  |
| 015  | Mo1  | O2   | 95.6(6)  | 018  | Mo6  | O9   | 80.5(2)  |
| 017  | Mo1  | O13  | 96.9(2)  | 018  | Mo6  | O1   | 83.3(2)  |
| 017  | Mo1  | O12  | 154.0(3) | 018  | Mo6  | O4   | 56.3(6)  |
| 017  | Mo1  | O15  | 87.3(2)  | 010  | Mo6  | O9   | 86.6(2)  |
| 017  | Mo1  | O3   | 72.0(2)  | 010  | Mo6  | O18  | 154.7(3) |

| Atom | Atom | Atom | Angle/°  | Atom | Atom | Atom | Angle/°  |
|------|------|------|----------|------|------|------|----------|
| 010  | Mo6  | 01   | 71.8(2)  | 036  | Mo4  | 030  | 104.3(3) |
| 010  | Mo6  | 04   | 105.1(6) | 036  | Mo4  | 031  | 101.4(3) |
| 016  | Mo2  | 024  | 153.4(2) | 036  | Mo4  | 010  | 97.7(3)  |
| 016  | Mo2  | 017  | 86.9(2)  | 036  | Mo4  | 01   | 166.0(2) |
| 016  | Mo2  | 03   | 71.7(2)  | 036  | Mo4  | 08   | 150.3(6) |
| 016  | Mo2  | 06   | 103.9(7) | 011  | Mo4  | 031  | 154.2(3) |
| 024  | Mo2  | 017  | 79.5(2)  | 011  | Mo4  | 010  | 86.0(2)  |
| 024  | Mo2  | 03   | 82.0(2)  | 011  | Mo4  | 01   | 72.3(2)  |
| 024  | Mo2  | 06   | 56.1(7)  | 011  | Mo4  | 08   | 104.9(6) |
| 017  | Mo2  | 03   | 68.6(2)  | 030  | Mo4  | 011  | 98.1(2)  |
| 017  | Mo2  | 06   | 97.3(7)  | 030  | Mo4  | 031  | 86.5(2)  |
| 026  | Mo2  | 016  | 97.8(3)  | 030  | Mo4  | 010  | 156.1(2) |
| 026  | Mo2  | 024  | 85.4(2)  | 030  | Mo4  | 01   | 89.3(2)  |
| 026  | Mo2  | 017  | 154.0(3) | 030  | Mo4  | 08   | 59.7(6)  |
| 026  | Mo2  | 03   | 88.5(2)  | 031  | Mo4  | 010  | 80.2(2)  |
| 026  | Mo2  | 06   | 56.7(7)  | 031  | Mo4  | 01   | 82.4(2)  |
| 034  | Mo2  | 016  | 101.9(3) | 031  | Mo4  | 08   | 55.7(6)  |
| 034  | Mo2  | 024  | 102.7(3) | 010  | Mo4  | 01   | 69.4(2)  |
| 034  | Mo2  | 017  | 98.9(3)  | 010  | Mo4  | 08   | 96.5(6)  |
| 034  | Mo2  | 03   | 165.9(3) | 040  | Mo8  | 013  | 100.9(3) |
| 034  | Mo2  | 026  | 105.0(3) | 040  | Mo8  | 014  | 104.0(3) |
| 034  | Mo2  | 06   | 150.1(7) | 040  | Mo8  | 027  | 98.3(3)  |
| 042  | Mo10 | 020  | 101.1(3) | 040  | Mo8  | 028  | 102.7(3) |
| 042  | Mo10 | 021  | 102.5(3) | 040  | Mo8  | 07   | 167.3(2) |
| 042  | Mo10 | 023  | 98.5(3)  | 040  | Mo8  | 02   | 147.8(6) |
| 042  | Mo10 | 019  | 104.2(3) | 013  | Mo8  | 027  | 80.2(2)  |
| 042  | Mo10 | 05   | 166.7(3) | 013  | Mo8  | 07   | 82.7(2)  |
| 042  | Mo10 | 04   | 149.9(6) | 013  | Mo8  | 02   | 54.7(6)  |
| 020  | Mo10 | 023  | 79.7(2)  | 014  | Mo8  | 013  | 86.4(2)  |
| 020  | Mo10 | 05   | 82.8(2)  | 014  | Mo8  | 027  | 155.8(3) |
| 020  | Mo10 | 04   | 57.8(6)  | 014  | Mo8  | 028  | 97.7(3)  |
| 021  | Mo10 | 020  | 154.1(3) | 014  | Mo8  | 07   | 88.3(2)  |
| 021  | Mo10 | 023  | 86.6(2)  | 014  | Mo8  | 02   | 58.5(5)  |
| 021  | Mo10 | 05   | 71.8(2)  | 027  | Mo8  | 07   | 70.1(2)  |
| 021  | Mo10 | 04   | 103.3(6) | 027  | Mo8  | 02   | 97.4(5)  |
| 023  | Mo10 | 05   | 69.5(2)  | 028  | Mo8  | 013  | 154.3(3) |
| 023  | Mo10 | 04   | 98.2(6)  | 028  | Mo8  | 027  | 86.3(2)  |
| 019  | Mo10 | 020  | 86.7(2)  | 028  | Mo8  | 07   | 72.1(2)  |
| 019  | Mo10 | 021  | 97.6(3)  | 028  | Mo8  | 02   | 106.2(6) |
| 019  | Mo10 | 023  | 155.4(3) | 043  | Mo11 | 021  | 99.3(3)  |
| 019  | Mo10 | 05   | 88.6(2)  | 043  | Mo11 | 026  | 101.7(3) |
| 019  | Mo10 | 04   | 57.2(6)  | 043  | Mo11 | 022  | 102.6(3) |
| 041  | Mo9  | 030  | 101.4(3) | 043  | Mo11 | 025  | 104.3(3) |
| 041  | Mo9  | 029  | 102.6(3) | 043  | Mo11 | 05   | 166.8(3) |
| 041  | Mo9  | 028  | 100.3(3) | 043  | Mo11 | 06   | 147.6(7) |
| 041  | Mo9  | 032  | 102.9(3) | 021  | Mo11 | 05   | 69.0(2)  |
| 041  | Mo9  | 07   | 168.1(3) | 021  | Mo11 | 06   | 96.1(7)  |
| 041  | Mo9  | 08   | 150.4(7) | 026  | Mo11 | 021  | 79.7(2)  |
| 030  | Mo9  | 028  | 80.2(2)  | 026  | Mo11 | 05   | 82.6(2)  |
| 030  | Mo9  | 07   | 83.1(2)  | 026  | Mo11 | 06   | 53.5(6)  |
| 030  | Mo9  | 08   | 58.9(6)  | 022  | Mo11 | 021  | 86.3(3)  |
| 029  | Mo9  | 030  | 154.2(3) | 022  | Mo11 | 026  | 153.6(3) |
| 029  | Mo9  | 028  | 86.3(2)  | 022  | Mo11 | 05   | 71.5(2)  |
| 029  | Mo9  | 07   | 71.6(2)  | 022  | Mo11 | 06   | 106.7(7) |
| 029  | Mo9  | 08   | 101.9(6) | 025  | Mo11 | 021  | 154.6(3) |
| 028  | Mo9  | 07   | 69.3(2)  | 025  | Mo11 | 026  | 86.4(2)  |
| 028  | Mo9  | 08   | 97.7(6)  | 025  | Mo11 | 022  | 97.5(3)  |
| 032  | Mo9  | 030  | 86.1(2)  | 025  | Mo11 | 05   | 88.4(2)  |
| 032  | Mo9  | 029  | 97.6(3)  | 025  | Mo11 | 06   | 58.7(7)  |
| 032  | Mo9  | 028  | 154.9(3) | 023  | Mo12 | 022  | 87.0(3)  |
| 032  | Mo9  | 07   | 88.3(2)  | 023  | Mo12 | 032  | 154.4(3) |
| 032  | Mo9  | 08   | 57.3(6)  | 023  | Mo12 | 05   | 71.8(2)  |
| 036  | Mo4  | 011  | 102.0(3) | 023  | Mo12 | 08   | 102.6(6) |

| Atom | Atom | Atom | Angle/°  |
|------|------|------|----------|
| 022  | Mo12 | 032  | 80.6(3)  |
| 022  | Mo12 | 05   | 69.6(2)  |
| 022  | Mo12 | 08   | 95.3(6)  |
| 031  | Mo12 | 023  | 96.9(3)  |
| 031  | Mo12 | 022  | 154.1(3) |
| 031  | Mo12 | 032  | 85.3(2)  |
| 031  | Mo12 | 05   | 87.2(2)  |
| 031  | Mo12 | 08   | 58.8(6)  |
| 044  | Mo12 | 023  | 102.6(3) |
| 044  | Mo12 | 022  | 99.3(3)  |
| 044  | Mo12 | 031  | 104.8(3) |
| 044  | Mo12 | 032  | 101.5(3) |
| 044  | Mo12 | 05   | 167.5(3) |
| 044  | Mo12 | 08   | 151.4(6) |
| 032  | Mo12 | 05   | 82.9(2)  |
| 032  | Mo12 | 08   | 56.9(6)  |
| 024  | Mo7  | 029  | 154.6(3) |
| 024  | Mo7  | 027  | 98.4(3)  |

| Atom | Atom | Atom | Angle/°  |
|------|------|------|----------|
| 024  | Mo7  | 025  | 85.5(2)  |
| 024  | Mo7  | 07   | 88.5(2)  |
| 024  | Mo7  | 06   | 54.9(6)  |
| 029  | Mo7  | 025  | 79.9(2)  |
| 029  | Mo7  | 07   | 69.2(2)  |
| 029  | Mo7  | 06   | 99.7(6)  |
| 027  | Mo7  | 029  | 86.8(3)  |
| 027  | Mo7  | 025  | 155.1(3) |
| 027  | Mo7  | 07   | 72.8(2)  |
| 027  | Mo7  | 06   | 106.4(7) |
| 039  | Mo7  | 024  | 104.2(3) |
| 039  | Mo7  | 029  | 98.9(3)  |
| 039  | Mo7  | 027  | 102.3(3) |
| 039  | Mo7  | 025  | 100.5(3) |
| 039  | Mo7  | 07   | 167.0(2) |
| 039  | Mo7  | 06   | 146.4(7) |
| 025  | Mo7  | 07   | 82.8(2)  |
| 025  | Mo7  | 06   | 56.0(6)  |

### Citations

L. Palatinus and G. Chapuis, Superflip - a computer program for the solution of crystal structures by charge flipping in arbitrary dimensions, *J. Appl. Cryst.*, (2007), **40**, 786-790.

O.V. Dolomanov and L.J. Bourhis and R.J. Gildea and J.A.K. Howard and H. Puschmann, Olex2: A complete structure solution, refinement and analysis program, *J. Appl. Cryst.*, (2009), **42**, 339-341.

SADABS, Bruker axs, Madison, WI (?).

SAINT - Software for the Integration of CCD Detector System Bruker Analytical X-ray Systems, Bruker axs, Madison, WI (?).

Sheldrick, G.M., Crystal structure refinement with ShelXL, *Acta Cryst.*, (2015), **C71**, 3-8.

# compound3

$R_1=4.76$

## Crystal Data and Experimental

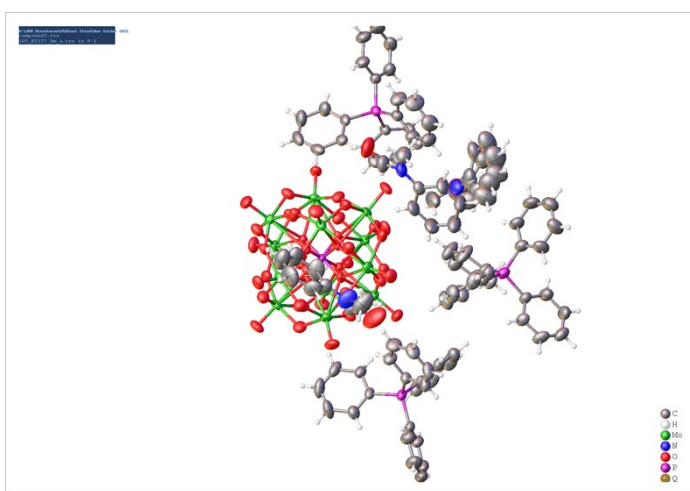

**Experimental.** Single clear light orange plate-shaped crystals of **compound3** recrystallised from N-Methyl Formanilide by slow evaporation. A suitable crystal with dimensions  $0.20 \times 0.18 \times 0.17 \text{ mm}^3$  was selected and mounted on a Bruker APEX-II CMOS detector diffractometer. The crystal was kept at a steady  $T = 292(2) \text{ K}$  during data collection. The structure was solved with the ShelXT 2014/4 (Sheldrick, 2014) solution program using iterative methods and by using Olex2 1.5-alpha (Dolomanov et al., 2009) as the graphical interface. The model was refined with ShelXL 2018/3 (Sheldrick, 2015) using full matrix least squares minimisation on  $F^2$ .

**Crystal Data.**  $\text{C}_{88}\text{H}_{78}\text{Mo}_{12}\text{N}_2\text{O}_{42}\text{P}_4$ ,  $M_r = 3110.68$ , triclinic,  $P-1$  (No. 2),  $a = 14.6105(11) \text{ \AA}$ ,  $b = 15.5593(11) \text{ \AA}$ ,  $c = 22.6072(16) \text{ \AA}$ ,  $\alpha = 89.026(3)^\circ$ ,  $\beta = 88.285(4)^\circ$ ,  $\gamma = 82.439(3)^\circ$ ,  $V = 5091.9(6) \text{ \AA}^3$ ,  $T = 292(2) \text{ K}$ ,  $Z = 2$ ,  $Z' = 1$ ,  $\mu(\text{MoK}\alpha) = 1.575$ , 215632 reflections measured, 25302 unique ( $R_{\text{int}} = 0.0504$ ) which were used in all calculations. The final  $wR_2$  was 0.1080 (all data) and  $R_1$  was 0.0476 ( $I \geq 2 \sigma(I)$ ).

| Compound                              | compound3                                                                   |
|---------------------------------------|-----------------------------------------------------------------------------|
| Formula                               | $\text{C}_{88}\text{H}_{78}\text{Mo}_{12}\text{N}_2\text{O}_{42}\text{P}_4$ |
| $D_{\text{calc.}} / \text{g cm}^{-3}$ | 2.029                                                                       |
| $\mu / \text{mm}^{-1}$                | 1.575                                                                       |
| Formula Weight                        | 3110.68                                                                     |
| Colour                                | clear light orange                                                          |
| Shape                                 | plate-shaped                                                                |
| Size/ $\text{mm}^3$                   | $0.20 \times 0.18 \times 0.17$                                              |
| $T / \text{K}$                        | 292(2)                                                                      |
| Crystal System                        | triclinic                                                                   |
| Space Group                           | $P-1$                                                                       |
| $a / \text{ \AA}$                     | 14.6105(11)                                                                 |
| $b / \text{ \AA}$                     | 15.5593(11)                                                                 |
| $c / \text{ \AA}$                     | 22.6072(16)                                                                 |
| $\alpha / ^\circ$                     | 89.026(3)                                                                   |
| $\beta / ^\circ$                      | 88.285(4)                                                                   |
| $\gamma / ^\circ$                     | 82.439(3)                                                                   |
| $V / \text{ \AA}^3$                   | 5091.9(6)                                                                   |
| $Z$                                   | 2                                                                           |
| $Z'$                                  | 1                                                                           |
| Wavelength/ $\text{ \AA}$             | 0.71073                                                                     |
| Radiation type                        | $\text{MoK}\alpha$                                                          |
| $\Theta_{\text{min}} / ^\circ$        | 2.221                                                                       |
| $\Theta_{\text{max}} / ^\circ$        | 28.332                                                                      |
| Measured Refl's.                      | 215632                                                                      |
| Indep't Refl's                        | 25302                                                                       |
| Refl's $I \geq 2 \sigma(I)$           | 18691                                                                       |
| $R_{\text{int}}$                      | 0.0504                                                                      |
| Parameters                            | 1504                                                                        |
| Restraints                            | 971                                                                         |
| Largest Peak                          | 2.002                                                                       |
| Deepest Hole                          | -1.696                                                                      |
| GooF                                  | 1.020                                                                       |
| $wR_2$ (all data)                     | 0.1080                                                                      |
| $wR_2$                                | 0.0964                                                                      |
| $R_1$ (all data)                      | 0.0720                                                                      |
| $R_1$                                 | 0.0476                                                                      |

## Structure Quality Indicators

|                     |                                    |               |               |             |          |              |            |              |
|---------------------|------------------------------------|---------------|---------------|-------------|----------|--------------|------------|--------------|
| <b>Reflections:</b> | d min (Mo)<br>$2\theta=56.7^\circ$ | <b>0.75</b>   | $I/\sigma(I)$ | <b>32.5</b> | Rint     | <b>5.04%</b> | Full 50.5° | <b>99.9</b>  |
| <b>Refinement:</b>  | Shift                              | <b>-0.001</b> | Max Peak      | <b>2.0</b>  | Min Peak | <b>-1.7</b>  | Goof       | <b>1.020</b> |

A clear light orange plate-shaped crystal with dimensions  $0.20 \times 0.18 \times 0.17 \text{ mm}^3$  was mounted. Data were collected using a Bruker APEX-II CMOS detector diffractometer operating at  $T = 292(2) \text{ K}$ .

Data were measured using phi and omega scans with  $\text{MoK}_\alpha$  radiation. The maximum resolution that was achieved was  $\theta = 28.332^\circ$  ( $0.75 \text{ \AA}$ ).

The unit cell was refined on 9580 reflections, 4% of the observed reflections.

Data reduction, scaling and absorption corrections were performed. The final completeness is 99.90 % out to  $28.332^\circ$  in  $\theta$ . SADABS-2008/1 (Bruker, 2008) was used for absorption correction. The absorption coefficient  $\mu$  of this material is  $1.575 \text{ mm}^{-1}$  at this wavelength ( $\lambda = 0.71073 \text{ \AA}$ ) and the minimum and maximum transmissions are 0.065 and 0.096.

The structure was solved and the space group  $P-1$  (# 2) determined by the ShelXT 2014/4 (Sheldrick, 2014) structure solution program using iterative methods and refined by full matrix least squares minimisation on  $F^2$  using version 2018/3 of ShelXL 2018/3 (Sheldrick, 2015). All non-hydrogen atoms were refined anisotropically. Hydrogen atom positions were calculated geometrically and refined using the riding model. Hydrogen atom positions were calculated geometrically and refined using the riding model.

*\_exptl\_absorpt\_process\_details*: SADABS-2008/1 (Bruker,2008) was used for absorption correction.

There is a single formula unit in the asymmetric unit, which is represented by the reported sum formula. In other words: Z is 2 and Z' is 1. The moiety formula is  $\text{Mo}_{12} \text{O}_{40} \text{P}_3(\text{C}_{24} \text{H}_{20} \text{P})_3(\text{C}_8 \text{H}_9 \text{N}_2 \text{O})_2$ .

## Data Plots: Diffraction Data

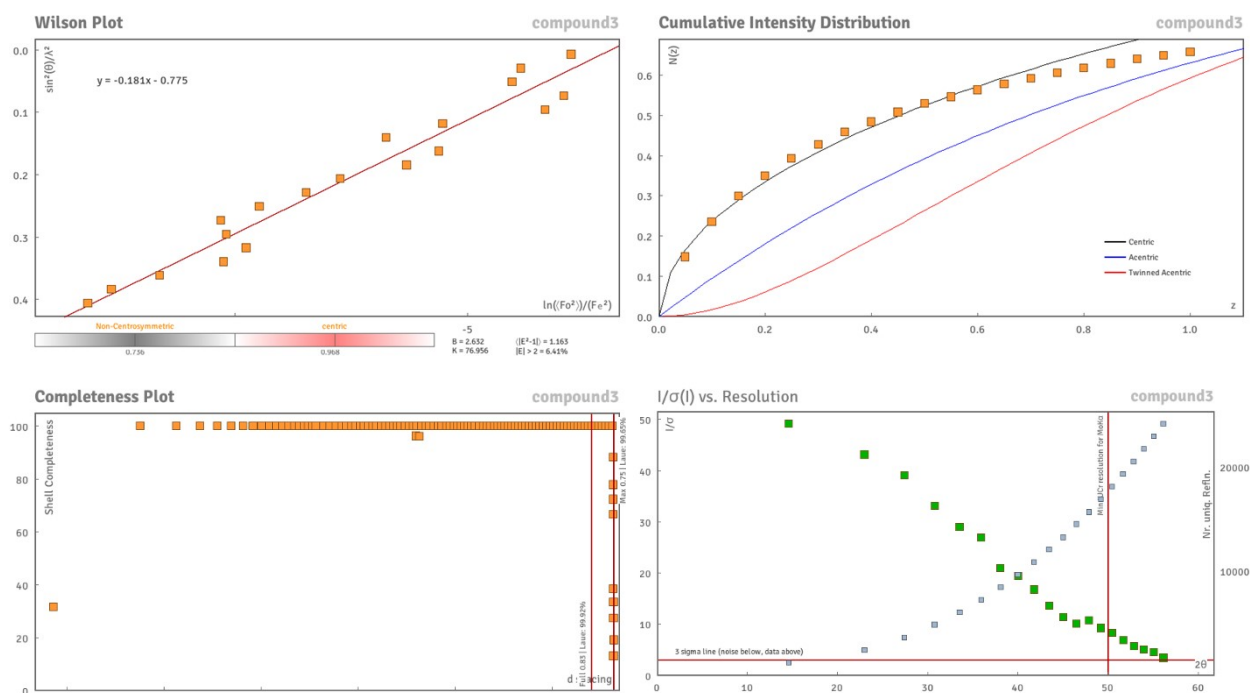

## Data Plots: Refinement and Data

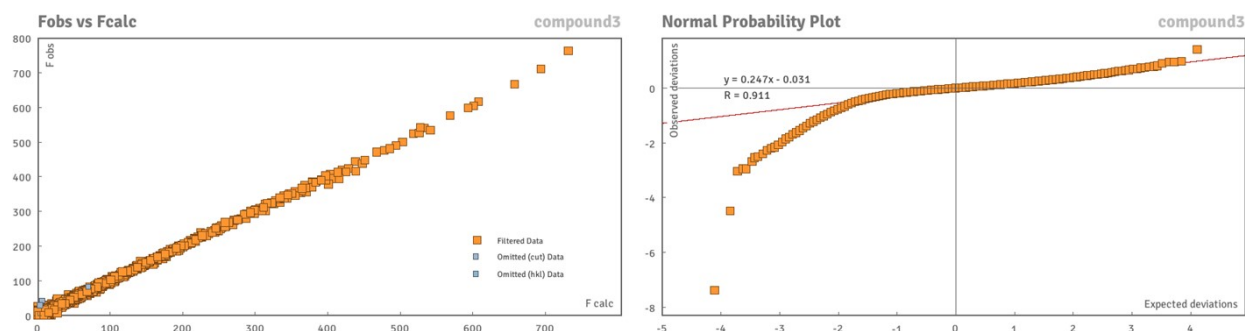

## Reflection Statistics

|                                     |                                                            |                                |                 |
|-------------------------------------|------------------------------------------------------------|--------------------------------|-----------------|
| Total reflections (after filtering) | 215666                                                     | Unique reflections             | 25302           |
| Completeness                        | 0.996                                                      | Mean I/ $\sigma$               | 18.38           |
| hkl <sub>max</sub> collected        | (19, 20, 30)                                               | hkl <sub>min</sub> collected   | (-19, -20, -30) |
| hkl <sub>max</sub> used             | (19, 20, 30)                                               | hkl <sub>min</sub> used        | (-19, -20, 0)   |
| Lim d <sub>max</sub> collected      | 100.0                                                      | Lim d <sub>min</sub> collected | 0.36            |
| d <sub>max</sub> used               | 9.17                                                       | d <sub>min</sub> used          | 0.75            |
| Friedel pairs                       | 25199                                                      | Friedel pairs merged           | 1               |
| Inconsistent equivalents            | 0                                                          | R <sub>int</sub>               | 0.0504          |
| R <sub>sigma</sub>                  | 0.0308                                                     | Intensity transformed          | 0               |
| Omitted reflections                 | 0                                                          | Omitted by user (OMIT hkl)     | 34              |
| Multiplicity                        | (1501, 6780, 12325, 9715, 6904, 6286, 3987, 2449, 537, 20) | Maximum multiplicity           | 18              |
| Removed systematic absences         | 0                                                          | Filtered off (Shel/OMIT)       | 0               |

There are no images if the crystal on the diffractometer, but the inclusion of these images has been requested from the GUI. Please uncheck the relevant box if you don't have these images!

**Table 10:** Fractional Atomic Coordinates ( $\times 10^4$ ) and Equivalent Isotropic Displacement Parameters ( $\text{\AA}^2 \times 10^3$ ) for **compound3**.  $U_{eq}$  is defined as 1/3 of the trace of the orthogonalised  $U_{ij}$ .

| Atom | x         | y         | z          | $U_{eq}$  |
|------|-----------|-----------|------------|-----------|
| Mo11 | 2668.8(3) | 4368.5(3) | 1618.5(2)  | 31.94(9)  |
| Mo8  | 2549.4(3) | 2634.3(3) | 4086.8(2)  | 33.48(10) |
| Mo7  | 410.3(3)  | 2331.6(3) | 3361.8(2)  | 31.95(9)  |
| Mo10 | 4501.7(3) | 2707.4(3) | 1637.5(2)  | 34.19(10) |
| Mo5  | 336.9(3)  | 2469.3(3) | 1834.3(2)  | 34.62(10) |
| Mo12 | 2972.4(3) | 4393.4(3) | 3216.6(2)  | 34.92(10) |
| Mo1  | 2336.1(3) | 574.7(3)  | 3369.5(2)  | 32.64(9)  |
| Mo4  | 2480.3(3) | 2412.0(3) | 946.4(2)   | 33.36(10) |
| Mo6  | 685.4(3)  | 4250.0(3) | 2639.7(2)  | 36.04(10) |
| Mo2  | 4200.2(3) | 664.4(3)  | 2407.9(2)  | 38.49(11) |
| Mo3  | 2041.1(4) | 527.6(3)  | 1859.0(2)  | 41.09(11) |
| Mo9  | 4582.9(3) | 2561.1(3) | 3257.4(2)  | 39.69(11) |
| P1   | 2485.4(8) | 2492.1(7) | 2517.1(5)  | 21.45(19) |
| O26  | 2401(2)   | 3691(2)   | 993.5(15)  | 39.8(8)   |
| O18  | 1106(2)   | 1264(2)   | 3361.2(16) | 40.0(8)   |
| O20  | 1335(2)   | 2688(2)   | 3887.8(15) | 39.5(7)   |
| O32  | 2629(3)   | 3799(2)   | 3972.6(17) | 45.1(8)   |
| O27  | 3101(2)   | 4543(3)   | 2421.7(15) | 44.3(8)   |
| O24  | 3746(3)   | 2372(2)   | 978.6(16)  | 43.6(8)   |
| O25  | 3975(2)   | 3835(2)   | 1497.8(16) | 40.4(8)   |

| Atom | x          | y          | z          | $U_{eq}$ |
|------|------------|------------|------------|----------|
| O30  | 4156(2)    | 3823(2)    | 3317.6(18) | 47.1(9)  |
| O22  | 4543(3)    | 1458(2)    | 3010.1(15) | 48.3(9)  |
| O29  | 1513(2)    | 4439(3)    | 1958.6(15) | 45.2(8)  |
| O35  | 1799(3)    | -293(2)    | 1457.1(16) | 49.9(9)  |
| O19  | 2654(2)    | 1405(2)    | 3862.7(16) | 40.6(8)  |
| O28  | 1643(2)    | 4455(3)    | 3093.2(15) | 44.9(8)  |
| O14  | 1212(3)    | 2652(2)    | 1278.5(17) | 44.1(8)  |
| O16  | 75(3)      | 3621(2)    | 2048.9(15) | 45.3(8)  |
| O8   | 2944(2)    | 2850(2)    | 3046.7(15) | 24.1(7)  |
| O17  | 138(3)     | 3596(2)    | 3213.3(15) | 44.4(8)  |
| O11  | 1915(3)    | 95(3)      | 2630.8(16) | 48.2(9)  |
| O9   | 3533(3)    | 193(3)     | 3100.7(16) | 49.7(9)  |
| O21  | 4476(3)    | 1473(2)    | 1869.1(16) | 46.8(9)  |
| O38  | -35(2)     | 5177(2)    | 2636.2(16) | 41.6(8)  |
| O23  | 4740(3)    | 2865(2)    | 2415.3(16) | 48.0(9)  |
| O33  | 2134(3)    | -233(2)    | 3832.8(17) | 48.7(9)  |
| O6   | 2864(2)    | 2833(2)    | 1946.3(15) | 24.2(7)  |
| O12  | 963(3)     | 1274(2)    | 1892.3(17) | 47.4(9)  |
| O31  | 3919(3)    | 2436(2)    | 3966.4(18) | 49.3(9)  |
| O37  | -583(3)    | 2348(3)    | 1444.4(17) | 54.0(10) |
| O1   | 2682(3)    | 1496(2)    | 2539.7(15) | 25.3(7)  |
| O10  | 3389(3)    | 165(3)     | 1941.6(16) | 51.5(9)  |
| O15  | -130(3)    | 2192(2)    | 2645.0(15) | 44.8(8)  |
| O13  | 2465(3)    | 1309(2)    | 1250.3(17) | 49.8(9)  |
| O40  | 2497(3)    | 2558(3)    | 4825.8(15) | 54.1(10) |
| O3   | 1440(2)    | 2755(2)    | 2575.9(15) | 22.7(6)  |
| O42  | 5523(3)    | 2662(3)    | 1289.7(19) | 56.0(10) |
| O44  | 3059(3)    | 5357(2)    | 3498.2(16) | 48.6(9)  |
| O39  | -459(3)    | 2201(3)    | 3837.4(18) | 54.8(10) |
| O34  | 5113(3)    | -95(2)     | 2379.4(18) | 54.0(10) |
| O36  | 2316(3)    | 2329(3)    | 227.6(15)  | 51.4(10) |
| O43  | 2721(3)    | 5325(2)    | 1291.9(18) | 52.2(10) |
| O41  | 5653(3)    | 2551(3)    | 3493.9(18) | 51.0(9)  |
| P4   | 936.1(10)  | 7423.1(9)  | 4012.4(6)  | 38.1(3)  |
| C51  | 145(4)     | 8369(3)    | 4209(2)    | 42.0(12) |
| C57  | 1233(4)    | 7426(3)    | 3236(2)    | 39.5(11) |
| C56  | 88(4)      | 9113(4)    | 3866(3)    | 54.4(15) |
| C63  | 378(4)     | 6481(3)    | 4165(2)    | 41.0(12) |
| C45  | 1966(4)    | 7399(3)    | 4429(2)    | 44.1(12) |
| C58  | 1755(5)    | 8040(4)    | 2993(3)    | 55.7(16) |
| C65  | 477(5)     | 4944(4)    | 4297(3)    | 57.1(17) |
| C64  | 903(4)     | 5697(4)    | 4270(2)    | 46.7(13) |
| C52  | -354(4)    | 8359(4)    | 4743(3)    | 58.6(16) |
| C68  | -571(5)    | 6526(4)    | 4093(3)    | 62.1(17) |
| C62  | 956(4)     | 6802(4)    | 2876(2)    | 50.9(14) |
| C66  | -452(6)    | 4992(4)    | 4233(3)    | 65.0(19) |
| C61  | 1172(5)    | 6803(5)    | 2278(3)    | 67.6(19) |
| C59  | 1967(5)    | 8033(4)    | 2396(3)    | 69(2)    |
| C50  | 2829(4)    | 7139(4)    | 4171(3)    | 58.3(16) |
| C67  | -981(5)    | 5775(5)    | 4132(3)    | 70.0(19) |
| C46  | 1906(5)    | 7625(5)    | 5018(3)    | 68.4(19) |
| C53  | -902(5)    | 9096(5)    | 4926(4)    | 73(2)    |
| C55  | -471(5)    | 9856(4)    | 4060(4)    | 72(2)    |
| C54  | -958(5)    | 9840(5)    | 4587(4)    | 83(3)    |
| C48  | 3542(6)    | 7356(6)    | 5074(4)    | 84(2)    |
| C49  | 3614(5)    | 7119(5)    | 4502(4)    | 72(2)    |
| C60  | 1659(6)    | 7421(5)    | 2040(3)    | 75(2)    |
| C47  | 2705(6)    | 7597(6)    | 5339(3)    | 88(3)    |
| P2   | 7618.5(10) | 5831.4(10) | 1512.5(7)  | 47.6(3)  |
| C19  | 7517(4)    | 4940(4)    | 2013(3)    | 48.9(13) |
| C6   | 9252(4)    | 4857(4)    | 1144(2)    | 48.6(14) |
| C13  | 6668(4)    | 5909(4)    | 1027(3)    | 50.8(14) |
| C7   | 7640(4)    | 6827(4)    | 1903(3)    | 51.6(14) |

| Atom | x         | y        | z        | $U_{eq}$ |
|------|-----------|----------|----------|----------|
| C5   | 10113(4)  | 4754(5)  | 878(3)   | 59.2(17) |
| C24  | 7873(4)   | 4930(4)  | 2577(3)  | 55.8(15) |
| C15  | 6017(5)   | 6032(5)  | 70(3)    | 67.8(19) |
| C1   | 8701(4)   | 5642(4)  | 1109(2)  | 45.9(13) |
| C4   | 10433(5)  | 5412(5)  | 570(3)   | 66.2(18) |
| C14  | 6777(4)   | 5971(4)  | 421(3)   | 56.9(16) |
| C16  | 5156(5)   | 6026(5)  | 313(3)   | 71(2)    |
| C8   | 6889(5)   | 7471(4)  | 1918(3)  | 62.5(17) |
| C12  | 8440(5)   | 6964(4)  | 2187(3)  | 71(2)    |
| C20  | 7145(6)   | 4216(5)  | 1826(3)  | 76(2)    |
| C23  | 7869(5)   | 4196(5)  | 2935(3)  | 71(2)    |
| C2   | 9008(5)   | 6321(4)  | 774(3)   | 68.0(19) |
| C9   | 6943(6)   | 8221(5)  | 2220(4)  | 80(2)    |
| C3   | 9878(5)   | 6190(5)  | 513(4)   | 78(2)    |
| C18  | 5784(5)   | 5904(6)  | 1267(3)  | 86(3)    |
| C10  | 7717(6)   | 8345(5)  | 2505(4)  | 82(2)    |
| C22  | 7486(6)   | 3503(5)  | 2744(4)  | 81(2)    |
| C11  | 8473(6)   | 7713(5)  | 2487(4)  | 81(2)    |
| C17  | 5034(5)   | 5965(7)  | 907(3)   | 89(3)    |
| C21  | 7122(7)   | 3508(5)  | 2194(4)  | 89(3)    |
| P3   | 7575.1(9) | 401.4(9) | 820.8(6) | 36.2(3)  |
| C37  | 6529(4)   | -65(4)   | 734(2)   | 40.3(12) |
| C39  | 7723(4)   | 582(3)   | 1591(2)  | 38.5(11) |
| C31  | 7498(3)   | 1418(4)  | 428(2)   | 39.2(11) |
| C25  | 8533(4)   | -338(4)  | 538(2)   | 43.1(12) |
| C102 | 5679(4)   | 462(4)   | 766(2)   | 47.7(13) |
| C40  | 6957(4)   | 722(4)   | 1967(2)  | 52.4(14) |
| C42  | 7935(5)   | 890(5)   | 2776(3)  | 64.0(18) |
| C38  | 6561(4)   | -947(4)  | 684(3)   | 54.1(15) |
| C32  | 7741(4)   | 2147(4)  | 697(3)   | 46.9(13) |
| C26  | 8766(4)   | -324(4)  | -61(3)   | 55.1(15) |
| C101 | 4872(4)   | 90(5)    | 787(3)   | 59.4(17) |
| C43  | 8705(5)   | 740(4)   | 2408(3)  | 61.2(18) |
| C44  | 8605(4)   | 598(4)   | 1813(2)  | 52.3(15) |
| C41  | 7068(5)   | 880(5)   | 2561(3)  | 66.0(18) |
| C33  | 7708(5)   | 2916(4)  | 375(3)   | 61.2(17) |
| C34  | 7424(5)   | 2961(5)  | -195(3)  | 73(2)    |
| C35  | 7173(5)   | 2248(6)  | -461(3)  | 79(2)    |
| C27  | 9480(5)   | -916(5)  | -278(4)  | 71(2)    |
| C100 | 4915(5)   | -794(6)  | 764(3)   | 71(2)    |
| C28  | 9956(5)   | -1495(5) | 84(4)    | 82(3)    |
| C99  | 5733(5)   | -1302(5) | 699(3)   | 72(2)    |
| C36  | 7208(4)   | 1474(5)  | -155(3)  | 59.9(17) |
| C30  | 9010(5)   | -949(4)  | 902(3)   | 63.6(17) |
| C29  | 9736(6)   | -1522(5) | 678(4)   | 86(2)    |
| O47  | 3971(5)   | 7688(5)  | 1630(3)  | 113(2)   |
| N3   | 4493(5)   | 7222(4)  | 2525(3)  | 80.0(18) |
| C97  | 4371(5)   | 7795(5)  | 2078(4)  | 75(2)    |
| C85  | 5035(15)  | 7368(12) | 3002(8)  | 68(5)    |
| C98  | 4123(7)   | 6405(6)  | 2501(4)  | 105(3)   |
| C90  | 4959(15)  | 8157(13) | 3257(8)  | 77(5)    |
| C86  | 5625(18)  | 6590(14) | 3201(10) | 108(7)   |
| C88  | 6170(20)  | 7583(16) | 3886(11) | 108(7)   |
| C89  | 5565(19)  | 8287(13) | 3697(9)  | 96(6)    |
| C87  | 6269(18)  | 6796(16) | 3595(11) | 122(7)   |
| O45  | 6623(12)  | 623(11)  | 3937(6)  | 137(6)   |
| N1   | 5824(10)  | 273(10)  | 4751(6)  | 90(4)    |
| C69  | 4980(20)  | 138(12)  | 5046(11) | 55(4)    |
| C71  | 3357(12)  | 497(12)  | 5161(8)  | 81(5)    |
| C75  | 5870(30)  | 480(30)  | 4170(20) | 82(13)   |
| C74  | 4998(12)  | -446(10) | 5515(7)  | 77(4)    |
| C70  | 4169(12)  | 606(11)  | 4880(7)  | 89(5)    |
| C72  | 3344(13)  | -97(13)  | 5620(10) | 100(6)   |



| Atom | x        | y        | z        | $U_{eq}$ |
|------|----------|----------|----------|----------|
| C76  | 6636(14) | 185(17)  | 5098(10) | 122(7)   |
| C73  | 4140(40) | -590(40) | 5760(30) | 110(18)  |
| O46  | 2625(8)  | 5227(9)  | 5432(6)  | 109(4)   |
| N2   | 4191(7)  | 5145(7)  | 5359(5)  | 57(2)    |
| C84  | 4250(30) | 5300(50) | 5981(18) | 79(8)    |
| C78  | 5741(10) | 5452(10) | 5179(6)  | 68(4)    |
| C79  | 6535(15) | 5382(14) | 4824(10) | 91(7)    |
| C82  | 5060(10) | 4612(9)  | 4478(6)  | 64(3)    |
| C80  | 6593(14) | 4912(13) | 4304(8)  | 99(6)    |
| C81  | 5860(40) | 4560(40) | 4116(19) | 90(14)   |
| C83  | 3348(13) | 5132(12) | 5141(10) | 73(5)    |
| C77  | 5000(50) | 5060(40) | 5000(40) | 50(4)    |
| C91  | 4934(13) | 7461(11) | 3049(8)  | 84(6)    |
| C96  | 4570(16) | 8219(10) | 3335(9)  | 101(7)   |
| C95  | 4990(20) | 8477(11) | 3834(8)  | 124(8)   |
| C94  | 5771(18) | 7977(16) | 4048(8)  | 134(8)   |
| C93  | 6135(12) | 7219(17) | 3762(9)  | 133(9)   |
| C92  | 5717(12) | 6961(13) | 3262(8)  | 106(7)   |
| O7   | 2315(10) | 3521(9)  | 2457(7)  | 29(3)    |
| O2   | 2025(12) | 2173(10) | 1949(6)  | 32(4)    |
| O5   | 3531(10) | 2245(10) | 2418(7)  | 34(4)    |
| O4   | 2106(11) | 2192(10) | 3057(7)  | 33(4)    |

**Table 11:** Anisotropic Displacement Parameters ( $\times 10^4$ ) for **compound3**. The anisotropic displacement factor exponent takes the form:  $-2\pi^2[h^2a^{*2} \times U_{11} + \dots + 2hka^* \times b^* \times U_{12}]$

| Atom | $U_{11}$ | $U_{22}$ | $U_{33}$  | $U_{23}$   | $U_{13}$   | $U_{12}$   |
|------|----------|----------|-----------|------------|------------|------------|
| Mo11 | 39.7(2)  | 27.8(2)  | 28.33(19) | 5.90(15)   | 1.81(16)   | -6.11(16)  |
| Mo8  | 46.5(2)  | 33.1(2)  | 22.18(18) | 0.91(15)   | -2.92(16)  | -9.97(18)  |
| Mo7  | 32.8(2)  | 34.6(2)  | 27.99(19) | 3.90(16)   | 5.04(16)   | -4.85(17)  |
| Mo10 | 30.3(2)  | 38.4(2)  | 33.2(2)   | 4.60(17)   | 4.40(16)   | -4.28(17)  |
| Mo5  | 30.0(2)  | 35.6(2)  | 40.0(2)   | -3.59(17)  | -11.16(17) | -8.16(17)  |
| Mo12 | 37.6(2)  | 26.4(2)  | 42.4(2)   | -9.90(17)  | -6.67(18)  | -7.73(17)  |
| Mo1  | 43.2(2)  | 27.7(2)  | 27.69(19) | 5.22(15)   | 0.05(17)   | -7.75(17)  |
| Mo4  | 43.5(2)  | 35.5(2)  | 21.42(18) | 0.57(15)   | 1.42(16)   | -6.92(18)  |
| Mo6  | 35.2(2)  | 30.3(2)  | 39.8(2)   | -3.78(17)  | -5.77(18)  | 7.78(17)   |
| Mo2  | 37.5(2)  | 30.0(2)  | 44.3(2)   | -2.96(18)  | 0.43(19)   | 8.97(17)   |
| Mo3  | 57.6(3)  | 27.9(2)  | 39.5(2)   | -11.29(17) | -2.6(2)    | -10.43(19) |
| Mo9  | 30.7(2)  | 42.7(2)  | 45.9(3)   | 0.90(19)   | -15.03(19) | -2.88(18)  |
| P1   | 24.3(5)  | 19.4(4)  | 20.8(4)   | -1.7(4)    | -2.6(4)    | -3.0(4)    |
| O26  | 41.0(19) | 35.7(17) | 42.3(18)  | -1.5(14)   | -7.8(15)   | -1.3(14)   |
| O18  | 42.8(18) | 32.4(17) | 46(2)     | -2.3(14)   | -10.8(14)  | -4.4(14)   |
| O20  | 42.9(18) | 31.2(17) | 44.3(18)  | -5.7(14)   | -7.2(14)   | -2.3(14)   |
| O32  | 46(2)    | 33.3(17) | 55(2)     | 2.6(15)    | 6.0(16)    | -3.6(14)   |
| O27  | 35.4(18) | 61(2)    | 37.7(17)  | -6.0(15)   | -3.7(13)   | -7.7(17)   |
| O24  | 47(2)    | 39.5(19) | 43.7(19)  | -7.5(15)   | -3.1(15)   | -1.5(15)   |
| O25  | 35.7(18) | 38.7(18) | 47(2)     | -1.5(14)   | -7.2(14)   | -4.1(14)   |
| O30  | 37.3(19) | 38.6(18) | 66(2)     | 8.4(16)    | 2.6(16)    | -8.0(14)   |
| O22  | 67(2)    | 43.2(19) | 34.7(17)  | 5.6(14)    | -12.2(17)  | -7.4(16)   |
| O29  | 36.0(18) | 65(2)    | 34.1(17)  | -4.0(16)   | -4.6(14)   | -4.2(16)   |
| O35  | 80(3)    | 30.4(18) | 41.3(19)  | -8.2(15)   | -8.9(19)   | -12.9(17)  |
| O19  | 44.1(19) | 31.3(16) | 46.0(19)  | -1.5(14)   | -13.8(16)  | -0.7(14)   |
| O28  | 37.6(18) | 63(2)    | 33.9(17)  | -10.0(16)  | -0.7(14)   | -5.0(15)   |
| O14  | 42.9(19) | 34.1(18) | 54(2)     | 4.8(15)    | 6.8(16)    | -2.7(14)   |
| O16  | 68(2)    | 33.2(17) | 34.3(17)  | 4.7(13)    | -15.2(16)  | -5.2(16)   |
| O8   | 28.9(17) | 22.6(16) | 21.5(14)  | -1.0(12)   | -4.6(12)   | -4.9(13)   |
| O17  | 64(2)    | 33.3(17) | 35.3(17)  | -3.9(13)   | -7.6(16)   | -4.5(15)   |
| O11  | 52(2)    | 56(2)    | 38.7(18)  | -6.6(16)   | -2.8(15)   | -13.6(18)  |
| O9   | 48(2)    | 61(2)    | 39.6(19)  | -0.2(17)   | -0.2(15)   | -3.2(17)   |
| O21  | 68(2)    | 35.1(18) | 37.3(18)  | -0.1(14)   | -6.3(16)   | -6.6(16)   |
| O38  | 37.0(18) | 30.0(17) | 56(2)     | 1.5(15)    | -1.3(16)   | 3.4(14)    |

| Atom | $U_{11}$ | $U_{22}$ | $U_{33}$ | $U_{23}$  | $U_{13}$  | $U_{12}$  |
|------|----------|----------|----------|-----------|-----------|-----------|
| O23  | 64(2)    | 40.9(19) | 40.6(18) | 3.4(14)   | -9.6(15)  | -12.1(18) |
| O33  | 60(2)    | 33.1(18) | 54(2)    | 12.6(16)  | -6.9(18)  | -12.8(16) |
| O6   | 28.6(17) | 23.6(16) | 20.3(14) | 2.2(12)   | -0.8(12)  | -3.2(13)  |
| O12  | 51(2)    | 32.2(17) | 60(2)    | 4.7(15)   | 9.0(16)   | -9.8(15)  |
| O31  | 46(2)    | 42(2)    | 57(2)    | 9.5(17)   | 2.9(16)   | 0.3(16)   |
| O37  | 43(2)    | 78(3)    | 46(2)    | 5.5(19)   | -17.2(17) | -24.9(19) |
| O1   | 32.2(18) | 18.3(12) | 25.2(16) | -1.3(12)  | -1.2(14)  | -2.1(12)  |
| O10  | 56(2)    | 61(2)    | 37.9(19) | -11.9(17) | 4.6(16)   | -7.1(18)  |
| O15  | 63(2)    | 36.6(18) | 36.4(17) | 1.0(14)   | -8.4(15)  | -11.7(17) |
| O13  | 57(2)    | 32.4(18) | 57(2)    | 4.3(16)   | 15.2(18)  | 0.6(15)   |
| O40  | 70(3)    | 63(3)    | 28.3(18) | -4.9(16)  | -9.3(16)  | -4(2)     |
| O3   | 24.4(13) | 21.2(16) | 22.6(16) | -0.1(13)  | -2.0(12)  | -3.1(12)  |
| O42  | 40(2)    | 62(3)    | 66(3)    | -7(2)     | 17.8(18)  | -9.2(17)  |
| O44  | 75(3)    | 32.8(18) | 41(2)    | -7.8(15)  | -0.8(18)  | -19.9(17) |
| O39  | 46(2)    | 65(3)    | 54(2)    | -5.2(19)  | 18.7(18)  | -13.2(19) |
| O34  | 53(2)    | 41(2)    | 61(2)    | 6.7(17)   | 9.9(18)   | 16.7(18)  |
| O36  | 68(3)    | 58(2)    | 27.2(17) | -7.4(15)  | -8.1(16)  | -3(2)     |
| O43  | 61(2)    | 32.8(18) | 65(2)    | 18.6(17)  | -10(2)    | -13.9(16) |
| O41  | 36.4(19) | 60(2)    | 57(2)    | 0.6(19)   | -18.0(17) | -5.8(17)  |
| P4   | 44.8(8)  | 35.3(7)  | 34.8(6)  | -3.1(5)   | 5.5(5)    | -9.1(6)   |
| C51  | 40(3)    | 39(3)    | 46(3)    | -4(2)     | 2(2)      | -5(2)     |
| C57  | 50(3)    | 34(3)    | 35(3)    | -3(2)     | 4(2)      | -10(2)    |
| C56  | 44(3)    | 51(3)    | 67(4)    | 6(3)      | 0(3)      | -4(3)     |
| C63  | 50(3)    | 42(3)    | 33(2)    | -1(2)     | 9(2)      | -16(2)    |
| C45  | 48(3)    | 38(3)    | 46(3)    | -6(2)     | 1(2)      | -6(2)     |
| C58  | 75(4)    | 37(3)    | 57(4)    | -8(3)     | 22(3)     | -20(3)    |
| C65  | 84(5)    | 40(3)    | 46(3)    | -4(2)     | 21(3)     | -9(3)     |
| C64  | 53(3)    | 44(3)    | 42(3)    | -2(2)     | 15(2)     | -8(3)     |
| C52  | 57(4)    | 64(4)    | 52(4)    | -9(3)     | 13(3)     | -3(3)     |
| C68  | 58(4)    | 54(4)    | 76(4)    | 10(3)     | 2(3)      | -15(3)    |
| C62  | 68(4)    | 50(3)    | 40(3)    | -5(2)     | 6(3)      | -26(3)    |
| C66  | 95(6)    | 57(4)    | 50(4)    | -10(3)    | 22(3)     | -42(4)    |
| C61  | 90(5)    | 77(5)    | 41(3)    | -15(3)    | 8(3)      | -31(4)    |
| C59  | 103(6)   | 40(3)    | 62(4)    | 7(3)      | 33(4)     | -12(3)    |
| C50  | 55(4)    | 62(4)    | 56(4)    | -14(3)    | -1(3)     | -1(3)     |
| C67  | 63(4)    | 73(5)    | 80(5)    | 7(4)      | 3(4)      | -33(4)    |
| C46  | 65(4)    | 98(6)    | 41(3)    | -13(3)    | 4(3)      | -5(4)     |
| C53  | 61(4)    | 74(5)    | 81(5)    | -16(4)    | 23(4)     | 1(4)      |
| C55  | 55(4)    | 46(4)    | 114(6)   | 9(4)      | 0(4)      | -1(3)     |
| C54  | 56(4)    | 56(4)    | 134(8)   | -24(5)    | 12(5)     | 8(3)      |
| C48  | 74(5)    | 90(6)    | 88(6)    | -8(5)     | -29(5)    | -2(4)     |
| C49  | 50(4)    | 85(5)    | 81(5)    | -16(4)    | -4(4)     | -3(4)     |
| C60  | 117(7)   | 64(4)    | 41(3)    | 1(3)      | 21(4)     | -14(4)    |
| C47  | 87(6)    | 125(7)   | 50(4)    | -18(4)    | -20(4)    | -4(5)     |
| P2   | 39.3(8)  | 52.8(9)  | 47.9(8)  | 2.2(7)    | 4.3(6)    | 2.8(6)    |
| C19  | 46(3)    | 53(3)    | 47(3)    | 4(3)      | 4(2)      | -3(3)     |
| C6   | 46(3)    | 54(3)    | 42(3)    | 14(3)     | 0(2)      | 4(3)      |
| C13  | 35(3)    | 63(4)    | 52(3)    | 0(3)      | 3(2)      | 0(3)      |
| C7   | 48(3)    | 50(3)    | 53(3)    | 3(3)      | 2(3)      | 5(3)      |
| C5   | 50(4)    | 74(4)    | 45(3)    | 13(3)     | -1(3)     | 22(3)     |
| C24  | 43(3)    | 66(4)    | 60(4)    | 5(3)      | -8(3)     | -10(3)    |
| C15  | 64(4)    | 91(5)    | 48(4)    | 19(3)     | -1(3)     | -13(4)    |
| C1   | 36(3)    | 51(3)    | 48(3)    | 2(2)      | 3(2)      | 1(2)      |
| C4   | 45(4)    | 93(5)    | 59(4)    | -8(4)     | 8(3)      | -3(3)     |
| C14  | 49(3)    | 70(4)    | 50(3)    | 19(3)     | 8(3)      | -9(3)     |
| C16  | 51(4)    | 97(6)    | 65(4)    | -1(4)     | -11(3)    | -5(4)     |
| C8   | 48(4)    | 57(4)    | 76(4)    | 5(3)      | 3(3)      | 12(3)     |
| C12  | 65(4)    | 50(4)    | 93(5)    | -5(4)     | -18(4)    | 12(3)     |
| C20  | 103(6)   | 78(5)    | 54(4)    | 2(4)      | -8(4)     | -30(5)    |
| C23  | 59(4)    | 93(6)    | 60(4)    | 20(4)     | -11(3)    | -12(4)    |
| C2   | 66(4)    | 46(4)    | 88(5)    | 4(3)      | 20(4)     | 1(3)      |
| C9   | 72(5)    | 55(4)    | 103(6)   | -2(4)     | 17(5)     | 21(4)     |
| C3   | 76(5)    | 61(4)    | 99(6)    | -4(4)     | 36(4)     | -22(4)    |

| Atom | $U_{11}$ | $U_{22}$ | $U_{33}$ | $U_{23}$ | $U_{13}$ | $U_{12}$ |
|------|----------|----------|----------|----------|----------|----------|
| C18  | 48(4)    | 164(9)   | 46(4)    | -5(4)    | 8(3)     | -15(5)   |
| C10  | 97(6)    | 54(4)    | 95(6)    | -10(4)   | 1(5)     | -4(4)    |
| C22  | 84(6)    | 81(5)    | 81(5)    | 27(4)    | -2(4)    | -23(4)   |
| C11  | 82(5)    | 56(4)    | 106(6)   | -7(4)    | -31(5)   | -3(4)    |
| C17  | 42(4)    | 161(9)   | 65(5)    | -6(5)    | 4(3)     | -17(5)   |
| C21  | 121(7)   | 73(5)    | 81(6)    | 5(4)     | 3(5)     | -47(5)   |
| P3   | 32.6(6)  | 47.2(7)  | 30.6(6)  | -4.4(5)  | 2.2(5)   | -11.9(6) |
| C37  | 39(3)    | 55(3)    | 30(2)    | -9(2)    | 4(2)     | -18(2)   |
| C39  | 41(3)    | 45(3)    | 31(2)    | 0(2)     | -4(2)    | -11(2)   |
| C31  | 29(2)    | 52(3)    | 38(3)    | 3(2)     | -1(2)    | -10(2)   |
| C25  | 33(3)    | 49(3)    | 49(3)    | -8(2)    | 5(2)     | -12(2)   |
| C102 | 39(3)    | 63(4)    | 42(3)    | -12(3)   | 4(2)     | -10(3)   |
| C40  | 50(3)    | 73(4)    | 34(3)    | -7(3)    | 1(2)     | -7(3)    |
| C42  | 89(5)    | 74(5)    | 34(3)    | -3(3)    | -12(3)   | -30(4)   |
| C38  | 54(4)    | 54(4)    | 58(4)    | -3(3)    | -10(3)   | -15(3)   |
| C32  | 39(3)    | 55(3)    | 48(3)    | 1(3)     | -4(2)    | -8(2)    |
| C26  | 53(4)    | 64(4)    | 50(3)    | -17(3)   | 12(3)    | -13(3)   |
| C101 | 36(3)    | 104(6)   | 41(3)    | -4(3)    | -2(2)    | -19(3)   |
| C43  | 75(5)    | 75(4)    | 42(3)    | 7(3)     | -18(3)   | -39(4)   |
| C44  | 52(3)    | 69(4)    | 42(3)    | 8(3)     | -6(3)    | -30(3)   |
| C41  | 80(5)    | 82(5)    | 35(3)    | -10(3)   | 6(3)     | -11(4)   |
| C33  | 56(4)    | 50(4)    | 77(5)    | 7(3)     | -3(3)    | -9(3)    |
| C34  | 60(4)    | 78(5)    | 79(5)    | 35(4)    | -7(4)    | -4(4)    |
| C35  | 69(5)    | 118(7)   | 50(4)    | 32(4)    | -15(3)   | -17(5)   |
| C27  | 67(5)    | 73(5)    | 78(5)    | -30(4)   | 35(4)    | -28(4)   |
| C100 | 55(4)    | 106(6)   | 63(4)    | 22(4)    | -19(3)   | -45(4)   |
| C28  | 65(5)    | 55(4)    | 126(7)   | -25(5)   | 41(5)    | -12(4)   |
| C99  | 77(5)    | 63(4)    | 86(5)    | 10(4)    | -30(4)   | -40(4)   |
| C36  | 58(4)    | 83(5)    | 42(3)    | 8(3)     | -12(3)   | -19(3)   |
| C30  | 62(4)    | 58(4)    | 67(4)    | 1(3)     | 9(3)     | 2(3)     |
| C29  | 71(5)    | 64(5)    | 116(7)   | -1(5)    | 13(5)    | 10(4)    |
| O47  | 128(6)   | 153(6)   | 70(4)    | -8(4)    | -7(4)    | -55(5)   |
| N3   | 94(5)    | 68(4)    | 80(4)    | 5(3)     | 23(4)    | -25(3)   |
| C97  | 72(5)    | 82(5)    | 74(5)    | 7(4)     | 2(4)     | -20(4)   |
| C85  | 72(10)   | 67(9)    | 64(9)    | 11(8)    | 11(8)    | -12(9)   |
| C98  | 142(8)   | 83(6)    | 98(6)    | -18(5)   | 57(6)    | -54(6)   |
| C90  | 78(11)   | 78(10)   | 77(10)   | 13(8)    | -14(8)   | -18(9)   |
| C86  | 128(14)  | 89(12)   | 103(12)  | 19(11)   | -4(11)   | 4(11)    |
| C88  | 130(14)  | 96(13)   | 93(12)   | -12(10)  | -43(11)  | 14(11)   |
| C89  | 104(13)  | 95(11)   | 91(11)   | -1(9)    | -31(10)  | -12(10)  |
| C87  | 153(15)  | 103(13)  | 105(13)  | 0(11)    | -44(12)  | 9(12)    |
| O45  | 134(13)  | 164(15)  | 101(10)  | 54(10)   | 46(9)    | 14(11)   |
| N1   | 75(8)    | 117(10)  | 69(7)    | 43(7)    | -16(6)   | 16(7)    |
| C69  | 56(5)    | 60(8)    | 48(6)    | 11(6)    | -12(4)   | -1(6)    |
| C71  | 57(9)    | 93(12)   | 91(12)   | 35(10)   | -27(9)   | -5(9)    |
| C75  | 69(18)   | 110(30)  | 56(13)   | 34(15)   | 3(12)    | 27(18)   |
| C74  | 85(11)   | 67(9)    | 73(10)   | 30(8)    | -15(9)   | 18(8)    |
| C70  | 84(12)   | 101(13)  | 83(11)   | 60(10)   | -36(9)   | -10(10)  |
| C72  | 71(11)   | 105(14)  | 122(16)  | 49(13)   | -12(11)  | -8(10)   |
| C76  | 76(11)   | 171(16)  | 108(13)  | 65(13)   | -8(10)   | 16(12)   |
| C73  | 150(40)  | 80(20)   | 110(40)  | 50(20)   | -10(30)  | -40(20)  |
| O46  | 58(6)    | 141(11)  | 134(11)  | -3(9)    | 5(6)     | -40(7)   |
| N2   | 57(5)    | 57(6)    | 61(6)    | 2(5)     | -10(4)   | -23(5)   |
| C84  | 81(15)   | 100(20)  | 60(8)    | -9(10)   | -4(7)    | -26(13)  |
| C78  | 70(7)    | 90(10)   | 51(7)    | -14(6)   | -7(5)    | -38(7)   |
| C79  | 81(10)   | 117(16)  | 87(11)   | -40(12)  | 13(8)    | -56(12)  |
| C82  | 62(7)    | 70(8)    | 67(7)    | -16(6)   | -17(5)   | -28(6)   |
| C80  | 91(11)   | 127(15)  | 89(11)   | -45(10)  | 22(9)    | -57(11)  |
| C81  | 95(14)   | 100(30)  | 81(19)   | -50(20)  | 13(13)   | -43(16)  |
| C83  | 57(6)    | 87(12)   | 79(10)   | 3(10)    | -15(5)   | -27(8)   |
| C77  | 52(4)    | 49(11)   | 50(4)    | 1(8)     | -14(3)   | -12(7)   |
| C91  | 74(10)   | 76(10)   | 105(12)  | 24(10)   | -5(10)   | -26(9)   |
| C96  | 101(14)  | 82(11)   | 131(14)  | 11(10)   | -43(11)  | -41(10)  |

| Atom | $U_{11}$ | $U_{22}$ | $U_{33}$ | $U_{23}$ | $U_{13}$ | $U_{12}$ |
|------|----------|----------|----------|----------|----------|----------|
| C95  | 125(16)  | 108(13)  | 146(15)  | 8(11)    | -62(13)  | -27(11)  |
| C94  | 132(16)  | 129(16)  | 142(16)  | 29(13)   | -62(13)  | -14(13)  |
| C93  | 121(15)  | 122(17)  | 150(17)  | 20(15)   | -22(14)  | 3(14)    |
| C92  | 88(12)   | 97(13)   | 127(14)  | 58(11)   | -4(11)   | 2(10)    |
| O7   | 28(8)    | 23(7)    | 37(8)    | 9(6)     | -9(6)    | -5(6)    |
| O2   | 47(10)   | 30(8)    | 21(7)    | -1(6)    | -10(7)   | -3(7)    |
| O5   | 23(8)    | 29(8)    | 49(10)   | 1(7)     | -6(7)    | -4(6)    |
| O4   | 42(9)    | 35(9)    | 25(8)    | 1(6)     | -3(7)    | -13(7)   |

**Table 12:** Bond Lengths in Å for **compound3**.

| Atom | Atom | Length/Å  | Atom | Atom | Length/Å  |
|------|------|-----------|------|------|-----------|
| Mo11 | O26  | 1.858(3)  | Mo4  | O24  | 1.845(4)  |
| Mo11 | O27  | 1.975(3)  | Mo4  | O14  | 1.970(4)  |
| Mo11 | O25  | 1.992(3)  | Mo4  | O6   | 2.465(3)  |
| Mo11 | O29  | 1.825(4)  | Mo4  | O13  | 1.840(4)  |
| Mo11 | O6   | 2.473(3)  | Mo4  | O36  | 1.660(3)  |
| Mo11 | O43  | 1.660(3)  | Mo4  | O2   | 2.380(15) |
| Mo11 | O7   | 2.373(14) | Mo6  | O29  | 1.971(4)  |
| Mo8  | O20  | 1.835(3)  | Mo6  | O28  | 1.824(4)  |
| Mo8  | O32  | 1.845(3)  | Mo6  | O16  | 1.970(4)  |
| Mo8  | O19  | 1.972(3)  | Mo6  | O17  | 1.861(4)  |
| Mo8  | O8   | 2.433(3)  | Mo6  | O38  | 1.670(3)  |
| Mo8  | O31  | 1.995(4)  | Mo6  | O3   | 2.444(3)  |
| Mo8  | O40  | 1.673(4)  | Mo6  | O7   | 2.524(15) |
| Mo8  | O4   | 2.565(15) | Mo2  | O22  | 1.972(4)  |
| Mo7  | O18  | 1.830(3)  | Mo2  | O9   | 1.999(4)  |
| Mo7  | O20  | 1.965(3)  | Mo2  | O21  | 1.811(4)  |
| Mo7  | O17  | 1.980(3)  | Mo2  | O1   | 2.429(4)  |
| Mo7  | O15  | 1.852(3)  | Mo2  | O10  | 1.862(4)  |
| Mo7  | O3   | 2.432(3)  | Mo2  | O34  | 1.662(4)  |
| Mo7  | O39  | 1.670(4)  | Mo2  | O5   | 2.525(15) |
| Mo7  | O4   | 2.535(16) | Mo3  | O35  | 1.661(3)  |
| Mo10 | O24  | 1.997(4)  | Mo3  | O11  | 1.872(4)  |
| Mo10 | O25  | 1.847(3)  | Mo3  | O12  | 1.830(4)  |
| Mo10 | O21  | 1.987(4)  | Mo3  | O1   | 2.460(4)  |
| Mo10 | O23  | 1.830(4)  | Mo3  | O10  | 1.990(4)  |
| Mo10 | O6   | 2.457(4)  | Mo3  | O13  | 1.961(4)  |
| Mo10 | O42  | 1.659(4)  | Mo3  | O2   | 2.569(15) |
| Mo10 | O5   | 2.392(16) | Mo9  | O30  | 1.986(4)  |
| Mo5  | O14  | 1.811(4)  | Mo9  | O22  | 1.822(4)  |
| Mo5  | O16  | 1.852(4)  | Mo9  | O8   | 2.437(4)  |
| Mo5  | O12  | 1.966(4)  | Mo9  | O23  | 1.968(4)  |
| Mo5  | O37  | 1.662(4)  | Mo9  | O31  | 1.870(4)  |
| Mo5  | O15  | 1.997(4)  | Mo9  | O41  | 1.666(4)  |
| Mo5  | O3   | 2.446(3)  | Mo9  | O5   | 2.570(16) |
| Mo5  | O2   | 2.469(17) | P1   | O8   | 1.537(3)  |
| Mo12 | O32  | 2.011(4)  | P1   | O6   | 1.504(3)  |
| Mo12 | O27  | 1.816(4)  | P1   | O1   | 1.539(4)  |
| Mo12 | O30  | 1.856(4)  | P1   | O3   | 1.530(4)  |
| Mo12 | O28  | 1.959(4)  | P1   | O7   | 1.592(14) |
| Mo12 | O8   | 2.444(3)  | P1   | O2   | 1.585(14) |
| Mo12 | O44  | 1.660(3)  | P1   | O5   | 1.536(15) |
| Mo12 | O7   | 2.497(15) | P1   | O4   | 1.421(15) |
| Mo1  | O18  | 1.968(3)  | P4   | C51  | 1.800(5)  |
| Mo1  | O19  | 1.835(3)  | P4   | C57  | 1.794(5)  |
| Mo1  | O11  | 1.987(4)  | P4   | C63  | 1.793(5)  |
| Mo1  | O9   | 1.859(4)  | P4   | C45  | 1.795(6)  |
| Mo1  | O33  | 1.673(3)  | C51  | C56  | 1.378(8)  |
| Mo1  | O1   | 2.423(4)  | C51  | C52  | 1.394(8)  |
| Mo1  | O4   | 2.585(16) | C57  | C58  | 1.395(7)  |
| Mo4  | O26  | 1.982(3)  | C57  | C62  | 1.386(7)  |

| Atom | Atom | Length/Å  | Atom | Atom | Length/Å  |
|------|------|-----------|------|------|-----------|
| C56  | C55  | 1.394(9)  | C31  | C36  | 1.394(7)  |
| C63  | C64  | 1.374(8)  | C25  | C26  | 1.387(8)  |
| C63  | C68  | 1.394(8)  | C25  | C30  | 1.378(9)  |
| C45  | C50  | 1.386(8)  | C102 | C101 | 1.380(8)  |
| C45  | C46  | 1.381(8)  | C40  | C41  | 1.388(8)  |
| C58  | C59  | 1.377(8)  | C42  | C43  | 1.376(10) |
| C65  | C64  | 1.396(8)  | C42  | C41  | 1.372(10) |
| C65  | C66  | 1.362(10) | C38  | C99  | 1.394(9)  |
| C52  | C53  | 1.372(9)  | C32  | C33  | 1.385(8)  |
| C68  | C67  | 1.380(9)  | C26  | C27  | 1.382(9)  |
| C62  | C61  | 1.379(8)  | C101 | C100 | 1.370(10) |
| C66  | C67  | 1.375(10) | C43  | C44  | 1.383(8)  |
| C61  | C60  | 1.364(9)  | C33  | C34  | 1.364(10) |
| C59  | C60  | 1.384(10) | C34  | C35  | 1.367(11) |
| C50  | C49  | 1.386(9)  | C35  | C36  | 1.375(10) |
| C46  | C47  | 1.389(10) | C27  | C28  | 1.346(11) |
| C53  | C54  | 1.372(11) | C100 | C99  | 1.349(11) |
| C55  | C54  | 1.371(11) | C28  | C29  | 1.372(12) |
| C48  | C49  | 1.347(10) | C30  | C29  | 1.384(9)  |
| C48  | C47  | 1.357(11) | O47  | C97  | 1.210(9)  |
| P2   | C19  | 1.794(6)  | N3   | C97  | 1.336(9)  |
| P2   | C13  | 1.786(6)  | N3   | C85  | 1.395(14) |
| P2   | C7   | 1.800(6)  | N3   | C98  | 1.447(9)  |
| P2   | C1   | 1.795(5)  | N3   | C91  | 1.442(12) |
| C19  | C24  | 1.390(8)  | C85  | C90  | 1.354(14) |
| C19  | C20  | 1.390(9)  | C85  | C86  | 1.464(11) |
| C6   | C5   | 1.369(8)  | C90  | C89  | 1.387(15) |
| C6   | C1   | 1.374(7)  | C86  | C87  | 1.386(17) |
| C13  | C14  | 1.378(8)  | C88  | C89  | 1.383(16) |
| C13  | C18  | 1.386(8)  | C88  | C87  | 1.388(16) |
| C7   | C8   | 1.385(8)  | O45  | C75  | 1.25(5)   |
| C7   | C12  | 1.393(9)  | N1   | C69  | 1.42(3)   |
| C5   | C4   | 1.354(10) | N1   | C75  | 1.35(5)   |
| C24  | C23  | 1.389(9)  | N1   | C76  | 1.43(2)   |
| C15  | C14  | 1.377(9)  | C69  | C74  | 1.38(3)   |
| C15  | C16  | 1.358(9)  | C69  | C70  | 1.37(3)   |
| C1   | C2   | 1.402(8)  | C71  | C70  | 1.36(2)   |
| C4   | C3   | 1.371(10) | C71  | C72  | 1.38(2)   |
| C16  | C17  | 1.354(10) | C74  | C73  | 1.40(6)   |
| C8   | C9   | 1.375(10) | C72  | C73  | 1.35(5)   |
| C12  | C11  | 1.366(10) | O46  | C83  | 1.22(2)   |
| C20  | C21  | 1.373(10) | N2   | C84  | 1.44(4)   |
| C23  | C22  | 1.361(11) | N2   | C83  | 1.34(2)   |
| C2   | C3   | 1.378(9)  | N2   | C77  | 1.41(8)   |
| C9   | C10  | 1.355(11) | C78  | C79  | 1.38(2)   |
| C18  | C17  | 1.377(10) | C78  | C77  | 1.39(7)   |
| C10  | C11  | 1.379(10) | C79  | C80  | 1.39(2)   |
| C22  | C21  | 1.365(11) | C82  | C81  | 1.40(5)   |
| P3   | C37  | 1.793(5)  | C82  | C77  | 1.37(7)   |
| P3   | C39  | 1.793(5)  | C80  | C81  | 1.34(5)   |
| P3   | C31  | 1.793(5)  | C91  | C96  | 1.3900    |
| P3   | C25  | 1.800(5)  | C91  | C92  | 1.3900    |
| C37  | C102 | 1.395(8)  | C96  | C95  | 1.3900    |
| C37  | C38  | 1.374(8)  | C95  | C94  | 1.3900    |
| C39  | C40  | 1.380(7)  | C94  | C93  | 1.3900    |
| C39  | C44  | 1.399(7)  | C93  | C92  | 1.3900    |
| C31  | C32  | 1.388(8)  |      |      |           |

**Table 13:** Bond Angles in ° for **compound3**.

| Atom | Atom | Atom | Angle/°    |
|------|------|------|------------|
| 026  | Mo11 | 027  | 153.62(16) |
| 026  | Mo11 | 025  | 86.29(15)  |
| 026  | Mo11 | 06   | 71.36(13)  |
| 026  | Mo11 | 07   | 102.4(4)   |
| 027  | Mo11 | 025  | 81.87(15)  |
| 027  | Mo11 | 06   | 82.40(14)  |
| 027  | Mo11 | 07   | 56.3(4)    |
| 025  | Mo11 | 06   | 69.40(13)  |
| 025  | Mo11 | 07   | 97.2(4)    |
| 029  | Mo11 | 026  | 94.51(16)  |
| 029  | Mo11 | 027  | 86.23(15)  |
| 029  | Mo11 | 025  | 153.98(16) |
| 029  | Mo11 | 06   | 86.18(15)  |
| 029  | Mo11 | 07   | 57.2(4)    |
| 043  | Mo11 | 026  | 102.36(18) |
| 043  | Mo11 | 027  | 102.84(18) |
| 043  | Mo11 | 025  | 99.80(18)  |
| 043  | Mo11 | 029  | 105.39(19) |
| 043  | Mo11 | 06   | 167.46(17) |
| 043  | Mo11 | 07   | 150.7(4)   |
| 020  | Mo8  | 032  | 96.17(16)  |
| 020  | Mo8  | 019  | 85.47(14)  |
| 020  | Mo8  | 08   | 88.70(14)  |
| 020  | Mo8  | 031  | 157.04(16) |
| 020  | Mo8  | 04   | 59.0(4)    |
| 032  | Mo8  | 019  | 155.89(16) |
| 032  | Mo8  | 08   | 72.62(14)  |
| 032  | Mo8  | 031  | 87.00(16)  |
| 032  | Mo8  | 04   | 101.7(4)   |
| 019  | Mo8  | 08   | 83.39(13)  |
| 019  | Mo8  | 031  | 82.64(15)  |
| 019  | Mo8  | 04   | 58.7(4)    |
| 031  | Mo8  | 08   | 70.49(14)  |
| 031  | Mo8  | 04   | 98.1(4)    |
| 040  | Mo8  | 020  | 102.87(19) |
| 040  | Mo8  | 032  | 101.56(19) |
| 040  | Mo8  | 019  | 101.50(18) |
| 040  | Mo8  | 08   | 167.68(17) |
| 040  | Mo8  | 031  | 98.72(19)  |
| 040  | Mo8  | 04   | 151.9(4)   |
| 018  | Mo7  | 020  | 86.30(14)  |
| 018  | Mo7  | 017  | 156.50(16) |
| 018  | Mo7  | 015  | 95.08(16)  |
| 018  | Mo7  | 03   | 87.53(14)  |
| 018  | Mo7  | 04   | 60.2(4)    |
| 020  | Mo7  | 017  | 82.86(14)  |
| 020  | Mo7  | 03   | 84.11(13)  |
| 020  | Mo7  | 04   | 58.6(4)    |
| 017  | Mo7  | 03   | 70.69(14)  |
| 017  | Mo7  | 04   | 96.5(4)    |
| 015  | Mo7  | 020  | 155.96(16) |
| 015  | Mo7  | 017  | 86.69(15)  |
| 015  | Mo7  | 03   | 72.00(14)  |
| 015  | Mo7  | 04   | 101.5(4)   |
| 039  | Mo7  | 018  | 103.25(19) |
| 039  | Mo7  | 020  | 101.85(18) |
| 039  | Mo7  | 017  | 99.36(19)  |
| 039  | Mo7  | 015  | 101.17(19) |
| 039  | Mo7  | 03   | 167.89(17) |
| 039  | Mo7  | 04   | 152.9(4)   |
| 024  | Mo10 | 06   | 69.59(13)  |
| 024  | Mo10 | 05   | 95.7(4)    |
| 025  | Mo10 | 024  | 86.83(15)  |

| Atom | Atom | Atom | Angle/°    |
|------|------|------|------------|
| 025  | Mo10 | 021  | 154.32(16) |
| 025  | Mo10 | 06   | 71.82(14)  |
| 025  | Mo10 | 05   | 102.5(4)   |
| 021  | Mo10 | 024  | 81.67(15)  |
| 021  | Mo10 | 06   | 82.65(14)  |
| 021  | Mo10 | 05   | 56.4(4)    |
| 023  | Mo10 | 024  | 154.12(17) |
| 023  | Mo10 | 025  | 95.60(16)  |
| 023  | Mo10 | 021  | 85.35(15)  |
| 023  | Mo10 | 06   | 86.65(15)  |
| 023  | Mo10 | 05   | 58.5(4)    |
| 042  | Mo10 | 024  | 99.79(19)  |
| 042  | Mo10 | 025  | 103.02(19) |
| 042  | Mo10 | 021  | 101.52(19) |
| 042  | Mo10 | 023  | 104.7(2)   |
| 042  | Mo10 | 06   | 168.11(18) |
| 042  | Mo10 | 05   | 150.7(4)   |
| 014  | Mo5  | 016  | 95.24(17)  |
| 014  | Mo5  | 012  | 86.62(15)  |
| 014  | Mo5  | 015  | 155.17(17) |
| 014  | Mo5  | 03   | 87.19(15)  |
| 014  | Mo5  | 02   | 53.8(4)    |
| 016  | Mo5  | 012  | 155.32(16) |
| 016  | Mo5  | 015  | 85.98(15)  |
| 016  | Mo5  | 03   | 71.84(14)  |
| 016  | Mo5  | 02   | 102.6(4)   |
| 012  | Mo5  | 015  | 82.36(15)  |
| 012  | Mo5  | 03   | 83.70(14)  |
| 012  | Mo5  | 02   | 59.0(4)    |
| 037  | Mo5  | 014  | 104.01(19) |
| 037  | Mo5  | 016  | 101.2(2)   |
| 037  | Mo5  | 012  | 102.20(19) |
| 037  | Mo5  | 015  | 100.04(18) |
| 037  | Mo5  | 03   | 167.51(17) |
| 037  | Mo5  | 02   | 148.7(4)   |
| 015  | Mo5  | 03   | 69.58(13)  |
| 015  | Mo5  | 02   | 101.6(4)   |
| 032  | Mo12 | 08   | 69.92(13)  |
| 032  | Mo12 | 07   | 101.8(4)   |
| 027  | Mo12 | 032  | 156.49(16) |
| 027  | Mo12 | 030  | 95.52(17)  |
| 027  | Mo12 | 028  | 86.78(15)  |
| 027  | Mo12 | 08   | 88.27(15)  |
| 027  | Mo12 | 07   | 55.0(4)    |
| 030  | Mo12 | 032  | 86.20(16)  |
| 030  | Mo12 | 028  | 154.50(16) |
| 030  | Mo12 | 08   | 71.94(14)  |
| 030  | Mo12 | 07   | 104.0(4)   |
| 028  | Mo12 | 032  | 81.99(15)  |
| 028  | Mo12 | 08   | 82.78(14)  |
| 028  | Mo12 | 07   | 57.1(4)    |
| 044  | Mo12 | 032  | 97.67(17)  |
| 044  | Mo12 | 027  | 104.92(18) |
| 044  | Mo12 | 030  | 101.39(19) |
| 044  | Mo12 | 028  | 102.52(19) |
| 044  | Mo12 | 08   | 165.93(15) |
| 044  | Mo12 | 07   | 148.8(3)   |
| 018  | Mo1  | 011  | 82.85(15)  |
| 018  | Mo1  | 01   | 84.43(14)  |
| 018  | Mo1  | 04   | 58.0(4)    |
| 019  | Mo1  | 018  | 86.01(15)  |
| 019  | Mo1  | 011  | 157.01(16) |
| 019  | Mo1  | 09   | 95.84(17)  |

| Atom | Atom | Atom | Angle/°    |
|------|------|------|------------|
| 019  | Mo1  | O1   | 88.13(14)  |
| 019  | Mo1  | O4   | 59.4(3)    |
| 011  | Mo1  | O1   | 70.85(14)  |
| 011  | Mo1  | O4   | 97.8(4)    |
| 09   | Mo1  | O18  | 156.69(16) |
| 09   | Mo1  | O11  | 86.80(16)  |
| 09   | Mo1  | O1   | 72.43(15)  |
| 09   | Mo1  | O4   | 103.2(4)   |
| 033  | Mo1  | O18  | 100.81(17) |
| 033  | Mo1  | O19  | 103.52(18) |
| 033  | Mo1  | O11  | 98.30(18)  |
| 033  | Mo1  | O9   | 101.33(19) |
| 033  | Mo1  | O1   | 167.45(16) |
| 033  | Mo1  | O4   | 151.3(4)   |
| 026  | Mo4  | O6   | 69.80(13)  |
| 026  | Mo4  | O2   | 96.4(4)    |
| 024  | Mo4  | O26  | 87.46(15)  |
| 024  | Mo4  | O14  | 153.45(16) |
| 024  | Mo4  | O6   | 71.57(14)  |
| 024  | Mo4  | O2   | 103.3(4)   |
| 014  | Mo4  | O26  | 81.72(15)  |
| 014  | Mo4  | O6   | 81.94(14)  |
| 014  | Mo4  | O2   | 54.5(4)    |
| 013  | Mo4  | O26  | 154.81(16) |
| 013  | Mo4  | O24  | 94.48(17)  |
| 013  | Mo4  | O14  | 85.60(16)  |
| 013  | Mo4  | O6   | 86.96(15)  |
| 013  | Mo4  | O2   | 58.7(4)    |
| 036  | Mo4  | O26  | 98.99(17)  |
| 036  | Mo4  | O24  | 102.70(19) |
| 036  | Mo4  | O14  | 102.89(19) |
| 036  | Mo4  | O6   | 167.27(17) |
| 036  | Mo4  | O13  | 105.03(19) |
| 036  | Mo4  | O2   | 150.3(4)   |
| 029  | Mo6  | O3   | 83.47(14)  |
| 029  | Mo6  | O7   | 53.0(3)    |
| 028  | Mo6  | O29  | 85.50(15)  |
| 028  | Mo6  | O16  | 154.92(16) |
| 028  | Mo6  | O17  | 95.36(16)  |
| 028  | Mo6  | O3   | 86.69(15)  |
| 028  | Mo6  | O7   | 57.5(4)    |
| 016  | Mo6  | O29  | 82.42(16)  |
| 016  | Mo6  | O3   | 70.18(13)  |
| 016  | Mo6  | O7   | 97.9(4)    |
| 017  | Mo6  | O29  | 155.52(16) |
| 017  | Mo6  | O16  | 86.90(15)  |
| 017  | Mo6  | O3   | 72.18(14)  |
| 017  | Mo6  | O7   | 107.4(3)   |
| 038  | Mo6  | O29  | 101.13(17) |
| 038  | Mo6  | O28  | 105.33(18) |
| 038  | Mo6  | O16  | 98.54(17)  |
| 038  | Mo6  | O17  | 102.20(17) |
| 038  | Mo6  | O3   | 167.34(15) |
| 038  | Mo6  | O7   | 146.8(3)   |
| 022  | Mo2  | O9   | 82.24(16)  |
| 022  | Mo2  | O1   | 83.18(15)  |
| 022  | Mo2  | O5   | 58.5(4)    |
| 09   | Mo2  | O1   | 70.20(14)  |
| 09   | Mo2  | O5   | 101.6(4)   |
| 021  | Mo2  | O22  | 86.03(15)  |
| 021  | Mo2  | O9   | 156.46(17) |
| 021  | Mo2  | O1   | 88.24(15)  |
| 021  | Mo2  | O10  | 96.56(17)  |

| Atom | Atom | Atom | Angle/°    |
|------|------|------|------------|
| 021  | Mo2  | O5   | 55.0(4)    |
| 010  | Mo2  | O22  | 155.33(17) |
| 010  | Mo2  | O9   | 86.07(17)  |
| 010  | Mo2  | O1   | 72.41(15)  |
| 010  | Mo2  | O5   | 103.2(4)   |
| 034  | Mo2  | O22  | 102.63(19) |
| 034  | Mo2  | O9   | 98.25(18)  |
| 034  | Mo2  | O21  | 104.21(19) |
| 034  | Mo2  | O1   | 166.48(17) |
| 034  | Mo2  | O10  | 100.5(2)   |
| 034  | Mo2  | O5   | 149.9(4)   |
| 035  | Mo3  | O11  | 101.88(17) |
| 035  | Mo3  | O12  | 104.49(19) |
| 035  | Mo3  | O1   | 166.91(16) |
| 035  | Mo3  | O10  | 98.74(19)  |
| 035  | Mo3  | O13  | 101.92(18) |
| 035  | Mo3  | O2   | 147.7(3)   |
| 011  | Mo3  | O1   | 71.69(14)  |
| 011  | Mo3  | O10  | 85.92(17)  |
| 011  | Mo3  | O13  | 154.95(17) |
| 011  | Mo3  | O2   | 106.3(3)   |
| 012  | Mo3  | O11  | 94.98(17)  |
| 012  | Mo3  | O1   | 87.65(15)  |
| 012  | Mo3  | O10  | 156.01(17) |
| 012  | Mo3  | O13  | 86.55(16)  |
| 012  | Mo3  | O2   | 58.0(4)    |
| 010  | Mo3  | O1   | 69.83(14)  |
| 010  | Mo3  | O2   | 98.7(4)    |
| 013  | Mo3  | O1   | 83.42(15)  |
| 013  | Mo3  | O10  | 82.85(17)  |
| 013  | Mo3  | O2   | 53.8(4)    |
| 030  | Mo9  | O8   | 70.20(13)  |
| 030  | Mo9  | O5   | 97.4(4)    |
| 022  | Mo9  | O30  | 155.57(16) |
| 022  | Mo9  | O8   | 87.13(15)  |
| 022  | Mo9  | O23  | 86.26(15)  |
| 022  | Mo9  | O31  | 95.31(17)  |
| 022  | Mo9  | O5   | 58.7(4)    |
| 023  | Mo9  | O30  | 82.33(16)  |
| 023  | Mo9  | O8   | 83.43(14)  |
| 023  | Mo9  | O5   | 53.8(4)    |
| 031  | Mo9  | O30  | 86.54(16)  |
| 031  | Mo9  | O8   | 72.25(14)  |
| 031  | Mo9  | O23  | 155.49(17) |
| 031  | Mo9  | O5   | 106.6(4)   |
| 041  | Mo9  | O30  | 98.94(18)  |
| 041  | Mo9  | O22  | 104.47(19) |
| 041  | Mo9  | O8   | 167.60(17) |
| 041  | Mo9  | O23  | 101.43(19) |
| 041  | Mo9  | O31  | 101.83(19) |
| 041  | Mo9  | O5   | 147.8(4)   |
| 08   | P1   | O1   | 108.4(2)   |
| 06   | P1   | O8   | 110.2(2)   |
| 06   | P1   | O1   | 110.1(2)   |
| 06   | P1   | O3   | 110.9(2)   |
| 03   | P1   | O8   | 108.7(2)   |
| 03   | P1   | O1   | 108.4(2)   |
| 02   | P1   | O7   | 103.7(8)   |
| 05   | P1   | O7   | 105.2(8)   |
| 05   | P1   | O2   | 105.8(9)   |
| 04   | P1   | O7   | 112.0(9)   |
| 04   | P1   | O2   | 113.2(9)   |
| 04   | P1   | O5   | 115.8(9)   |

| Atom | Atom | Atom | Angle/°    |
|------|------|------|------------|
| Mo11 | O26  | Mo4  | 129.35(18) |
| Mo7  | O18  | Mo1  | 148.5(2)   |
| Mo8  | O20  | Mo7  | 148.8(2)   |
| Mo8  | O32  | Mo12 | 127.2(2)   |
| Mo12 | O27  | Mo11 | 149.2(2)   |
| Mo4  | O24  | Mo10 | 129.01(19) |
| Mo10 | O25  | Mo11 | 129.26(19) |
| Mo12 | O30  | Mo9  | 127.8(2)   |
| Mo9  | O22  | Mo2  | 149.4(2)   |
| Mo11 | O29  | Mo6  | 150.6(2)   |
| Mo1  | O19  | Mo8  | 149.16(19) |
| Mo6  | O28  | Mo12 | 150.4(2)   |
| Mo5  | O14  | Mo4  | 150.9(2)   |
| Mo5  | O16  | Mo6  | 128.45(19) |
| Mo8  | O8   | Mo12 | 90.21(11)  |
| Mo8  | O8   | Mo9  | 90.40(11)  |
| Mo9  | O8   | Mo12 | 90.01(12)  |
| P1   | O8   | Mo8  | 126.2(2)   |
| P1   | O8   | Mo12 | 124.04(19) |
| P1   | O8   | Mo9  | 125.0(2)   |
| Mo6  | O17  | Mo7  | 127.3(2)   |
| Mo3  | O11  | Mo1  | 127.2(2)   |
| Mo1  | O9   | Mo2  | 126.7(2)   |
| Mo2  | O21  | Mo10 | 150.0(2)   |
| Mo10 | O23  | Mo9  | 150.2(2)   |
| Mo10 | O6   | Mo11 | 89.47(11)  |
| Mo10 | O6   | Mo4  | 89.64(11)  |
| Mo4  | O6   | Mo11 | 89.38(11)  |
| P1   | O6   | Mo11 | 125.5(2)   |
| P1   | O6   | Mo10 | 125.9(2)   |
| P1   | O6   | Mo4  | 125.5(2)   |
| Mo3  | O12  | Mo5  | 148.6(2)   |
| Mo9  | O31  | Mo8  | 126.8(2)   |
| Mo1  | O1   | Mo2  | 90.61(12)  |
| Mo1  | O1   | Mo3  | 90.18(12)  |
| Mo2  | O1   | Mo3  | 90.02(11)  |
| P1   | O1   | Mo1  | 125.88(19) |
| P1   | O1   | Mo2  | 124.8(2)   |
| P1   | O1   | Mo3  | 124.5(2)   |
| Mo2  | O10  | Mo3  | 127.7(2)   |
| Mo7  | O15  | Mo5  | 128.0(2)   |
| Mo4  | O13  | Mo3  | 149.9(2)   |
| Mo7  | O3   | Mo5  | 90.35(12)  |
| Mo7  | O3   | Mo6  | 89.80(11)  |
| Mo6  | O3   | Mo5  | 89.49(11)  |
| P1   | O3   | Mo7  | 126.97(19) |
| P1   | O3   | Mo5  | 124.43(19) |
| P1   | O3   | Mo6  | 124.61(19) |
| C57  | P4   | C51  | 111.2(3)   |
| C57  | P4   | C45  | 109.3(3)   |
| C63  | P4   | C51  | 108.5(3)   |
| C63  | P4   | C57  | 107.3(2)   |
| C63  | P4   | C45  | 111.2(3)   |
| C45  | P4   | C51  | 109.3(3)   |
| C56  | C51  | P4   | 121.1(4)   |
| C56  | C51  | C52  | 120.3(5)   |
| C52  | C51  | P4   | 118.5(4)   |
| C58  | C57  | P4   | 120.7(4)   |
| C62  | C57  | P4   | 119.7(4)   |
| C62  | C57  | C58  | 119.5(5)   |
| C51  | C56  | C55  | 119.3(6)   |
| C64  | C63  | P4   | 119.6(4)   |
| C64  | C63  | C68  | 120.4(5)   |

| Atom | Atom | Atom | Angle/°  |
|------|------|------|----------|
| C68  | C63  | P4   | 119.4(4) |
| C50  | C45  | P4   | 121.0(4) |
| C46  | C45  | P4   | 120.0(5) |
| C46  | C45  | C50  | 119.0(6) |
| C59  | C58  | C57  | 119.6(6) |
| C66  | C65  | C64  | 120.2(6) |
| C63  | C64  | C65  | 119.2(6) |
| C53  | C52  | C51  | 119.5(7) |
| C67  | C68  | C63  | 119.4(6) |
| C61  | C62  | C57  | 120.2(5) |
| C65  | C66  | C67  | 120.7(6) |
| C60  | C61  | C62  | 119.9(6) |
| C58  | C59  | C60  | 120.0(6) |
| C49  | C50  | C45  | 120.0(6) |
| C66  | C67  | C68  | 120.0(7) |
| C45  | C46  | C47  | 119.7(7) |
| C52  | C53  | C54  | 120.4(7) |
| C54  | C55  | C56  | 120.0(7) |
| C55  | C54  | C53  | 120.5(7) |
| C49  | C48  | C47  | 121.0(7) |
| C48  | C49  | C50  | 120.1(7) |
| C61  | C60  | C59  | 120.7(6) |
| C48  | C47  | C46  | 120.2(7) |
| C19  | P2   | C7   | 111.5(3) |
| C19  | P2   | C1   | 109.4(3) |
| C13  | P2   | C19  | 107.5(3) |
| C13  | P2   | C7   | 111.4(3) |
| C13  | P2   | C1   | 111.3(3) |
| C1   | P2   | C7   | 105.8(3) |
| C24  | C19  | P2   | 120.8(5) |
| C20  | C19  | P2   | 120.3(5) |
| C20  | C19  | C24  | 118.8(6) |
| C5   | C6   | C1   | 120.0(6) |
| C14  | C13  | P2   | 122.5(5) |
| C14  | C13  | C18  | 118.5(6) |
| C18  | C13  | P2   | 119.0(5) |
| C8   | C7   | P2   | 121.9(5) |
| C8   | C7   | C12  | 118.9(6) |
| C12  | C7   | P2   | 119.2(5) |
| C4   | C5   | C6   | 121.2(6) |
| C23  | C24  | C19  | 119.7(6) |
| C16  | C15  | C14  | 120.8(6) |
| C6   | C1   | P2   | 121.1(4) |
| C6   | C1   | C2   | 119.5(5) |
| C2   | C1   | P2   | 119.3(4) |
| C5   | C4   | C3   | 119.4(6) |
| C15  | C14  | C13  | 119.9(6) |
| C17  | C16  | C15  | 120.2(7) |
| C9   | C8   | C7   | 119.6(7) |
| C11  | C12  | C7   | 120.3(6) |
| C21  | C20  | C19  | 120.6(7) |
| C22  | C23  | C24  | 120.1(7) |
| C3   | C2   | C1   | 118.5(6) |
| C10  | C9   | C8   | 121.3(7) |
| C4   | C3   | C2   | 121.2(7) |
| C17  | C18  | C13  | 120.6(7) |
| C9   | C10  | C11  | 119.7(7) |
| C23  | C22  | C21  | 120.8(7) |
| C12  | C11  | C10  | 120.2(8) |
| C16  | C17  | C18  | 120.0(7) |
| C22  | C21  | C20  | 119.9(8) |
| C37  | P3   | C31  | 109.2(2) |
| C37  | P3   | C25  | 108.9(2) |



| Atom | Atom | Atom | Angle/°   | Atom | Atom | Atom | Angle/°   |
|------|------|------|-----------|------|------|------|-----------|
| C39  | P3   | C37  | 109.2(2)  | C74  | C69  | N1   | 119(2)    |
| C39  | P3   | C31  | 109.1(2)  | C70  | C69  | N1   | 120(2)    |
| C39  | P3   | C25  | 109.6(3)  | C70  | C69  | C74  | 121(2)    |
| C31  | P3   | C25  | 110.6(2)  | C70  | C71  | C72  | 119.9(15) |
| C102 | C37  | P3   | 119.8(4)  | O45  | C75  | N1   | 120(3)    |
| C38  | C37  | P3   | 119.9(4)  | C69  | C74  | C73  | 116(3)    |
| C38  | C37  | C102 | 120.1(5)  | C71  | C70  | C69  | 121.0(17) |
| C40  | C39  | P3   | 119.5(4)  | C73  | C72  | C71  | 119(3)    |
| C40  | C39  | C44  | 119.8(5)  | C72  | C73  | C74  | 123(4)    |
| C44  | C39  | P3   | 120.7(4)  | C83  | N2   | C84  | 118(2)    |
| C32  | C31  | P3   | 120.4(4)  | C83  | N2   | C77  | 122(3)    |
| C32  | C31  | C36  | 119.7(5)  | C77  | N2   | C84  | 120(4)    |
| C36  | C31  | P3   | 119.9(5)  | C79  | C78  | C77  | 119(3)    |
| C26  | C25  | P3   | 119.6(5)  | C78  | C79  | C80  | 120.5(17) |
| C30  | C25  | P3   | 121.0(5)  | C77  | C82  | C81  | 121(3)    |
| C30  | C25  | C26  | 119.4(6)  | C81  | C80  | C79  | 121(2)    |
| C101 | C102 | C37  | 119.8(6)  | C80  | C81  | C82  | 119(3)    |
| C39  | C40  | C41  | 119.7(6)  | O46  | C83  | N2   | 125.1(19) |
| C41  | C42  | C43  | 120.7(6)  | C78  | C77  | N2   | 118(5)    |
| C37  | C38  | C99  | 118.6(6)  | C82  | C77  | N2   | 122(5)    |
| C33  | C32  | C31  | 119.1(6)  | C82  | C77  | C78  | 120(5)    |
| C27  | C26  | C25  | 119.2(7)  | C96  | C91  | N3   | 118.5(10) |
| C100 | C101 | C102 | 119.4(6)  | C96  | C91  | C92  | 120.0     |
| C42  | C43  | C44  | 119.8(6)  | C92  | C91  | N3   | 121.5(10) |
| C43  | C44  | C39  | 119.9(6)  | C95  | C96  | C91  | 120.0     |
| C42  | C41  | C40  | 120.2(6)  | C96  | C95  | C94  | 120.0     |
| C34  | C33  | C32  | 120.5(7)  | C93  | C94  | C95  | 120.0     |
| C33  | C34  | C35  | 120.8(7)  | C94  | C93  | C92  | 120.0     |
| C34  | C35  | C36  | 120.0(7)  | C93  | C92  | C91  | 120.0     |
| C28  | C27  | C26  | 120.9(7)  | Mo11 | O7   | Mo12 | 97.2(5)   |
| C99  | C100 | C101 | 120.9(6)  | Mo11 | O7   | Mo6  | 97.1(5)   |
| C27  | C28  | C29  | 120.9(7)  | Mo12 | O7   | Mo6  | 93.5(5)   |
| C100 | C99  | C38  | 121.0(7)  | P1   | O7   | Mo11 | 126.8(9)  |
| C35  | C36  | C31  | 119.9(7)  | P1   | O7   | Mo12 | 118.3(7)  |
| C25  | C30  | C29  | 120.5(7)  | P1   | O7   | Mo6  | 117.1(7)  |
| C28  | C29  | C30  | 119.1(8)  | Mo5  | O2   | Mo3  | 93.0(5)   |
| C97  | N3   | C85  | 120.9(11) | Mo4  | O2   | Mo5  | 98.0(5)   |
| C97  | N3   | C98  | 120.4(8)  | Mo4  | O2   | Mo3  | 95.7(5)   |
| C97  | N3   | C91  | 118.8(10) | P1   | O2   | Mo5  | 120.3(8)  |
| C85  | N3   | C98  | 118.6(11) | P1   | O2   | Mo4  | 126.3(9)  |
| C91  | N3   | C98  | 120.7(10) | P1   | O2   | Mo3  | 116.3(7)  |
| O47  | C97  | N3   | 125.0(8)  | Mo10 | O5   | Mo2  | 96.5(6)   |
| N3   | C85  | C86  | 113.4(14) | Mo10 | O5   | Mo9  | 95.3(5)   |
| C90  | C85  | N3   | 120.9(13) | Mo2  | O5   | Mo9  | 91.8(5)   |
| C90  | C85  | C86  | 125.6(13) | P1   | O5   | Mo10 | 128.3(9)  |
| C85  | C90  | C89  | 118.6(15) | P1   | O5   | Mo2  | 119.4(8)  |
| C87  | C86  | C85  | 111.1(15) | P1   | O5   | Mo9  | 117.4(9)  |
| C89  | C88  | C87  | 121.9(17) | Mo8  | O4   | Mo1  | 90.9(5)   |
| C88  | C89  | C90  | 118.0(15) | Mo7  | O4   | Mo8  | 91.7(5)   |
| C86  | C87  | C88  | 122.1(18) | Mo7  | O4   | Mo1  | 91.1(5)   |
| C69  | N1   | C76  | 117.1(16) | P1   | O4   | Mo8  | 124.3(9)  |
| C75  | N1   | C69  | 122(2)    | P1   | O4   | Mo7  | 126.6(9)  |
| C75  | N1   | C76  | 121(2)    | P1   | O4   | Mo1  | 122.2(9)  |

**Table 14:** Torsion Angles in ° for **compound3**.

| Atom | Atom | Atom | Atom | Angle/°  |
|------|------|------|------|----------|
| O26  | Mo11 | O29  | Mo6  | 121.8(5) |
| O26  | Mo4  | O24  | Mo10 | 65.2(2)  |
| O26  | Mo4  | O13  | Mo3  | 27.8(8)  |
| O18  | Mo7  | O15  | Mo5  | -88.3(2) |
| O18  | Mo1  | O19  | Mo8  | -36.8(4) |

| Atom | Atom | Atom | Atom | Angle/°   |
|------|------|------|------|-----------|
| 018  | Mo1  | 09   | Mo2  | 5.0(6)    |
| 020  | Mo8  | 032  | Mo12 | -88.8(3)  |
| 020  | Mo7  | 018  | Mo1  | -36.2(4)  |
| 020  | Mo7  | 015  | Mo5  | 4.0(5)    |
| 032  | Mo8  | 020  | Mo7  | 118.2(4)  |
| 032  | Mo12 | 027  | Mo11 | 30.0(7)   |
| 032  | Mo12 | 030  | Mo9  | 68.7(3)   |
| 027  | Mo11 | 026  | Mo4  | 2.9(5)    |
| 027  | Mo11 | 029  | Mo6  | -31.7(5)  |
| 027  | Mo12 | 030  | Mo9  | -87.7(3)  |
| 024  | Mo10 | 025  | Mo11 | 67.2(2)   |
| 024  | Mo10 | 023  | Mo9  | 27.0(7)   |
| 024  | Mo4  | 013  | Mo3  | 121.4(5)  |
| 025  | Mo11 | 026  | Mo4  | 66.2(2)   |
| 025  | Mo11 | 029  | Mo6  | 31.0(7)   |
| 025  | Mo10 | 023  | Mo9  | 121.3(5)  |
| 030  | Mo12 | 027  | Mo11 | 123.2(4)  |
| 030  | Mo9  | 022  | Mo2  | 29.2(8)   |
| 030  | Mo9  | 031  | Mo8  | 67.7(3)   |
| 022  | Mo2  | 021  | Mo10 | -34.8(5)  |
| 022  | Mo2  | 010  | Mo3  | 7.9(6)    |
| 022  | Mo9  | 031  | Mo8  | -87.9(3)  |
| 029  | Mo11 | 026  | Mo4  | -87.7(3)  |
| 029  | Mo6  | 028  | Mo12 | -32.1(5)  |
| 029  | Mo6  | 017  | Mo7  | 3.4(5)    |
| 035  | Mo3  | 011  | Mo1  | 166.2(3)  |
| 035  | Mo3  | 012  | Mo5  | -135.0(4) |
| 019  | Mo8  | 020  | Mo7  | -37.7(4)  |
| 019  | Mo8  | 032  | Mo12 | 3.9(5)    |
| 019  | Mo1  | 09   | Mo2  | -88.5(3)  |
| 028  | Mo12 | 027  | Mo11 | -31.3(4)  |
| 028  | Mo12 | 030  | Mo9  | 6.4(6)    |
| 028  | Mo6  | 017  | Mo7  | -87.5(2)  |
| 014  | Mo5  | 016  | Mo6  | -87.1(3)  |
| 014  | Mo4  | 024  | Mo10 | -0.5(5)   |
| 014  | Mo4  | 013  | Mo3  | -32.0(5)  |
| 016  | Mo5  | 014  | Mo4  | 123.9(4)  |
| 016  | Mo6  | 028  | Mo12 | 29.2(7)   |
| 016  | Mo6  | 017  | Mo7  | 67.4(2)   |
| 08   | Mo8  | 020  | Mo7  | 45.8(4)   |
| 08   | Mo8  | 032  | Mo12 | -2.1(2)   |
| 08   | Mo12 | 027  | Mo11 | 51.5(4)   |
| 08   | Mo12 | 030  | Mo9  | -1.4(2)   |
| 08   | Mo9  | 022  | Mo2  | 50.7(5)   |
| 08   | Mo9  | 031  | Mo8  | -2.6(2)   |
| 08   | P1   | 06   | Mo11 | -65.1(3)  |
| 08   | P1   | 06   | Mo10 | 55.0(3)   |
| 08   | P1   | 06   | Mo4  | 175.5(2)  |
| 08   | P1   | 01   | Mo1  | 55.0(3)   |
| 08   | P1   | 01   | Mo2  | -66.2(3)  |
| 08   | P1   | 01   | Mo3  | 175.2(2)  |
| 08   | P1   | 03   | Mo7  | -62.9(3)  |
| 08   | P1   | 03   | Mo5  | 175.4(2)  |
| 08   | P1   | 03   | Mo6  | 58.0(3)   |
| 017  | Mo7  | 018  | Mo1  | 26.3(7)   |
| 017  | Mo7  | 015  | Mo5  | 68.2(2)   |
| 017  | Mo6  | 028  | Mo12 | 123.3(5)  |
| 011  | Mo1  | 019  | Mo8  | 24.3(7)   |
| 011  | Mo1  | 09   | Mo2  | 68.6(3)   |
| 011  | Mo3  | 012  | Mo5  | 121.3(4)  |
| 09   | Mo1  | 019  | Mo8  | 119.9(4)  |
| 09   | Mo2  | 021  | Mo10 | 25.4(8)   |
| 09   | Mo2  | 010  | Mo3  | 69.6(3)   |

| Atom | Atom | Atom | Atom | Angle/°   |
|------|------|------|------|-----------|
| 021  | Mo10 | 025  | Mo11 | 3.9(5)    |
| 021  | Mo10 | 023  | Mo9  | -32.9(5)  |
| 021  | Mo2  | 010  | Mo3  | -86.9(3)  |
| 038  | Mo6  | 028  | Mo12 | -132.4(5) |
| 038  | Mo6  | 017  | Mo7  | 165.5(2)  |
| 023  | Mo10 | 025  | Mo11 | -87.0(3)  |
| 023  | Mo9  | 022  | Mo2  | -32.9(5)  |
| 023  | Mo9  | 031  | Mo8  | 4.8(6)    |
| 033  | Mo1  | 019  | Mo8  | -136.9(4) |
| 033  | Mo1  | 09   | Mo2  | 166.4(3)  |
| 06   | Mo11 | 026  | Mo4  | -3.3(2)   |
| 06   | Mo11 | 029  | Mo6  | 50.9(5)   |
| 06   | Mo10 | 025  | Mo11 | -2.4(2)   |
| 06   | Mo10 | 023  | Mo9  | 50.0(5)   |
| 06   | Mo4  | 024  | Mo10 | -4.4(2)   |
| 06   | Mo4  | 013  | Mo3  | 50.2(5)   |
| 06   | P1   | 08   | Mo8  | 174.9(2)  |
| 06   | P1   | 08   | Mo12 | 54.9(3)   |
| 06   | P1   | 08   | Mo9  | -63.4(3)  |
| 06   | P1   | 01   | Mo1  | 175.7(2)  |
| 06   | P1   | 01   | Mo2  | 54.4(3)   |
| 06   | P1   | 01   | Mo3  | -64.1(3)  |
| 06   | P1   | 03   | Mo7  | 175.8(2)  |
| 06   | P1   | 03   | Mo5  | 54.1(3)   |
| 06   | P1   | 03   | Mo6  | -63.3(3)  |
| 012  | Mo5  | 014  | Mo4  | -31.5(5)  |
| 012  | Mo5  | 016  | Mo6  | 6.2(6)    |
| 012  | Mo3  | 011  | Mo1  | -87.8(3)  |
| 031  | Mo8  | 020  | Mo7  | 21.3(7)   |
| 031  | Mo8  | 032  | Mo12 | 68.4(3)   |
| 031  | Mo9  | 022  | Mo2  | 122.6(5)  |
| 037  | Mo5  | 014  | Mo4  | -133.2(5) |
| 037  | Mo5  | 016  | Mo6  | 167.5(3)  |
| 01   | Mo1  | 019  | Mo8  | 47.8(4)   |
| 01   | Mo1  | 09   | Mo2  | -2.3(2)   |
| 01   | Mo2  | 021  | Mo10 | 48.5(5)   |
| 01   | Mo2  | 010  | Mo3  | -0.8(2)   |
| 01   | Mo3  | 011  | Mo1  | -1.9(2)   |
| 01   | Mo3  | 012  | Mo5  | 49.9(4)   |
| 01   | P1   | 08   | Mo8  | -64.4(3)  |
| 01   | P1   | 08   | Mo12 | 175.5(2)  |
| 01   | P1   | 08   | Mo9  | 57.2(3)   |
| 01   | P1   | 06   | Mo11 | 175.4(2)  |
| 01   | P1   | 06   | Mo10 | -64.5(3)  |
| 01   | P1   | 06   | Mo4  | 55.9(3)   |
| 01   | P1   | 03   | Mo7  | 54.7(3)   |
| 01   | P1   | 03   | Mo5  | -67.0(3)  |
| 01   | P1   | 03   | Mo6  | 175.7(2)  |
| 010  | Mo2  | 021  | Mo10 | 120.6(5)  |
| 010  | Mo3  | 011  | Mo1  | 68.2(3)   |
| 010  | Mo3  | 012  | Mo5  | 30.2(7)   |
| 015  | Mo7  | 018  | Mo1  | 119.7(4)  |
| 015  | Mo5  | 014  | Mo4  | 32.1(7)   |
| 015  | Mo5  | 016  | Mo6  | 68.1(3)   |
| 013  | Mo4  | 024  | Mo10 | -89.7(3)  |
| 013  | Mo3  | 011  | Mo1  | 4.7(6)    |
| 013  | Mo3  | 012  | Mo5  | -33.6(4)  |
| 040  | Mo8  | 020  | Mo7  | -138.5(4) |
| 040  | Mo8  | 032  | Mo12 | 166.7(3)  |
| 03   | Mo7  | 018  | Mo1  | 48.1(4)   |
| 03   | Mo7  | 015  | Mo5  | -2.6(2)   |
| 03   | Mo5  | 014  | Mo4  | 52.4(4)   |
| 03   | Mo5  | 016  | Mo6  | -1.8(2)   |

| Atom | Atom | Atom | Atom | Angle/°   |
|------|------|------|------|-----------|
| O3   | Mo6  | O28  | Mo12 | 51.6(5)   |
| O3   | Mo6  | O17  | Mo7  | -2.7(2)   |
| O3   | P1   | O8   | Mo8  | 53.2(3)   |
| O3   | P1   | O8   | Mo12 | -66.9(3)  |
| O3   | P1   | O8   | Mo9  | 174.8(2)  |
| O3   | P1   | O6   | Mo11 | 55.4(3)   |
| O3   | P1   | O6   | Mo10 | 175.5(2)  |
| O3   | P1   | O6   | Mo4  | -64.1(3)  |
| O3   | P1   | O1   | Mo1  | -62.8(3)  |
| O3   | P1   | O1   | Mo2  | 176.0(2)  |
| O3   | P1   | O1   | Mo3  | 57.4(3)   |
| O42  | Mo10 | O25  | Mo11 | 166.5(2)  |
| O42  | Mo10 | O23  | Mo9  | -133.6(5) |
| O44  | Mo12 | O27  | Mo11 | -133.4(4) |
| O44  | Mo12 | O30  | Mo9  | 165.8(3)  |
| O39  | Mo7  | O18  | Mo1  | -137.5(4) |
| O39  | Mo7  | O15  | Mo5  | 167.1(3)  |
| O34  | Mo2  | O21  | Mo10 | -136.8(5) |
| O34  | Mo2  | O10  | Mo3  | 167.3(3)  |
| O36  | Mo4  | O24  | Mo10 | 163.8(2)  |
| O36  | Mo4  | O13  | Mo3  | -134.2(5) |
| O43  | Mo11 | O26  | Mo4  | 165.4(3)  |
| O43  | Mo11 | O29  | Mo6  | -134.0(5) |
| O41  | Mo9  | O22  | Mo2  | -133.7(5) |
| O41  | Mo9  | O31  | Mo8  | 166.1(3)  |
| P4   | C51  | C56  | C55  | -174.3(5) |
| P4   | C51  | C52  | C53  | 174.6(5)  |
| P4   | C57  | C58  | C59  | -179.5(5) |
| P4   | C57  | C62  | C61  | 179.4(5)  |
| P4   | C63  | C64  | C65  | -170.1(4) |
| P4   | C63  | C68  | C67  | 171.3(5)  |
| P4   | C45  | C50  | C49  | -179.5(5) |
| P4   | C45  | C46  | C47  | 179.4(6)  |
| C51  | P4   | C57  | C58  | 67.5(6)   |
| C51  | P4   | C57  | C62  | -113.7(5) |
| C51  | P4   | C63  | C64  | -155.4(4) |
| C51  | P4   | C63  | C68  | 33.5(5)   |
| C51  | P4   | C45  | C50  | -140.6(5) |
| C51  | P4   | C45  | C46  | 40.6(6)   |
| C51  | C56  | C55  | C54  | -0.1(11)  |
| C51  | C52  | C53  | C54  | -0.1(11)  |
| C57  | P4   | C51  | C56  | -23.1(6)  |
| C57  | P4   | C51  | C52  | 162.2(5)  |
| C57  | P4   | C63  | C64  | 84.3(5)   |
| C57  | P4   | C63  | C68  | -86.7(5)  |
| C57  | P4   | C45  | C50  | -18.6(6)  |
| C57  | P4   | C45  | C46  | 162.5(5)  |
| C57  | C58  | C59  | C60  | 0.4(11)   |
| C57  | C62  | C61  | C60  | -0.2(11)  |
| C56  | C51  | C52  | C53  | -0.2(10)  |
| C56  | C55  | C54  | C53  | -0.2(12)  |
| C63  | P4   | C51  | C56  | -140.9(5) |
| C63  | P4   | C51  | C52  | 44.4(5)   |
| C63  | P4   | C57  | C58  | -174.0(5) |
| C63  | P4   | C57  | C62  | 4.8(6)    |
| C63  | P4   | C45  | C50  | 99.7(5)   |
| C63  | P4   | C45  | C46  | -79.2(6)  |
| C63  | C68  | C67  | C66  | -1.0(11)  |
| C45  | P4   | C51  | C56  | 97.7(5)   |
| C45  | P4   | C51  | C52  | -77.0(5)  |
| C45  | P4   | C57  | C58  | -53.3(6)  |
| C45  | P4   | C57  | C62  | 125.6(5)  |
| C45  | P4   | C63  | C64  | -35.2(5)  |

| Atom | Atom | Atom | Atom | Angle/°   |
|------|------|------|------|-----------|
| C45  | P4   | C63  | C68  | 153.8(5)  |
| C45  | C50  | C49  | C48  | -0.4(12)  |
| C45  | C46  | C47  | C48  | 0.6(13)   |
| C58  | C57  | C62  | C61  | -1.8(10)  |
| C58  | C59  | C60  | C61  | -2.3(12)  |
| C65  | C66  | C67  | C68  | 0.3(11)   |
| C64  | C63  | C68  | C67  | 0.4(9)    |
| C64  | C65  | C66  | C67  | 1.0(9)    |
| C52  | C51  | C56  | C55  | 0.3(9)    |
| C52  | C53  | C54  | C55  | 0.3(13)   |
| C68  | C63  | C64  | C65  | 0.8(8)    |
| C62  | C57  | C58  | C59  | 1.7(10)   |
| C62  | C61  | C60  | C59  | 2.3(12)   |
| C66  | C65  | C64  | C63  | -1.5(8)   |
| C50  | C45  | C46  | C47  | 0.5(11)   |
| C46  | C45  | C50  | C49  | -0.6(10)  |
| C49  | C48  | C47  | C46  | -1.7(15)  |
| C47  | C48  | C49  | C50  | 1.6(14)   |
| P2   | C19  | C24  | C23  | -173.6(5) |
| P2   | C19  | C20  | C21  | 175.6(7)  |
| P2   | C13  | C14  | C15  | -179.8(5) |
| P2   | C13  | C18  | C17  | 179.8(7)  |
| P2   | C7   | C8   | C9   | -179.7(6) |
| P2   | C7   | C12  | C11  | -179.9(6) |
| P2   | C1   | C2   | C3   | 174.0(6)  |
| C19  | P2   | C13  | C14  | -130.6(6) |
| C19  | P2   | C13  | C18  | 49.2(7)   |
| C19  | P2   | C7   | C8   | -106.2(6) |
| C19  | P2   | C7   | C12  | 75.4(6)   |
| C19  | P2   | C1   | C6   | 8.9(6)    |
| C19  | P2   | C1   | C2   | -168.1(5) |
| C19  | C24  | C23  | C22  | -2.4(11)  |
| C19  | C20  | C21  | C22  | -1.5(14)  |
| C6   | C5   | C4   | C3   | -1.6(11)  |
| C6   | C1   | C2   | C3   | -3.1(11)  |
| C13  | P2   | C19  | C24  | -152.0(5) |
| C13  | P2   | C19  | C20  | 33.2(6)   |
| C13  | P2   | C7   | C8   | 13.9(6)   |
| C13  | P2   | C7   | C12  | -164.5(5) |
| C13  | P2   | C1   | C6   | -109.8(5) |
| C13  | P2   | C1   | C2   | 73.2(6)   |
| C13  | C18  | C17  | C16  | 0.3(15)   |
| C7   | P2   | C19  | C24  | -29.7(6)  |
| C7   | P2   | C19  | C20  | 155.5(6)  |
| C7   | P2   | C13  | C14  | 106.9(6)  |
| C7   | P2   | C13  | C18  | -73.3(7)  |
| C7   | P2   | C1   | C6   | 129.1(5)  |
| C7   | P2   | C1   | C2   | -47.9(6)  |
| C7   | C8   | C9   | C10  | 0.0(12)   |
| C7   | C12  | C11  | C10  | -0.7(13)  |
| C5   | C6   | C1   | P2   | -173.9(5) |
| C5   | C6   | C1   | C2   | 3.2(9)    |
| C5   | C4   | C3   | C2   | 1.6(12)   |
| C24  | C19  | C20  | C21  | 0.6(11)   |
| C24  | C23  | C22  | C21  | 1.6(13)   |
| C15  | C16  | C17  | C18  | -0.3(14)  |
| C1   | P2   | C19  | C24  | 87.0(5)   |
| C1   | P2   | C19  | C20  | -87.9(6)  |
| C1   | P2   | C13  | C14  | -10.8(7)  |
| C1   | P2   | C13  | C18  | 169.0(6)  |
| C1   | P2   | C7   | C8   | 135.0(5)  |
| C1   | P2   | C7   | C12  | -43.4(6)  |
| C1   | C6   | C5   | C4   | -0.9(10)  |

| Atom | Atom | Atom | Atom | Angle/°   |
|------|------|------|------|-----------|
| C1   | C2   | C3   | C4   | 0.7(12)   |
| C14  | C13  | C18  | C17  | -0.4(13)  |
| C14  | C15  | C16  | C17  | 0.3(13)   |
| C16  | C15  | C14  | C13  | -0.4(11)  |
| C8   | C7   | C12  | C11  | 1.6(11)   |
| C8   | C9   | C10  | C11  | 0.9(13)   |
| C12  | C7   | C8   | C9   | -1.3(10)  |
| C20  | C19  | C24  | C23  | 1.3(10)   |
| C23  | C22  | C21  | C20  | 0.3(14)   |
| C9   | C10  | C11  | C12  | -0.5(14)  |
| C18  | C13  | C14  | C15  | 0.4(11)   |
| P3   | C37  | C102 | C101 | -170.4(4) |
| P3   | C37  | C38  | C99  | 171.3(5)  |
| P3   | C39  | C40  | C41  | -178.7(5) |
| P3   | C39  | C44  | C43  | 179.8(5)  |
| P3   | C31  | C32  | C33  | 177.6(4)  |
| P3   | C31  | C36  | C35  | -178.3(5) |
| P3   | C25  | C26  | C27  | -177.6(5) |
| P3   | C25  | C30  | C29  | 179.0(6)  |
| C37  | P3   | C39  | C40  | -27.3(5)  |
| C37  | P3   | C39  | C44  | 153.8(5)  |
| C37  | P3   | C31  | C32  | 132.7(4)  |
| C37  | P3   | C31  | C36  | -48.5(5)  |
| C37  | P3   | C25  | C26  | 85.2(5)   |
| C37  | P3   | C25  | C30  | -91.4(5)  |
| C37  | C102 | C101 | C100 | -1.4(9)   |
| C37  | C38  | C99  | C100 | -0.4(10)  |
| C39  | P3   | C37  | C102 | 77.7(5)   |
| C39  | P3   | C37  | C38  | -96.9(5)  |
| C39  | P3   | C31  | C32  | 13.3(5)   |
| C39  | P3   | C31  | C36  | -167.9(5) |
| C39  | P3   | C25  | C26  | -155.3(4) |
| C39  | P3   | C25  | C30  | 28.1(6)   |
| C39  | C40  | C41  | C42  | -0.6(10)  |
| C31  | P3   | C37  | C102 | -41.6(5)  |
| C31  | P3   | C37  | C38  | 143.7(5)  |
| C31  | P3   | C39  | C40  | 92.0(5)   |
| C31  | P3   | C39  | C44  | -86.8(5)  |
| C31  | P3   | C25  | C26  | -34.9(5)  |
| C31  | P3   | C25  | C30  | 148.5(5)  |
| C31  | C32  | C33  | C34  | 1.2(9)    |
| C25  | P3   | C37  | C102 | -162.6(4) |
| C25  | P3   | C37  | C38  | 22.8(5)   |
| C25  | P3   | C39  | C40  | -146.7(5) |
| C25  | P3   | C39  | C44  | 34.5(5)   |
| C25  | P3   | C31  | C32  | -107.4(5) |
| C25  | P3   | C31  | C36  | 71.4(5)   |
| C25  | C26  | C27  | C28  | -0.9(10)  |
| C25  | C30  | C29  | C28  | -2.2(12)  |
| C102 | C37  | C38  | C99  | -3.3(9)   |
| C102 | C101 | C100 | C99  | -2.4(10)  |
| C40  | C39  | C44  | C43  | 1.0(9)    |
| C42  | C43  | C44  | C39  | -1.8(10)  |
| C38  | C37  | C102 | C101 | 4.2(8)    |
| C32  | C31  | C36  | C35  | 0.5(9)    |
| C32  | C33  | C34  | C35  | -0.4(11)  |
| C26  | C25  | C30  | C29  | 2.4(10)   |
| C26  | C27  | C28  | C29  | 1.1(12)   |
| C101 | C100 | C99  | C38  | 3.3(11)   |
| C43  | C42  | C41  | C40  | -0.3(11)  |
| C44  | C39  | C40  | C41  | 0.2(9)    |
| C41  | C42  | C43  | C44  | 1.5(11)   |
| C33  | C34  | C35  | C36  | -0.3(12)  |

| Atom | Atom | Atom | Atom | Angle/°    |
|------|------|------|------|------------|
| C34  | C35  | C36  | C31  | 0.3(11)    |
| C27  | C28  | C29  | C30  | 0.4(12)    |
| C36  | C31  | C32  | C33  | -1.2(8)    |
| C30  | C25  | C26  | C27  | -0.9(9)    |
| N3   | C85  | C90  | C89  | -175(2)    |
| N3   | C85  | C86  | C87  | 169(2)     |
| N3   | C91  | C96  | C95  | -178.8(18) |
| N3   | C91  | C92  | C93  | 178.7(18)  |
| C97  | N3   | C85  | C90  | 44(3)      |
| C97  | N3   | C85  | C86  | -138.9(16) |
| C97  | N3   | C91  | C96  | 54.5(15)   |
| C97  | N3   | C91  | C92  | -124.3(12) |
| C85  | N3   | C97  | O47  | 174.1(13)  |
| C85  | C90  | C89  | C88  | -5(3)      |
| C85  | C86  | C87  | C88  | 18(4)      |
| C98  | N3   | C97  | O47  | -1.0(13)   |
| C98  | N3   | C85  | C90  | -140.6(18) |
| C98  | N3   | C85  | C86  | 36(2)      |
| C98  | N3   | C91  | C96  | -120.7(12) |
| C98  | N3   | C91  | C92  | 60.5(18)   |
| C90  | C85  | C86  | C87  | -14(3)     |
| C86  | C85  | C90  | C89  | 9(3)       |
| C89  | C88  | C87  | C86  | -17(5)     |
| C87  | C88  | C89  | C90  | 9(4)       |
| N1   | C69  | C74  | C73  | -176(3)    |
| N1   | C69  | C70  | C71  | -179.0(19) |
| C69  | N1   | C75  | O45  | 177(3)     |
| C69  | C74  | C73  | C72  | -11(7)     |
| C71  | C72  | C73  | C74  | 9(7)       |
| C75  | N1   | C69  | C74  | 148(3)     |
| C75  | N1   | C69  | C70  | -34(4)     |
| C74  | C69  | C70  | C71  | -1(3)      |
| C70  | C69  | C74  | C73  | 7(4)       |
| C70  | C71  | C72  | C73  | -3(5)      |
| C72  | C71  | C70  | C69  | 0(3)       |
| C76  | N1   | C69  | C74  | -32(3)     |
| C76  | N1   | C69  | C70  | 146(2)     |
| C76  | N1   | C75  | O45  | -3(6)      |
| C84  | N2   | C83  | O46  | -1(4)      |
| C84  | N2   | C77  | C78  | -25(7)     |
| C84  | N2   | C77  | C82  | 155(5)     |
| C78  | C79  | C80  | C81  | 4(5)       |
| C79  | C78  | C77  | N2   | -180(4)    |
| C79  | C78  | C77  | C82  | 1(7)       |
| C79  | C80  | C81  | C82  | -6(7)      |
| C81  | C82  | C77  | N2   | 178(5)     |
| C81  | C82  | C77  | C78  | -3(8)      |
| C83  | N2   | C77  | C78  | 152(4)     |
| C83  | N2   | C77  | C82  | -29(7)     |
| C77  | N2   | C83  | O46  | -177(3)    |
| C77  | C78  | C79  | C80  | -2(5)      |
| C77  | C82  | C81  | C80  | 5(8)       |
| C91  | N3   | C97  | O47  | -176.2(12) |
| C91  | C96  | C95  | C94  | 0.0        |
| C96  | C91  | C92  | C93  | 0.0        |
| C96  | C95  | C94  | C93  | 0.0        |
| C95  | C94  | C93  | C92  | 0.0        |
| C94  | C93  | C92  | C91  | 0.0        |
| C92  | C91  | C96  | C95  | 0.0        |
| O7   | Mo11 | O26  | Mo4  | -30.4(4)   |
| O7   | Mo11 | O29  | Mo6  | 20.0(6)    |
| O7   | Mo12 | O27  | Mo11 | 20.0(5)    |
| O7   | Mo12 | O30  | Mo9  | -32.5(4)   |

| Atom | Atom | Atom | Atom | Angle/°    |
|------|------|------|------|------------|
| 07   | Mo6  | 028  | Mo12 | 16.1(5)    |
| 07   | Mo6  | 017  | Mo7  | -29.9(4)   |
| 07   | P1   | 02   | Mo5  | -66.2(10)  |
| 07   | P1   | 02   | Mo4  | 62.9(11)   |
| 07   | P1   | 02   | Mo3  | -177.1(8)  |
| 07   | P1   | 05   | Mo10 | -49.1(12)  |
| 07   | P1   | 05   | Mo2  | -176.7(8)  |
| 07   | P1   | 05   | Mo9  | 73.8(10)   |
| 07   | P1   | 04   | Mo8  | -58.4(12)  |
| 07   | P1   | 04   | Mo7  | 65.1(12)   |
| 07   | P1   | 04   | Mo1  | -175.2(8)  |
| 02   | Mo5  | 014  | Mo4  | 22.0(6)    |
| 02   | Mo5  | 016  | Mo6  | -33.0(4)   |
| 02   | Mo4  | 024  | Mo10 | -30.8(5)   |
| 02   | Mo4  | 013  | Mo3  | 18.6(6)    |
| 02   | Mo3  | 011  | Mo1  | -29.7(5)   |
| 02   | Mo3  | 012  | Mo5  | 15.2(5)    |
| 02   | P1   | 07   | Mo11 | -51.5(11)  |
| 02   | P1   | 07   | Mo12 | -177.0(8)  |
| 02   | P1   | 07   | Mo6  | 72.3(10)   |
| 02   | P1   | 05   | Mo10 | 60.3(12)   |
| 02   | P1   | 05   | Mo2  | -67.3(10)  |
| 02   | P1   | 05   | Mo9  | -176.8(8)  |
| 02   | P1   | 04   | Mo8  | -175.3(9)  |
| 02   | P1   | 04   | Mo7  | -51.8(13)  |
| 02   | P1   | 04   | Mo1  | 67.9(12)   |
| 05   | Mo10 | 025  | Mo11 | -28.0(5)   |
| 05   | Mo10 | 023  | Mo9  | 20.1(6)    |
| 05   | Mo2  | 021  | Mo10 | 19.0(6)    |
| 05   | Mo2  | 010  | Mo3  | -31.4(5)   |
| 05   | Mo9  | 022  | Mo2  | 16.3(6)    |
| 05   | Mo9  | 031  | Mo8  | -29.0(4)   |
| 05   | P1   | 07   | Mo11 | 59.4(11)   |
| 05   | P1   | 07   | Mo12 | -66.1(10)  |
| 05   | P1   | 07   | Mo6  | -176.8(8)  |
| 05   | P1   | 02   | Mo5  | -176.6(8)  |
| 05   | P1   | 02   | Mo4  | -47.5(12)  |
| 05   | P1   | 02   | Mo3  | 72.5(10)   |
| 05   | P1   | 04   | Mo8  | 62.3(13)   |
| 05   | P1   | 04   | Mo7  | -174.3(9)  |
| 05   | P1   | 04   | Mo1  | -54.5(12)  |
| 04   | Mo8  | 020  | Mo7  | 18.2(5)    |
| 04   | Mo8  | 032  | Mo12 | -29.3(5)   |
| 04   | Mo7  | 018  | Mo1  | 19.4(5)    |
| 04   | Mo7  | 015  | Mo5  | -27.8(4)   |
| 04   | Mo1  | 019  | Mo8  | 18.0(5)    |
| 04   | Mo1  | 09   | Mo2  | -28.6(4)   |
| 04   | P1   | 07   | Mo11 | -174.0(9)  |
| 04   | P1   | 07   | Mo12 | 60.5(11)   |
| 04   | P1   | 07   | Mo6  | -50.2(11)  |
| 04   | P1   | 02   | Mo5  | 55.5(12)   |
| 04   | P1   | 02   | Mo4  | -175.4(10) |
| 04   | P1   | 02   | Mo3  | -55.4(12)  |
| 04   | P1   | 05   | Mo10 | -173.4(10) |
| 04   | P1   | 05   | Mo2  | 59.0(12)   |
| 04   | P1   | 05   | Mo9  | -50.5(11)  |

**Table 15:** Hydrogen Fractional Atomic Coordinates ( $\times 10^4$ ) and Equivalent Isotropic Displacement Parameters ( $\text{\AA}^2 \times 10^3$ ) for **compound3**.  $U_{eq}$  is defined as 1/3 of the trace of the orthogonalised  $U_{ij}$ .



| Atom | x        | y        | z       | $U_{eq}$ |
|------|----------|----------|---------|----------|
| H56  | 418.64   | 9120.04  | 3508.12 | 65       |
| H58  | 1957.85  | 8452.03  | 3233.2  | 67       |
| H65  | 829.18   | 4409.31  | 4358.62 | 69       |
| H64  | 1535.49  | 5668.09  | 4322.96 | 56       |
| H52  | -316.94  | 7855.56  | 4974.07 | 70       |
| H68  | -925.69  | 7055.96  | 4019.11 | 75       |
| H62  | 622.23   | 6381.22  | 3037.93 | 61       |
| H66  | -731.3   | 4488.19  | 4257.35 | 78       |
| H61  | 986.47   | 6382.31  | 2037.54 | 81       |
| H59  | 2317.62  | 8438.54  | 2231.19 | 83       |
| H50  | 2880.12  | 6978.86  | 3775.62 | 70       |
| H67  | -1615.25 | 5800.37  | 4090.83 | 84       |
| H46  | 1332.04  | 7796.39  | 5198.81 | 82       |
| H53  | -1237.5  | 9091.45  | 5281.84 | 88       |
| H55  | -513.94  | 10362.29 | 3831.92 | 86       |
| H54  | -1329.56 | 10337.03 | 4715.79 | 100      |
| H48  | 4074.5   | 7354.02  | 5289.65 | 101      |
| H49  | 4192.6   | 6941.06  | 4329.34 | 87       |
| H60  | 1784.84  | 7432.07  | 1634.4  | 89       |
| H47  | 2666     | 7744.05  | 5736.6  | 105      |
| H6   | 9040.1   | 4395.72  | 1349.04 | 58       |
| H5   | 10483.4  | 4222.77  | 908.19  | 71       |
| H24  | 8113.89  | 5411.61  | 2713.72 | 67       |
| H15  | 6094.46  | 6076.77  | -339.15 | 81       |
| H4   | 11025.09 | 5337.3   | 399.45  | 79       |
| H14  | 7363.82  | 5971.91  | 250.08  | 68       |
| H16  | 4649.54  | 6064.18  | 69.7    | 85       |
| H8   | 6352.9   | 7397.19  | 1724.17 | 75       |
| H12  | 8954.25  | 6542.57  | 2172.24 | 85       |
| H20  | 6909.46  | 4212.11  | 1449.01 | 92       |
| H23  | 8128.33  | 4178.33  | 3306.75 | 85       |
| H2   | 8633.33  | 6848.28  | 730.13  | 82       |
| H9   | 6437.52  | 8652.88  | 2229.06 | 96       |
| H3   | 10093.46 | 6636.36  | 293.26  | 94       |
| H18  | 5696.78  | 5858.77  | 1675.3  | 103      |
| H10  | 7737.76  | 8853.04  | 2712.22 | 99       |
| H22  | 7472.02  | 3019.98  | 2990.23 | 97       |
| H11  | 9006.95  | 7797.61  | 2679.57 | 98       |
| H17  | 4443.18  | 5964.1   | 1072.04 | 107      |
| H21  | 6859.6   | 3031.35  | 2069.26 | 107      |
| H102 | 5657.23  | 1061.51  | 773.76  | 57       |
| H40  | 6370.06  | 710.72   | 1821.99 | 63       |
| H42  | 8003.02  | 998.67   | 3174.41 | 77       |
| H38  | 7123.53  | -1300.29 | 641.5   | 65       |
| H32  | 7924.1   | 2120.35  | 1087.95 | 56       |
| H26  | 8444.98  | 78.87    | -314.02 | 66       |
| H101 | 4303.66  | 436.29   | 817.63  | 71       |
| H43  | 9290.58  | 735.15   | 2559.24 | 73       |
| H44  | 9121.87  | 512.7    | 1560.42 | 63       |
| H41  | 6552.85  | 979.83   | 2814.43 | 79       |
| H33  | 7880.13  | 3405.09  | 549.65  | 73       |
| H34  | 7401.09  | 3481.81  | -404.88 | 87       |
| H35  | 6977.2   | 2287.63  | -849.64 | 95       |
| H27  | 9633.52  | -914.73  | -680.38 | 86       |
| H100 | 4372.62  | -1046.45 | 792.47  | 86       |
| H28  | 10441.21 | -1881.2  | -69.71  | 99       |
| H99  | 5744.07  | -1897.67 | 663.08  | 86       |
| H36  | 7040.21  | 988.53   | -336.76 | 72       |
| H30  | 8841.96  | -975.1   | 1301.33 | 76       |
| H29  | 10071.02 | -1921.29 | 926.28  | 103      |
| H97  | 4611.17  | 8315.4   | 2115.01 | 90       |
| H98A | 3632.32  | 6397.96  | 2792.79 | 158      |
| H98B | 4603.02  | 5937.92  | 2580.64 | 158      |

| Atom | x       | y        | z       | $U_{eq}$ |
|------|---------|----------|---------|----------|
| H98C | 3888.56 | 6338.12  | 2115.07 | 158      |
| H90  | 4510.55 | 8601.52  | 3138.62 | 92       |
| H86  | 5575.28 | 6030.93  | 3078.54 | 130      |
| H88  | 6518.7  | 7638.53  | 4216.85 | 129      |
| H89  | 5565.5  | 8831.74  | 3860.67 | 115      |
| H87  | 6785.05 | 6394.14  | 3666.94 | 146      |
| H71  | 2811.1  | 823.16   | 5045.14 | 97       |
| H75  | 5348.48 | 505.28   | 3941.7  | 99       |
| H74  | 5549.49 | -726.37  | 5660.04 | 93       |
| H70  | 4172.62 | 1005.25  | 4569.29 | 107      |
| H72  | 2797.63 | -155.12  | 5829.29 | 120      |
| H76A | 6467.61 | 338.92   | 5499.74 | 183      |
| H76B | 7056.06 | 561.13   | 4940.12 | 183      |
| H76C | 6927.71 | -404.87  | 5086.69 | 183      |
| H73  | 4115.77 | -1048.06 | 6027.27 | 132      |
| H84A | 4230.06 | 5906.21  | 6045.84 | 119      |
| H84B | 4816.15 | 4994.49  | 6123.86 | 119      |
| H84C | 3736.46 | 5088.33  | 6188.83 | 119      |
| H78  | 5706.53 | 5753.35  | 5532.15 | 81       |
| H79  | 7034.51 | 5651.41  | 4935.14 | 109      |
| H82  | 4568.39 | 4333.13  | 4366.02 | 77       |
| H80  | 7144.24 | 4836.97  | 4082.95 | 119      |
| H81  | 5884.94 | 4295.59  | 3750.71 | 108      |
| H83  | 3311.36 | 5043.85  | 4737.01 | 87       |
| H96  | 4046.26 | 8553.7   | 3191.97 | 122      |
| H95  | 4745.14 | 8984.42  | 4025.68 | 149      |
| H94  | 6051.47 | 8149.92  | 4382.12 | 161      |
| H93  | 6658.94 | 6884.7   | 3904.85 | 159      |
| H92  | 5960.07 | 6453.97  | 3071.14 | 127      |

**Table 16:** Atomic Occupancies for all atoms that are not fully occupied in **compound3**.

| Atom | Occupancy | Atom | Occupancy | Atom | Occupancy |
|------|-----------|------|-----------|------|-----------|
| O8   | 0.8       | H76B | 0.5       | C93  | 0.51(3)   |
| O6   | 0.8       | H76C | 0.5       | H93  | 0.51(3)   |
| O1   | 0.8       | C73  | 0.5       | C92  | 0.51(3)   |
| O3   | 0.8       | H73  | 0.5       | H92  | 0.51(3)   |
| C85  | 0.49(3)   | O46  | 0.5       | O7   | 0.2       |
| C90  | 0.49(3)   | N2   | 0.5       | O2   | 0.2       |
| H90  | 0.49(3)   | C84  | 0.5       | O5   | 0.2       |
| C86  | 0.49(3)   | H84A | 0.5       | O4   | 0.2       |
| H86  | 0.49(3)   | H84B | 0.5       |      |           |
| C88  | 0.49(3)   | H84C | 0.5       |      |           |
| H88  | 0.49(3)   | C78  | 0.5       |      |           |
| C89  | 0.49(3)   | H78  | 0.5       |      |           |
| H89  | 0.49(3)   | C79  | 0.5       |      |           |
| C87  | 0.49(3)   | H79  | 0.5       |      |           |
| H87  | 0.49(3)   | C82  | 0.5       |      |           |
| O45  | 0.5       | H82  | 0.5       |      |           |
| N1   | 0.5       | C80  | 0.5       |      |           |
| C69  | 0.5       | H80  | 0.5       |      |           |
| C71  | 0.5       | C81  | 0.5       |      |           |
| H71  | 0.5       | H81  | 0.5       |      |           |
| C75  | 0.5       | C83  | 0.5       |      |           |
| H75  | 0.5       | H83  | 0.5       |      |           |
| C74  | 0.5       | C77  | 0.5       |      |           |
| H74  | 0.5       | C91  | 0.51(3)   |      |           |
| C70  | 0.5       | C96  | 0.51(3)   |      |           |
| H70  | 0.5       | H96  | 0.51(3)   |      |           |
| C72  | 0.5       | C95  | 0.51(3)   |      |           |
| H72  | 0.5       | H95  | 0.51(3)   |      |           |
| C76  | 0.5       | C94  | 0.51(3)   |      |           |
| H76A | 0.5       | H94  | 0.51(3)   |      |           |

## Citations

O.V. Dolomanov and L.J. Bourhis and R.J. Gildea and J.A.K. Howard and H. Puschmann, Olex2: A complete structure solution, refinement and analysis program, *J. Appl. Cryst.*, (2009), **42**, 339-341.

SADABS, Bruker axs, Madison, WI (?).

Sheldrick, G.M., Crystal structure refinement with ShelXL, *Acta Cryst.*, (2015), **C71**, 3-8.

Sheldrick, G.M., ShelXT-Integrated space-group and crystal-structure determination, *Acta Cryst.*, (2015), **A71**, 3-8.

Packing diagrams for compounds **1**, **2** and **3** are shown in **Figures S5, S6 and S7**

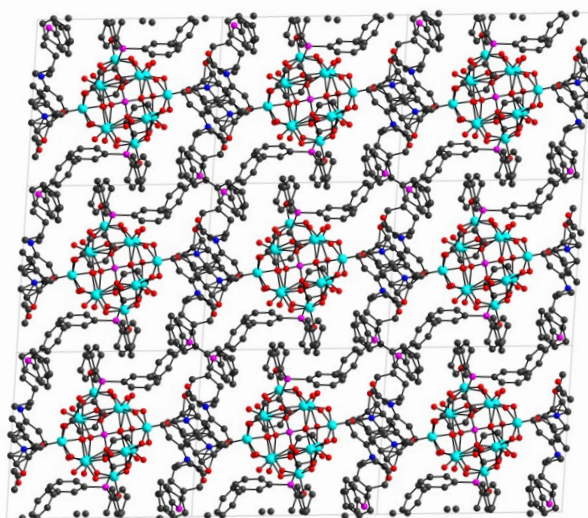

Fig.  
1.

S

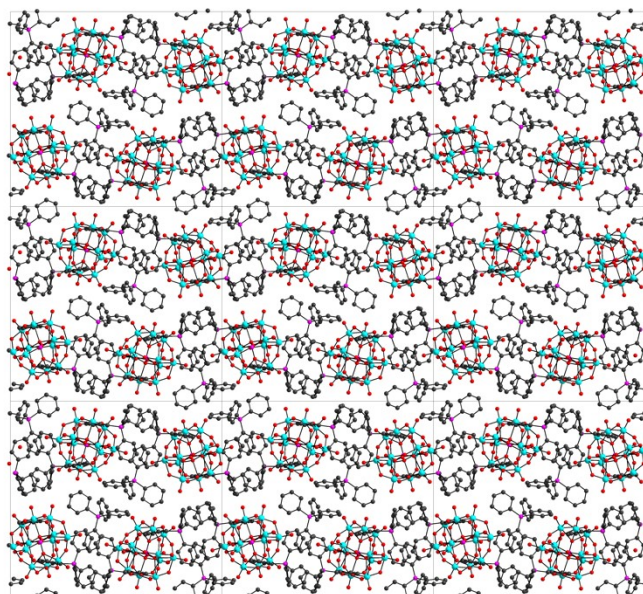

ons in the crystal structure of compound

**Fig. S6.** The packing of tetraphenylphosphonium cations and Keggin anions in the crystal structure of compound **2**.

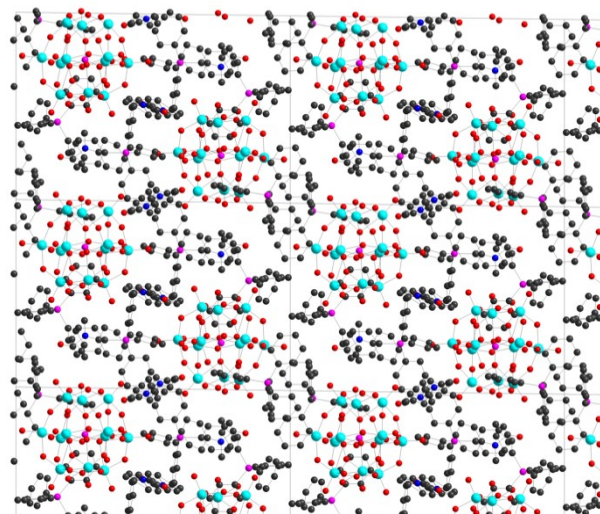

**Fig. S7.** The packing of tetraphenylphosphonium cations and Keggin anions in the crystal structure of compound **3**.

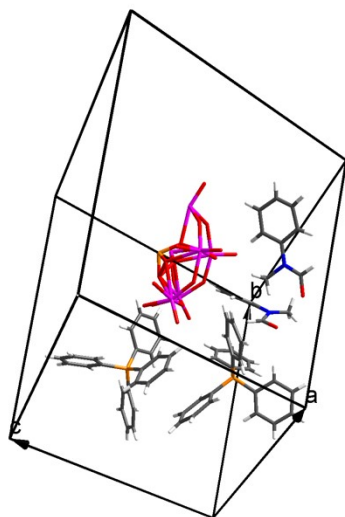

Fig. S8. Left: The asymmetric unit in the crystal structure of compound **1**.

## S5. Thermogravimetric Analysis (TGA)

The TGA data was recorded on a Mettler Toledo TGA 1 instrument for the temperature range of 25°-800°C at the rate of 5°C min<sup>-1</sup> under an inert flow of dry N<sub>2</sub> gas (flow rate 20 cm<sup>3</sup> min<sup>-1</sup>). Prior to recording the data for the solid sample, a blank was run under the same parameters using an empty ceramic crucible.

S5.1. The thermogravimetric analysis for compounds **1** shows the loss of two NMF molecules in the temperature range of 130-150°C.

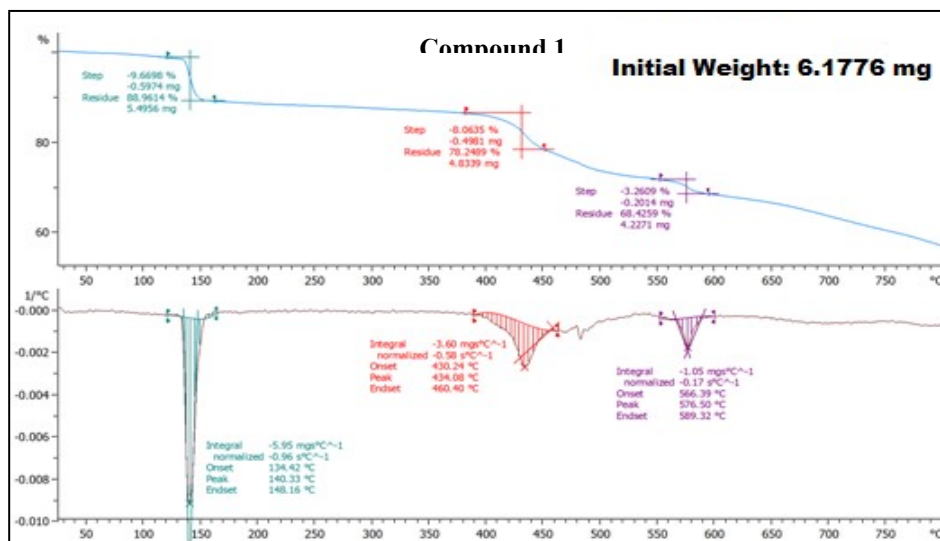

Fig. S9. Thermal analysis plot for compound **1**.

S5.2. The thermogravimetric analysis for compound **2** showed minimal weight loss before 400°C. The framework disintegration was observed beyond 450°C.

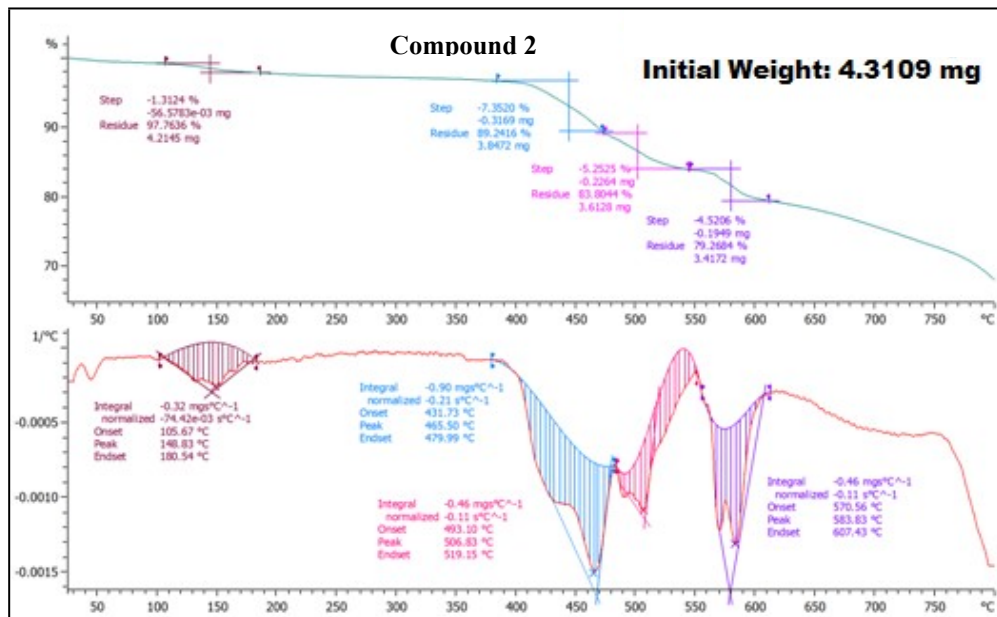

Fig. S10. Thermal analysis plot for compound 2.

S6. The thermogravimetric analysis for compounds 3 shows the loss of one NMF molecule in the temperature range of 130-150 °C.

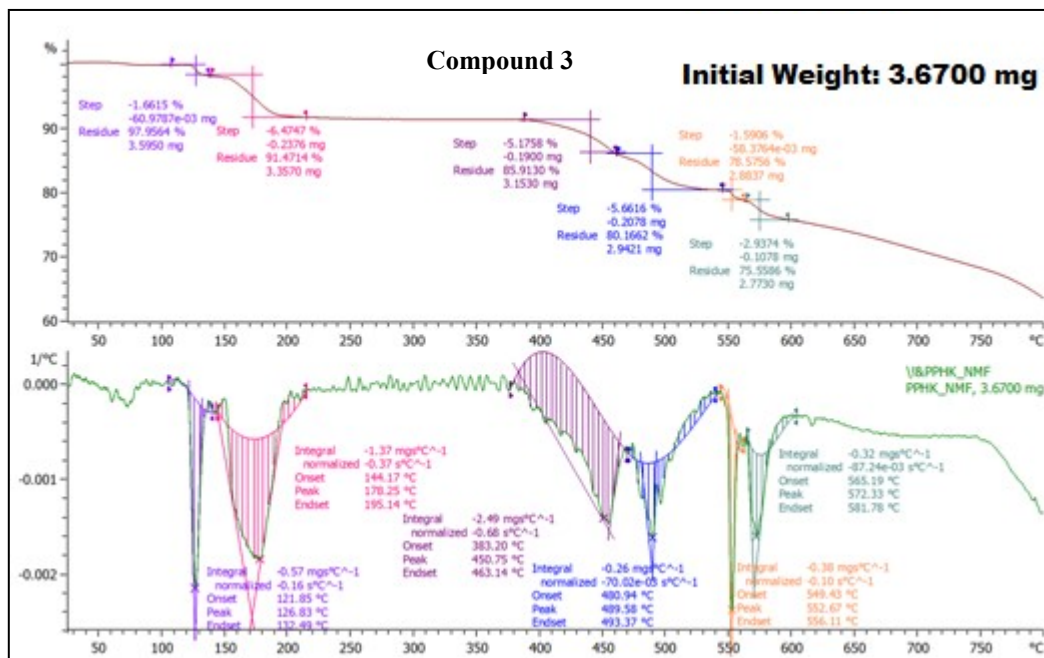

Fig. S11. Thermal analysis plot for compound 3.

## S6. Electron Paramagnetic Resonance Spectroscopy (EPR)

The room temperature EPR spectra of reduced compound **1** is shown in Fig. S13.

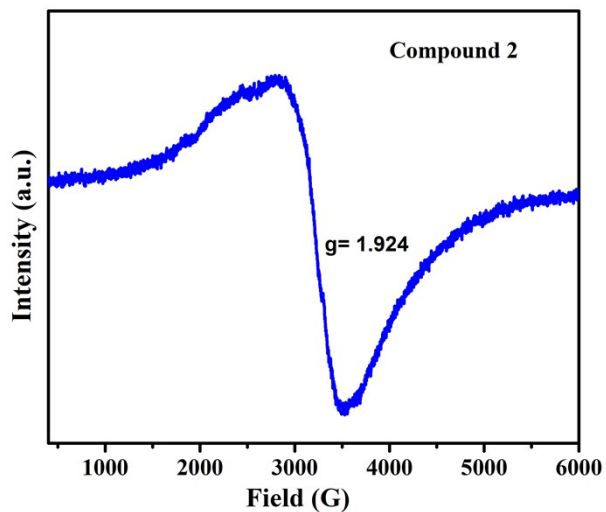

**Fig. S12.** The room temperature EPR spectra of green crystalline solid of compound **1**.

## S7. Elemental analysis

The CHN data of compounds **1**, **2** and **3** are given in **Fig. S14** and data were collected on Elementar, Vario EL Cube instrument. The compound **1** shows presence of four solvent methyl formamide molecules as observed from the CHN data. The crystal structure of compound **2** is solved and refined by applying SQUEEZ command therefore the solvent molecules are not given in the crystal data but solvent molecules are mentioned in the formulas of compound **2** based on CHN data.

varioELcube  
serial number: 19171021

Text report

| No. | Weight [g] | Name   | Method | N [%] | C [%] | H [%] | S [%] | N Area | C Area | H Area | S Area | C/N ratio | C/H ratio | Date       | Time  |
|-----|------------|--------|--------|-------|-------|-------|-------|--------|--------|--------|--------|-----------|-----------|------------|-------|
| 18  | 7.9870     | AT-ORG | 5mg90s | 1.11  | 34.18 | 2.088 | 0.036 | 3 471  | 70 302 | 10 922 | 1 541  | 30.8506   | 16.3693   | 22/08/2022 | 15:13 |
| 19  | 5.3190     | ATGR   | 5mg90s | 1.53  | 40.26 | 2.480 | 0.039 | 3 212  | 55 304 | 8 475  | 1 095  | 26.2724   | 16.2348   | 22/08/2022 | 15:23 |
| 20  | 3.9760     | AT-YLW | 5mg90s | 1.11  | 33.11 | 1.733 | 0.052 | 1 839  | 34 160 | 4 259  | 1 100  | 29.8877   | 19.1096   | 22/08/2022 | 15:35 |

Name: eassuperuser, Access: varioELcube superuser

23/08/2022 10:45:57

varioEL cube V4.0.11 (186ca69c1)2017-04-27, CHNS Mode, Ser. No.: 19171021  
Elementar Analysensysteme GmbH

Page 1 (of 1)

The observed and calculated CHN data for compounds **1**, **2** and **3** are given below.

Compound **1**  $[\text{PPh}_4]_4[\text{PMo}^{\text{VI}}\text{Mo}^{\text{VI}}_{11}\text{O}_{40}] \cdot 3\text{CH}_3(\text{C}_6\text{H}_5)\text{NCHO}$

Anal. Calcd. for  $\text{C}_{120}\text{H}_{107}\text{N}_3\text{O}_{43}\text{P}_5\text{Mo}_{12}$ : C, 40.26 (40.20); H, 2.48 (3.01); N, 1.53 (1.17).

Compound **2**  $[\text{PPh}_4]_3[\text{PMo}^{\text{VI}}_{12}\text{O}_{40}] \cdot 3\text{CH}_3(\text{C}_6\text{H}_5)\text{NCHO}$

Anal. Calcd. for  $\text{C}_{96}\text{H}_{87}\text{N}_3\text{O}_{43}\text{P}_4\text{Mo}_{12}$ : C, 33.11 (35.52); H, 1.73(2.70); N, 1.11 (1.29).

Compound **3**  $[\text{PPh}_4]_3[\text{PMo}^{\text{VI}}_{12}\text{O}_{40}] \cdot 2\text{CH}_3(\text{C}_6\text{H}_5)\text{NCHO}$

Anal. Calcd. for  $\text{C}_{88}\text{H}_{78}\text{N}_2\text{O}_{42}\text{P}_4\text{Mo}_{12}$ : C, 34.18 (33.98); H, 2.09(2.53); N, 1.11(0.90).

## S8. Synthetic procedures

### 8.1. Synthesis of polycrystalline compound.

Aqueous solution of  $\text{H}_3[\text{PMo}_{12}\text{O}_{40}]$  (0.70g, 0.42mmol in 75ml) was prepared. To it 25mL  $\text{H}_2\text{O}$ -MeOH (4:1 v/v) solution of tetraphenylphosphonium bromide;  $\text{PPh}_4\text{Br}$  (1.5g, 3.5mmol) was added. The obtained yellow colored suspension was refluxed for two hours



at 100°C. Resultant yellow precipitate was washed with water and vacuum dried. Yield: 89.6%. IR (cm<sup>-1</sup>): 1435 (s,  $\nu(\text{C}=\text{C})$ ), 1104 (s,  $\nu_s(\text{P}-\text{C})$ ), 1060 (m,  $\nu_{\text{as}}(\text{PO}_4)$ ), 952 (m,  $\nu(\text{Mo}=\text{O}_t)$ ), 879 (s), 794 (s), 714 (m), 680 (s,  $\nu(\text{C}-\text{H})$ ), 522 (s), 408 (s).

### 8.2. Synthesis of Compound 1

A 4 mL suspension of polycrystalline compound (81.1  $\mu\text{mol}$ , 0.25 g) in N-methylformamide (NMF) was sonicated for thirty minutes. The obtained suspension was then irradiated with sunlight. After fifteen minutes green needle shape crystals were obtained. The crystals were separated, washed and dried. IR (cm<sup>-1</sup>): 1670 (s,  $\nu(\text{C}=\text{O})$ ), 1593 (s), 1497 (s), 1437 (s,  $\nu(\text{C}=\text{C})$ ), 1347 (m), 1323 (m), 1266 (m), 1189 (m), 1165 (s), 1108 (s,  $\nu_s(\text{P}-\text{C})$ ), 1060 (m,  $\nu_{\text{as}}(\text{PO}_4)$ ), 1027 (m), 997 (m), 955 (m,  $\nu(\text{Mo}=\text{O}_t)$ ), 877 (s), 802 (s), 743 (m), 719 (m), 689 (s,  $\nu(\text{C}-\text{H})$ ), 527 (s), 459 (m).

### 8.3. Synthesis of Compound 2

After the separation of compound 1 from the polycrystalline suspension in NMF, the solvent was filtered to remove the undissolved compound polycrystalline compound. The clear yellow filtrate was then allowed to stand at low temperature ( $\sim 10^\circ\text{C}$ ). Yellow plate shape crystals were obtained after 7 days. IR (cm<sup>-1</sup>): 1482 (m), 1437 (s,  $\nu(\text{C}=\text{C})$ ), 1323 (m), 1189 (m), 1162 (m), 1108 (s,  $\nu_s(\text{P}-\text{C})$ ), 1060 (m,  $\nu_{\text{as}}(\text{PO}_4)$ ), 997 (m), 952 (m,  $\nu(\text{Mo}=\text{O}_t)$ ), 877 (s), 797 (s), 746 (m), 719 (m), 686 (s,  $\nu(\text{C}-\text{H})$ ), 524 (s), 461 (m).

### 8.4. Synthesis of Compound 3

After the separation of compound 1 from suspension in NMF, the solvent was filtered to remove the undissolved polycrystalline compound. The clear yellow filtrate was then allowed to stand undisturbed at room temperature. Orange cube shape crystals were obtained after 4 days.

IR (cm<sup>-1</sup>): 1670 (s,  $\nu(\text{C}=\text{O})$ ), 1589 (s), 1497 (s), 1434 (s,  $\nu(\text{C}=\text{C})$ ), 1350 (m), 1320 (m), 1266 (m), 1191 (m), 1162 (s), 1108 (s,  $\nu_s(\text{P}-\text{C})$ ), 1060 (m,  $\nu_{\text{as}}(\text{PO}_4)$ ), 1027 (m), 994 (m), 955 (m,  $\nu(\text{Mo}=\text{O}_t)$ ), 880 (s), 802 (s), 746 (m), 719 (m), 686 (s,  $\nu(\text{C}-\text{H})$ ), 524 (s), 461 (m).

## S8. The real time images of initiation of crystallization and green crystal of compound 1

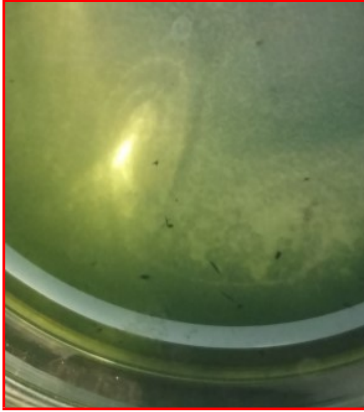

Initiation of crystallization

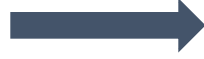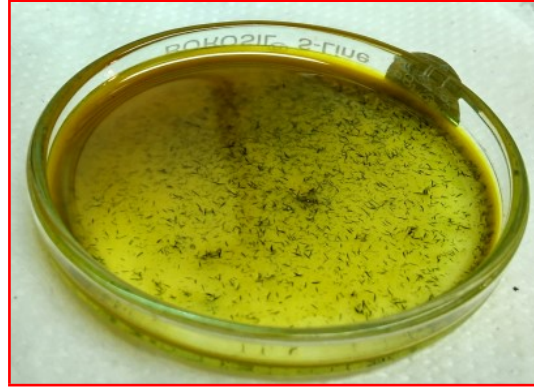

Green crystals formed along with the yellow amorphous compound which remains undissolved

\*\*\*\*\*
